# Supplementary material for: Metal–organic frameworks as selectivity regulators for hydrogenation reactions
Source: Springer Nature journal article supplement (doi:10.1038/nature19763), 2016-10-04
Supplement: 41586_2016_BFnature19763_MOESM257_ESM.pdf [file 41586_2016_BFnature19763_MOESM257_ESM.pdf]

## Supplementary Information

### Metal-Organic Frameworks as Selectivity Regulators for Hydrogenation Reactions

Meiting Zhao<sup>1\*</sup>, Kuo Yuan<sup>1,2\*</sup>, Yun Wang<sup>3</sup>, Guodong Li<sup>1</sup>, Jun Guo<sup>1</sup>, Lin Gu<sup>4</sup>, Wenping Hu<sup>2,5</sup>, Huijun Zhao<sup>3</sup> & Zhiyong Tang<sup>1</sup>

<sup>1</sup> CAS Key Laboratory of Nanosystem and Hierarchy Fabrication, CAS Center for Excellence in Nanoscience, National Center for Nanoscience and Technology, Beijing 100190, P. R. China

<sup>2</sup> School of Science, Tianjin University, Tianjin 300072, P. R. China

<sup>3</sup> Centre for Clean Environment and Energy, Gold Coast Campus, Griffith University, QLD 4222, Australia

<sup>4</sup> Institute of Physics, Chinese Academy of Sciences, Beijing 100190, P. R. China

<sup>5</sup> Institute of Chemistry, Chinese Academy of Sciences, Beijing 100190, P. R. China

\*These authors contributed equally to this work.

Corresponding authors: Z.T. (zytang@nanoctr.cn), G.L. (liguodong@nanoctr.cn), or H.Z. (h.zhao@griffith.edu.au).

## Table of Contents

|                                                                                          |     |
|------------------------------------------------------------------------------------------|-----|
| General information.....                                                                 | S1  |
| Reagents.....                                                                            | S1  |
| Characterization.....                                                                    | S1  |
| Supplementary Methods .....                                                              | S2  |
| Synthesis of Pt NPs.....                                                                 | S2  |
| Synthesis of Ru NPs.....                                                                 | S2  |
| Synthesis of MIL-101(Fe).....                                                            | S2  |
| Synthesis of MIL-101(Cr).....                                                            | S3  |
| Synthesis of supported MIL-101(Fe)@Pt.....                                               | S3  |
| Synthesis of supported MIL-101(Cr)@Pt.....                                               | S3  |
| Synthesis of MIL-101(Fe)@Pt@MIL-101(Fe) <sup>22.0</sup> .....                            | S3  |
| Synthesis of MIL-101(Fe)@Pt@MIL-101(Fe) <sup>9.2</sup> .....                             | S4  |
| Synthesis of MIL-101(Cr)@Pt@MIL-101(Fe) <sup>8.8</sup> .....                             | S4  |
| Synthesis of MIL-101(Cr)@Pt@MIL-101(Fe) <sup>2.9</sup> .....                             | S4  |
| Synthesis of MIL-101(Cr)@Pt@MIL-101(Cr) <sup>5.1</sup> .....                             | S5  |
| Synthesis of MIL-101(Fe)@Ru@MIL-101(Fe) <sup>8.3</sup> .....                             | S5  |
| Synthesis of MOF-525(Zr)@Pt@MOF-525(Zr) <sup>26.5</sup> .....                            | S5  |
| Synthesis of UiO-66(Zr)@Pt@UiO-66(Zr) <sup>11.2</sup> .....                              | S6  |
| Synthesis of UiO-67(Zr)@Pt@UiO-67(Zr) <sup>24.1</sup> .....                              | S7  |
| Synthesis of MOF-74(Co)@Pt@MOF-74(Co) <sup>8.4</sup> .....                               | S8  |
| Synthesis of Pt/Fe <sub>2</sub> O <sub>3</sub> .....                                     | S8  |
| Catalytic selective hydrogenation of <i>trans</i> -cinnamaldehyde to cinnamyl alcohol... | S9  |
| Catalytic selective hydrogenation of furfural to furfuryl alcohol.....                   | S9  |
| Catalytic selective hydrogenation of 3-methyl-2-butenal to 3-methyl-2-butenol.....       | S10 |
| Catalytic selective hydrogenation of acrolein to allyl alcohol.....                      | S10 |
| Supplementary theoretical calculation .....                                              | S11 |
| Supplementary Note 1.....                                                                | S13 |

|                                                                                  |     |
|----------------------------------------------------------------------------------|-----|
| General synthesis of sandwich MIL-101@Pt@MIL-101 nanostructures.....             | S13 |
| Supplementary Note 2.....                                                        | S13 |
| Characterization of sandwich structures with thin shell thickness.....           | S13 |
| Supplementary Note 3.....                                                        | S13 |
| DFT calculation on the interaction between <b>A</b> and MIL-101 cell.....        | S13 |
| Supplementary Note 4.....                                                        | S13 |
| Binding energy of different metal elements in supported MIL-101@Pt.....          | S13 |
| Supplementary Note 5.....                                                        | S14 |
| Selective hydrogenation of acrolein to allyl alcohol by different catalysts..... | S14 |
| Supplementary Figures (Supplementary Figs 1-54).....                             | S16 |
| Supplementary Tables (Supplementary Tables 1-11).....                            | S72 |
| Supplementary References.....                                                    | S84 |

## General information

**Reagents.** Chloroplatinic acid ( $\text{H}_2\text{PtCl}_6$ , 37wt% Pt) was purchased from Sinopharm (China). Chromium(III) chloride hexahydrate ( $\text{CrCl}_3 \cdot 6\text{H}_2\text{O}$ , 98wt%), iron(III) chloride hexahydrate ( $\text{FeCl}_3 \cdot 6\text{H}_2\text{O}$ , 97wt%), 1,4-benzenedicarboxylate ( $\text{H}_2\text{BDC}$ , 98wt%), *N,N*-dimethylformamide (DMF, 99.8wt%), 2,5-dihydroxyterephthalic acid (DHTA, 99wt%), *trans*-cinnamaldehyde (98wt%), and  $\text{RuCl}_3 \cdot 3\text{H}_2\text{O}$  (99.99%) were provided by Alfa Aesar. Zirconium chloride ( $\text{ZrCl}_4$ , 98wt%) and 4,4,4,4-(porphine-5,10,15,20-tetrayl)tetrakis(benzoic acid) ( $\text{H}_2\text{TCPP}$ , 97wt%) were purchased from Aladdin. Polyvinylpyrrolidone (PVP,  $M_w=55000$ ), furfural (99wt%), and triethylamine (99wt%) were bought from Sigma-Aldrich.  $\text{Co}(\text{NO}_3)_2 \cdot 6\text{H}_2\text{O}$  (99.99wt%) and 3-methyl-2-butenal (98wt%) were achieved from Shanghai Macklin Biochemical Co., Ltd. Biphenyl-4,4'-dicarboxylic acid ( $\text{H}_2\text{BPDC}$ , 98wt%) was obtained from Shanghai Saen chemical technology Co., LTD. Acrolein (99.5wt%) was bought from Hubei Jusheng Keji Co., Ltd. Deuterated chloroform (Chloroform-d, 99.8 atom%D) was purchased from J&K. Other analytical grade solvents including methanol, ethanol, isopropanol, and acetic acid were supplied by Sinopharm. Carbon supported Pt (Pt/C, 20wt% Pt) was bought from Johnson Matthey Corp.  $\text{Fe}_2\text{O}_3$  (99wt%) was purchased from Tianjin Bodi Chemical Co., Ltd. All the chemicals were used without further purification.

**Characterization.** Scanning electron microscopy (SEM) measurement was performed on a Hitachi S4800 scanning electron microscope at 6.0 kV. Transmission electron microscopy (TEM) and high-resolution TEM (HRTEM) imaging was carried out using Tecnai G<sup>2</sup> F20 S-TWIN at 200 kV. High angle annular dark field scanning transmission electron microscopy (HAADF-STEM) imaging and energy-dispersive X-ray spectroscopy (EDS) elemental mapping were carried out on JEM-ARM 200F at 200 kV. Powder X-ray diffraction (XRD) patterns were recorded on D/MAX-TTRIII (CBO) with Cu K $\alpha$  radiation ( $\lambda = 1.542 \text{ \AA}$ ) operating at 50 kV and 300 mA. X-ray photoelectron spectroscopy (XPS) spectra were performed by an ESCALAB 20 Xi XPS system, where the analysis chamber was  $1.5 \times 10^{-9}$  mbar and the size of X-ray spot was 500  $\mu\text{m}$ . Fourier transform infrared (FTIR) spectra were recorded on a Spectrum One in the spectral range of  $400\text{cm}^{-1}$  -  $4000 \text{ cm}^{-1}$  using the KBr disk method. The specific surface area, pore volume and pore size of catalysts were measured

using a BET (Brunauer-Emmett-Teller) instrument (ASAP 2420-4, Micromeritics). The Pt content in different samples was determined by inductively coupled plasma mass spectrometer (ICP-MS, Thermo Fisher Scientific). Microwave vessel (NOVA-II) was bought from Preekem (China). Nuclear magnetic resonance (NMR) spectra were recorded at 400 MHz with an Avance III Bruker Corporation instrument.

### **Supplementary Methods**

**Synthesis of Pt nanoparticles (NPs).** Pt NPs were synthesized according to the literature<sup>1</sup>. In a typical procedure, 16.6 mg PVP ( $M_w = 55000$ ) was dissolved in 45 mL propanol (or ethanol), and then 5.0 mL  $H_2PtCl_6$  aqueous solution (6.0 mM) was added drop by drop. After stirring for about 2 min at room temperature, the solution was refluxed in a 100 mL flask for 3 h under air to synthesize the PVP-stabilized Pt NPs. The concentration of as-synthesized Pt NPs was about 0.6 mM and used directly without further treatment.

**Synthesis of Ru NPs.** Ru NPs were synthesized according to the literature<sup>2</sup>. In a typical procedure, 13.05 mg  $RuCl_3 \cdot 3H_2O$  and 55.5 mg PVP were added into 10 mL ethylene glycol at room temperature. The solution was then heated to 80°C with magnetic stirring and maintained at this temperature for 30 min under Ar atmosphere. After that, the solution was heated to 180°C and kept at this temperature for 2 h. When the reaction was complete, acetone was added into the solution, and the resulting black suspension was subjected to centrifuge. The precipitated Ru NPs were then separated, collected, and redispersed in 80 mL ethanol (0.6 mM).

**Synthesis of MIL-101(Fe).** MIL-101(Fe) was synthesized according to the literature<sup>3</sup>. In a typical procedure, 93.4 mg  $FeCl_3 \cdot 6H_2O$  (0.346 mmol) and 57.5 mg  $H_2BDC$  (0.346 mmol) were dissolved in 16 mL DMF. Subsequently, the solution was placed in a microwave vessel and sealed. The reaction was then rapidly heated to 160°C, and was held at this temperature for 10 min. After cooling to room temperature, the solid products were collected by centrifugation at 5000 rpm for 10 min and washed twice with DMF. Finally, the obtained MIL-101(Fe) was redispersed in 12 mL DMF for further use.

**Synthesis of MIL-101(Cr).** MIL-101(Cr) was synthesized according to the literature with some modification<sup>4</sup>. In a typical procedure, 266.5 mg  $\text{CrCl}_3 \cdot 6\text{H}_2\text{O}$  (1.0 mmol) and 166.1 mg  $\text{H}_2\text{BDC}$  (1.0 mmol) were dispersed in 7.2 mL  $\text{H}_2\text{O}$ . After vigorous stirring at room temperature for 3 min, the mixed solution was transferred into a Teflon-lined stainless steel autoclave and heated at  $210^\circ\text{C}$  for 24 h. When completing the reaction and slowly cooling to room temperature, a certain amount of recrystallized  $\text{H}_2\text{BDC}$  was formed in the green solution. The solution was centrifuged at 1000 rpm for 3 min to remove  $\text{H}_2\text{BDC}$ . Subsequently, the supernatant green solution containing MIL-101(Cr) was collected by centrifugation at 5000 rpm for 10 min and washed twice with DMF. Finally, the obtained MIL-101(Cr) was redispersed in 40 mL DMF for further use.

**Synthesis of supported MIL-101(Fe)@Pt.** 12 mL as-synthesized Pt NP solution (0.6 mM) was added drop by drop into 12 mL DMF of MIL-101(Fe) under vigorous stirring, and then the mixed solution was further stirred at room temperature for 2 h. Subsequently, MIL-101(Fe)@Pt was collected by centrifugation at 5000 rpm for 10 min and washed twice with ethanol. Finally, the obtained MIL-101(Fe)@Pt was redispersed in 12 mL ethanol, which was directly used as the catalyst for liquid-phase selective hydrogenation.

The obtained MIL-101(Fe)@Pt after centrifugation was also washed twice with DMF and redispersed in 12 mL DMF for subsequent synthesis of sandwich nanostructures.

**Synthesis of supported MIL-101(Cr)@Pt.** 20 mL as-synthesized Pt NP solution (0.6 mM) was added drop by drop into 20 mL DMF of MIL-101(Cr) under vigorous stirring, and then the mixed solution was further stirred at room temperature for 2 h. Subsequently, MIL-101(Cr)@Pt was collected by centrifugation at 5000 rpm for 10 min and washed twice with ethanol. Finally, MIL-101(Cr)@Pt was redispersed in 20 mL ethanol, which was directly used as the catalyst for liquid-phase selective hydrogenation.

The obtained MIL-101(Cr)@Pt after centrifugation was also washed twice with DMF and redispersed in 20 mL DMF for subsequent synthesis of sandwich nanostructures.

**Synthesis of MIL-101(Fe)@Pt@MIL-101(Fe)<sup>22,0</sup>.** For synthesis of sandwich MIL-101(Fe)@Pt@MIL-101(Fe) nanostructures, a precursor solution of MIL-101(Fe) was prepared as follow: 27.0 mg FeCl<sub>3</sub>·6H<sub>2</sub>O (0.1 mmol) and 16.6 mg H<sub>2</sub>BDC (0.1 mmol) were dissolved in 3 mL DMF. In a typical procedure, 4 mL DMF of MIL-101(Fe)@Pt and 1.8 mL precursor solution were mixed, and then the mixed solution was heated at 120°C for 8 h to grow MIL-101(Fe) shell onto the supported MIL-101(Fe)@Pt. After that, the obtained product was collected by centrifugation at 5000 rpm for 10 min and washed twice with ethanol. Finally, the obtained MIL-101(Fe)@Pt@MIL-101(Fe) was redispersed in 4 mL ethanol, which was directly used as the catalyst for liquid-phase selective hydrogenation.

**Synthesis of MIL-101(Fe)@Pt@MIL-101(Fe)<sup>9,2</sup>.** In a typical procedure, 4 mL DMF of MIL-101(Fe)@Pt and 0.9 mL precursor solution were mixed, and then the mixed solution was heated at 120°C for 8 h to grow MIL-101(Fe) shell onto the supported MIL-101(Fe)@Pt. After that, the obtained product was collected by centrifugation at 5000 rpm for 10 min and washed twice with ethanol. Finally, the obtained MIL-101(Fe)@Pt@MIL-101(Fe) was redispersed in 4 mL ethanol, which was directly used as the catalyst for liquid-phase selective hydrogenation.

**Synthesis of MIL-101(Cr)@Pt@MIL-101(Fe)<sup>8,8</sup>.** In a typical procedure, 6 mL DMF of MIL-101(Cr)@Pt and 0.75 mL precursor solution were mixed, and then the mixed solution was heated at 120°C for 4 h to grow MIL-101(Fe) shell onto the supported MIL-101(Cr)@Pt. After that, the obtained product was collected by centrifugation at 5000 rpm for 10 min and washed twice with ethanol. Finally, the obtained MIL-101(Cr)@Pt@MIL-101(Fe) was redispersed in 6 mL ethanol, which was directly used as the catalyst for liquid-phase selective hydrogenation.

**Synthesis of MIL-101(Cr)@Pt@MIL-101(Fe)<sup>2,9</sup>.** In a typical procedure, 6 mL DMF of MIL-101(Cr)@Pt and 0.15 mL precursor solution were mixed, and then the mixed solution was heated at 120°C for 4 h to grow MIL-101(Fe) shell onto the supported MIL-101(Cr)@Pt. After that, the obtained product was collected by centrifugation at 5000 rpm for 10 min and

washed twice with ethanol. Finally, the obtained MIL-101(Cr)@Pt@MIL-101(Fe) was redispersed in 6 mL ethanol, which was directly used as the catalyst for liquid-phase selective hydrogenation.

**Synthesis of MIL-101(Cr)@Pt@MIL-101(Cr)<sup>5.1</sup>.** For synthesis of sandwich MIL-101(Cr)@Pt@MIL-101(Cr) nanostructures, a precursor solution of MIL-101(Cr) was prepared as follow: 26.6 mg CrCl<sub>3</sub>·6H<sub>2</sub>O (0.1 mmol) and 16.6 mg H<sub>2</sub>BDC (0.1 mmol) were dissolved in 3 mL DMF. In a typical procedure, 6 mL DMF of MIL-101(Cr)@Pt and 0.5 mL precursor solution were mixed, and then the mixed solution was heated at 120°C for 5 h to grow MIL-101(Cr) shell onto the supported MIL-101(Cr)@Pt. After that, the obtained product was collected by centrifugation at 8000 rpm for 10 min and washed twice with ethanol. Finally, the obtained MIL-101(Cr)@MIL-101(Cr) was redispersed in 6 mL ethanol, which was directly used as the catalyst for liquid-phase selective hydrogenation.

**Synthesis of MIL-101(Fe)@Ru@MIL-101(Fe)<sup>8.3</sup>.**

**Synthesis of MIL-101(Fe)@Ru:** 4 mL as-synthesized Ru NP solution was added drop by drop into 4 mL DMF of MIL-101(Fe) under vigorous stirring, and then the mixed solution was further stirred at room temperature for 2 h. Subsequently, MIL-101(Fe)@Ru was collected by centrifugation at 5000 rpm for 10 min and washed twice with DMF. Finally, the obtained MIL-101(Fe)@Ru was redispersed in 4 mL DMF for subsequent synthesis of sandwich nanostructures.

**Synthesis of MIL-101(Fe)@Ru@MIL-101(Fe):** In a typical procedure, 4 mL DMF of MIL-101(Fe)@Ru and 1.0 mL precursor solution were mixed, and then the mixed solution was heated at 120°C for 8 h to grow MIL-101(Fe) shell onto the supported MIL-101(Fe)@Ru. After that, the obtained product was collected by centrifugation at 5000 rpm for 10 min and washed twice with ethanol. Finally, the obtained MIL-101(Fe)@Ru@MIL-101(Fe) was redispersed in 4 mL ethanol, which was directly used as the catalyst for liquid-phase selective hydrogenation.

**Synthesis of MOF-525(Zr)@Pt@MOF-525(Zr)<sup>26.5</sup>.**



**Synthesis of MOF-525(Zr):** MOF-525(Zr) was synthesized according to the literature<sup>5</sup> with minor modifications. In a typical procedure, 4.2 mg ZrCl<sub>4</sub> was dissolved in 3 mL DMF by ultrasonication, while 7.1 mg H<sub>2</sub>TCPP acid was directly dissolved in 3 mL DMF. Subsequently, the above solutions were mixed uniformly and then 1 mg PVP and 450 μL acetic acid were added into the mixed solution. Afterwards, the solution was placed in 90°C oil bath for 24 h. After that, the obtained product was collected by centrifugation at 8000 rpm for 10 min and washed twice with DMF and twice with ethanol. Finally, the obtained MOF-525(Zr) was redispersed in 2 mL ethanol for further use.

**Synthesis of MOF-525(Zr)@Pt:** In a typical procedure, 2 mL as-synthesized Pt NP solution (0.6 mM) was added drop by drop into 2 mL ethanol of MOF-525(Zr) under vigorous stirring, and then the mixed solution was further stirred at room temperature for 3 h. Subsequently, MOF-525(Zr)@Pt was collected by centrifugation at 8000 rpm for 10 min and washed twice with ethanol and twice with DMF. Finally, MOF-525(Zr)@Pt was redispersed in 6 mL DMF for further use.

**Synthesis of MOF-525(Zr)@Pt@MOF-525(Zr):** In a typical procedure, 6 mL DMF of MOF-525(Zr)@Pt and 0.645 mL precursor solution were mixed, and then the mixed solution was heated at 90°C for 20 h to grow MOF-525(Zr) shell onto the supported MOF-525(Zr)@Pt. After that, the obtained product was collected by centrifugation at 8000 rpm for 10 min and washed twice with DMF and twice with ethanol. Finally, the obtained MOF-525(Zr)@Pt@MOF-525(Zr) was redispersed in 2 mL ethanol, which was directly used as the catalyst for liquid-phase selective hydrogenation.

#### **Synthesis of UiO-66(Zr)@Pt@UiO-66(Zr)<sup>11,2</sup>.**

**Synthesis of UiO-66(Zr):** UiO-66(Zr) was synthesized according to the literature<sup>6</sup> with minor modifications. In a typical procedure, 25 mg H<sub>2</sub>BDC, 33.4 mg ZrCl<sub>4</sub> and 0.7 mL acetic acid were dissolved in 10 mL DMF and placed in 120°C oil bath for a day. The resulting UiO-66 was collected by centrifugation at 8000 rpm for 10 min and washed twice with DMF and twice with ethanol. Finally, the obtained UiO-66(Zr) was redispersed in 6 mL ethanol for further use.

**Synthesis of UiO-66(Zr)@Pt:** In a typical procedure, 6 mL as-synthesized Pt NP solution

(0.6 mM) was added drop by drop into 6 mL ethanol of UiO-66(Zr) under vigorous stirring, and then the mixed solution was further stirred at room temperature for 3 h. Subsequently, UiO-66(Zr)@Pt was collected by centrifugation at 8000 rpm for 10 min and washed twice with DMF. Finally, UiO-66(Zr)@Pt was redispersed in 6 mL DMF for further use.

**Synthesis of UiO-66(Zr)@Pt@UiO-66(Zr):** In a typical procedure, 6 mL DMF of UiO-66(Zr)@Pt and 1.070 mL precursor solution were mixed, and then the mixed solution was heated at 120°C for 10 h to grow UiO-66(Zr) shell onto the supported UiO-66(Zr)@Pt. After that, the obtained product was collected by centrifugation at 8000 rpm for 10 min and washed twice with DMF and twice with ethanol. Finally, the obtained UiO-66(Zr)@Pt@UiO-66(Zr) was redispersed in 6 mL ethanol, which was directly used as the catalyst for liquid-phase selective hydrogenation.

#### **Synthesis of UiO-67(Zr)@Pt@UiO-67(Zr)<sup>24.1</sup>.**

**Synthesis of UiO-67(Zr):** UiO-67(Zr) was synthesized according to the literature<sup>6</sup> with minor modifications. In a typical procedure, 19.36 mg H<sub>2</sub>BPDC and 120 μL triethylamine were dissolved in 5 mL DMF, while 18.64 mg ZrCl<sub>4</sub> and 1.38 mL acetic acid were dissolved in 5 mL DMF. The solutions of H<sub>2</sub>BPDC and ZrCl<sub>4</sub> were mixed in a vial followed by capped and placed in 120°C oven for a day. The resulting UiO-67 was collected by centrifugation at 8000 rpm for 10 min and washed twice with DMF. Finally, the obtained UiO-67 was redispersed in 4 mL DMF for further use.

**Synthesis of UiO-67(Zr)@Pt:** In a typical procedure, 4 mL as-synthesized Pt NP solution (0.6 mM) was added drop by drop into 4 mL DMF of UiO-67(Zr) under vigorous stirring, and then the mixed solution was further stirred at room temperature for 3 h. Subsequently, UiO-67(Zr)@Pt was collected by centrifugation at 8000 rpm for 10 min and washed twice with DMF. Finally, UiO-67(Zr)@Pt was redispersed in 4 mL DMF for further use.

**Synthesis of UiO-67(Zr)@Pt@UiO-67(Zr):** In a typical procedure, 4 mL DMF of UiO-67(Zr)@Pt and 1.150 mL precursor solution were mixed, and then the mixed solution was heated at 120°C for 5 h to grow UiO-67(Zr) shell onto the supported UiO-67(Zr)@Pt. After that, the obtained product was collected by centrifugation at 8000 rpm for 10 min and washed twice with DMF and twice with ethanol. Finally, the obtained

UiO-67(Zr)@Pt@UiO-67(Zr) was redispersed in 4 mL ethanol, which was directly used as the catalyst for liquid-phase selective hydrogenation.

#### **Synthesis of MOF-74(Co)@Pt@MOF-74(Co)<sup>8,4</sup>.**

**Synthesis of MOF-74(Co):** MOF-74(Co) was synthesized according to the literature<sup>7</sup> with minor modifications. In a typical procedure, 28.5 mg Co(NO<sub>3</sub>)<sub>2</sub>·6H<sub>2</sub>O (0.048 mmol), 10 mg DHTA (0.025 mmol 2,5-dihydroxyterephthalic acid) and 0.2 g PVP (MW=8800) were dissolved in 9 mL DMF and 1 mL H<sub>2</sub>O. Subsequently, the solution was heated at 100°C for 3 h. Afterwards, the MOF-74(Co) was collected by centrifugation at 8000 rpm for 5 min and washed twice with DMF. Finally, the obtained MOF-74(Co) was redispersed in 6 ml DMF for further use.

**Synthesis of MOF-74(Co)@Pt:** 2 mL as-synthesized Pt NP solution (0.6 mM) was added drop by drop into 6 mL ethanol of MOF-74(Co) under vigorous stirring, and then the mixed solution was further stirred at room temperature for 2 h. Subsequently, MOF-74(Co)@Pt was collected by centrifugation at 8000 rpm for 5 min and washed twice with DMF. Finally, the obtained MOF-74(Co)@Pt was redispersed in 6 mL DMF, which was directly used for further synthesis of MOF-74(Co)@Pt@MOF-74(Co).

**Synthesis of MOF-74(Co)@Pt@MOF-74(Co):** For synthesis of sandwich MOF-74(Co)@Pt@MOF-74(Co) nanostructure, a precursor solution of MOF-74(Co) was prepared as follows: 14 mg Co(NO<sub>3</sub>)<sub>2</sub>·6H<sub>2</sub>O (0.048 mmol) and 5 mg DHTA (0.025 mmol) were dissolved in 3 mL DMF. In a typical procedure, 6 mL DMF of MOF-74@Pt and 1 mL precursor solution were mixed, and then the mixed solution was heated at 100°C for 2.5 h to grow MOF-74(Co) shell onto the supported MOF-74(Co)@Pt. After that, the obtained product was collected by centrifugation at 8000 rpm for 5 min and washed twice with ethanol. Finally, the obtained MOF-74(Co)@MOF-74(Co) was redispersed in 2 mL ethanol, which was directly used as the catalyst for liquid-phase selective hydrogenation.

**Synthesis of Pt/Fe<sub>2</sub>O<sub>3</sub>.** 10 mg Fe<sub>2</sub>O<sub>3</sub> was dispersed in 10 mL ethanol, and then 4 mL pre-synthesized Pt NP solution was added drop by drop into the above solution. The mixture was kept overnight under vigorous stirring. Subsequently, Pt/Fe<sub>2</sub>O<sub>3</sub> was collected by

centrifugation at 8000 rpm for 10 min and washed twice with ethanol. Finally, the obtained Pt/Fe<sub>2</sub>O<sub>3</sub> was redispersed in 4 mL ethanol, which was directly used as the catalyst for liquid-phase selective hydrogenation.

**Catalytic selective hydrogenation of *trans*-cinnamaldehyde to cinnamyl alcohol.** In a typical procedure, each sample containing the same amount of Pt NPs (0.23 mg) was dispersed in 2 mL ethanol solution, and then 0.2 mL H<sub>2</sub>O and 0.05 mL cinnamaldehyde (0.4 mmol) were added into the above solution. Subsequently, the solution was transferred into a Teflon-lined stainless steel autoclave, the autoclave was purged with H<sub>2</sub> for 4 times, and the final H<sub>2</sub> pressure of the autoclave was set at 3.0 MPa. During the catalytic process, the reaction solution was magnetically stirred with the speed of 500 rpm at room temperature for the desired time. It should be pointed out that at this stirring speed, the influence of external and internal mass transport on catalytic properties was excluded. After that, the catalysts were separated by centrifugation, and washed with ethanol for reusing; while the obtained reaction solution was filtered through a filter membrane (0.22 μm), and then was analyzed by gas chromatography-mass spectrometry (GC-MS, Thermo DSQ, column: TR-5MS) and gas chromatography (GC, Shimadzu, GC-2010 Plus, column: Rtx-5, 30 m × 0.25 mm × 0.25 μm).

**Catalytic selective hydrogenation of furfural to furfuryl alcohol.** In a typical procedure, each sample containing the same amount of Pt NPs (0.23 mg) was dispersed in 2 mL ethanol solution, and then 0.2 mL H<sub>2</sub>O and 33 μL furfural (0.4 mmol) were added into the above solution. Subsequently, the solution was transferred into a Teflon-lined stainless steel autoclave, the autoclave was purged with H<sub>2</sub> for 4 times, and the final H<sub>2</sub> pressure of the autoclave was set at 3.0 MPa. During the catalytic process, the reaction solution was magnetically stirred with the speed of 500 rpm at room temperature for the desired time. It should be pointed out that at this stirring speed, the influence of external and internal mass transport on catalytic properties was excluded. After that, the catalysts were separated by centrifugation, and washed with ethanol for reusing; while the obtained reaction solution was filtered through a filter membrane (0.22 μm), and then was analyzed by gas

chromatography-mass spectrometry (GC-MS, Thermo DSQ, column: TR-5MS) and gas chromatography (GC, Shimadzu, GC-2010 Plus, column: Rtx-5, 30 m × 0.25 mm × 0.25 μm).

**Catalytic selective hydrogenation of 3-methyl-2-butenal to 3-methyl-2-butenol.** In a typical procedure, each sample containing the same amount of Pt NPs (0.23 mg) was dispersed in 2 mL isopropanol solution, and then 40 μL 3-methyl-2-butenal (0.4 mmol) was added into the above solution. Subsequently, the solution was transferred into a Teflon-lined stainless steel autoclave, the autoclave was purged with H<sub>2</sub> for 4 times, and the final H<sub>2</sub> pressure of the autoclave was set at 3.0 MPa. During the catalytic process, the reaction solution was magnetically stirred with the speed of 500 rpm at room temperature for the desired time. It should be pointed out that at this stirring speed, the influence of external and internal mass transport on catalytic properties was excluded. After that, the catalysts were separated by centrifugation, and washed with isopropanol for reusing; while the obtained reaction solution was filtered through a filter membrane (0.22 μm), and then was analyzed by gas chromatography-mass spectrometry (GC-MS, Thermo DSQ, column: TR-5MS) and gas chromatography (GC, Shimadzu, GC-2010 Plus, column: Rtx-5, 30 m × 0.25 mm × 0.25 μm).

**Catalytic selective hydrogenation of acrolein to allyl alcohol.** In a typical procedure, each sample containing the same amount of Pt NPs (0.23 mg) was dispersed in 1.8 mL chloroform solution, and then 26.5 μL acrolein (0.4 mmol) was added into the above solution. Subsequently, the solution was transferred into a Teflon-lined stainless steel autoclave, the autoclave was purged with H<sub>2</sub> for 4 times, and the final H<sub>2</sub> pressure of the autoclave was set at 3.0 MPa. During the catalytic process, the reaction solution was magnetically stirred with the speed of 500 rpm at room temperature for the desired time. It should be pointed out that at this stirring speed, the influence of external and internal mass transport on catalytic properties was excluded. After that, the catalysts were separated by centrifugation, and washed with chloroform solution for reusing. An aliquot of the reaction mixture was evaporated to dryness using a rotary evaporator at room temperature. The residue was dissolved in chloroform-d

and analyzed by  $^1\text{H}$  NMR (400 MHz, Bruker, USA)

### Supplementary theoretical calculation

All spin-polarised DFT computations were performed using the Vienna *ab initio* simulation package (VASP) based on the projector augmented wave (PAW) method<sup>8-10</sup>. Electron-ion interactions were described using standard PAW potentials with valence configurations of  $2s^22p^63s^23d^6$  for Fe,  $2s^22p^63s^23d^4$  for Cr,  $3s^23p^5$  for Cl,  $2s^22p^2$  for C,  $2s^22p^4$  for O, and  $1s^1$  for H<sup>11, 12</sup>. A plane-wave basis set was employed to expand the smooth part of wave functions with a cut-off kinetic energy of 520 eV. For the electron-electron exchange and correlation interactions, the functional parameterized by Perdew-Burke-Ernzerhof (PBE)<sup>13</sup>, a form of the general gradient approximation (GGA), was used throughout. Due to insufficient consideration of the on-site Columbic repulsion, between the Fe or Cr *d* electrons, DFT might fail to describe the electronic structure of the MIL-101. To overcome this shortcoming, the GGA+U approach was used with U-J = 6.0 eV for the Fe or Cr atoms<sup>14</sup>.

Since the unit cell of MIL-101 contained more than 10,000 atoms, the calculation on such big systems was beyond the computational power of current supercomputer. Considering that the building block of MIL-101 was a super tetrahedral cell, which included four  $\text{Fe}_3\text{OCl}(\text{COO})_6\text{H}_2\text{O}$  or  $\text{Cr}_3\text{OCl}(\text{COO})_6\text{H}_2\text{O}$  trimers connected by the organic BDC linkers, the active reaction centre for MIL-101 was 5-coordinated metal ions in trimers for adsorption of cinnamaldehyde. In this regard, only interactions between trimer clusters and molecules were theoretically investigated here. All cluster systems were in a  $20 \times 20 \times 20 \text{ \AA}^3$  box to ensure the periodic images to be well separated. The Brillouin-zone integrations were performed using the Gamma-point only grid. When the geometries were optimized, all atoms were allowed to relax. And the atomic structures were optimized until the residual forces were below  $0.01 \text{ eV/\AA}$ .

The Pt (111) surface was modeled by a super cell comprising a four-layer slab, separated by a vacuum region of six-layer equivalent thickness. The methods proposed by Makov *et al.* and Neugebauer *et al.* were used to correct for the surface dipole moment<sup>15,16</sup>. The Brillouin-zone integrations were based on a  $\Gamma$ -centered ( $6 \times 6 \times 1$ ) k-point grid for the ( $2 \times 2$ ) surface cell. In this study, one  $\text{H}_2$  molecule was dissociatively adsorbed at face centered

cubic sites in each ( $2 \times 2$ ) surface cell. When the atomic geometries were optimized, the top two surface layers and the adsorbed H atoms were allowed to relax, while the lower two layers were fixed at the ideal bulk-like position. The ionic positions were optimized until all forces were smaller than 0.01 eV/Å. We removed several electrons from the surface to make a “positive surface”. The charge values of atoms were analysed by using Bader method<sup>17</sup>. The binding energies of hydrogen atoms ( $\Delta E_H$ ) on the Pt (111) ( $2 \times 2$ ) surface were calculated according to the broadly used equation:

$$\Delta E_H = E_{tot} - E_{H_2} - E_{surf}$$

Where  $E_{tot}$  was the total energy of surface with dissociatively adsorbed  $H_2$ ,  $E_{surf}$  was the surface energy, and  $E_{H_2}$  was the energy of an isolated  $H_2$  molecule.

### Supplementary Note 1

**General synthesis of sandwich MIL-101@Pt@MIL-101 nanostructures.** In brief, MIL-101(Fe) and MIL-101(Cr) cores were firstly prepared by solvothermal methods<sup>3,4</sup>. Both of the products were uniform octahedra with average diameters of ~296 nm and ~243 nm for MIL-101(Fe) and MIL-101(Cr) (Supplementary Figs 2 and 3), respectively, sharing the identical crystal parameters (Supplementary Fig. 4). Subsequently, pre-synthesized, PVP-stabilized Pt NPs of ~2.8 nm in diameter were homogeneously adsorbed onto the surface of MIL-101(Fe) or MIL-101(Cr) to form the supported MIL-101(Fe)@Pt and MIL-101(Cr)@Pt (Supplementary Figs 5-7). Finally, the sandwich nanostructures were generated by coating another MIL-101 shells with different thickness (Supplementary Figs 8-13).

### Supplementary Note 2

**Characterization of sandwich structures with thin shell thickness.** Among the sandwich MIL-101@Pt@MIL-101 nanostructures, MIL-101(Cr)@Pt@MIL-101(Fe)<sup>2,9</sup> has the thinnest shell thickness, and its high angle annular dark field scanning transmission electron microscopy (HAADF-STEM) images indicate the well-defined sandwich structure, in which the embedded tiny Pt NPs could be clearly distinguished (Fig.11).

### Supplementary Note 3

**DFT calculation on the interaction between A and MIL-101 cell.** The calculated adsorption energy of A over Fe<sub>3</sub>OCl(COO)<sub>6</sub>H<sub>2</sub>O and Cr<sub>3</sub>OCl(COO)<sub>6</sub>H<sub>2</sub>O trimers is -1.26 eV and -1.01 eV, respectively (Fig. 2). Obviously, binding between the trimers and A through the Fe-O or Cr-O interaction is thermodynamically preferred. Moreover, the interaction between A and Fe<sub>3</sub>OCl(COO)<sub>6</sub>H<sub>2</sub>O is stronger as evidenced by: (i) the Fe-O bond length is 2.05 Å, ~3% shorter than the Cr-O bond length of 2.115 Å (Fig. 2); and (ii) the hybridization between Fe 3*d* state with O 2*p* state is stronger than that between Cr 3*d* state and O 2*p* state (Supplementary Figs 20-22).

### Supplementary Note 4



**Binding energy of different metal elements in supported MIL-101@Pt.** X-ray photoelectron spectroscopy (XPS) measurements indicate that as for MIL-101(Fe)@Pt, the binding energy of Pt 4f<sub>7/2</sub> is altered from 71.1 to 71.6 eV accompanied with shifts of Fe 2p<sub>3/2</sub> and O1s binding energies from 711.8 to 711.2 eV and 531.8 to 531.5 eV, respectively, implying that the electrons of Pt NPs are partially transferred to MIL-101(Fe) (Fig. 3a, b and d). As comparison, there is no obvious electron transfer between MIL-101(Cr) and Pt NPs (Fig. 3a, c and d).

### Supplementary Note 5

**Selective hydrogenation of acrolein by different catalysts.** Acrolein is the simplest  $\alpha$ ,  $\beta$ -unsaturated aldehyde. Because there are no functional groups on the C=C bond, it becomes more difficult to realize hydrogenation of C=O bond in acrolein with high selectivity compared with other  $\alpha$ ,  $\beta$ -unsaturated aldehydes. During the past few decades, many efforts have been devoted to improve the selectivity toward the desired allyl alcohol (Supplementary Table 8). As examples, using bimetals or alloy may favour activation of the C=O group and accordingly the hydrogenation of the C=O group rather than the C=C group occurs; modifying the surface of noble metal NPs with different ligands can improve the selectivity of unsaturated alcohols; while using different support materials gives rise to altered hydrogenation selectivity due to synergistic interactions between the supports and metal NPs. Among all the reported results, several representative works are chosen for comparison. 9Ag-0.75In/SiO<sub>2</sub> catalyzes hydrogenation of acrolein to allyl alcohol with the selectivity of 61% at the conversion of 97% under the temperature of 240°C and 2 MPa<sup>18</sup>. It is noticed that the selectivity of allyl alcohol is significantly improved in contrast with the supported Ag/SiO<sub>2</sub> catalysts reported in the literatures<sup>19-21</sup>. Au<sub>25</sub>(SR)<sub>18</sub>/Fe<sub>2</sub>O<sub>3</sub> catalyzes hydrogenation of acrolein to allyl alcohol with the selectivity of 92% at the conversion of 47% under 0°C, 0.1 MPa H<sub>2</sub>, and 3 h for reaction<sup>22</sup>, but it is generally accepted that detachment of ligands usually occurs during the repeated tests. Using homogeneous gold clusters stabilized by *tert*-butyl(naphthalen-1-yl)phosphine oxide as catalysts achieves the 99% selectivity of allyl alcohol with the conversion of 60% under the conditions of THF as solvent, 40°C, 4 MPa H<sub>2</sub> and 18 h for reaction<sup>23</sup>. It needs to be noted that the reaction rate is rather slow and

homogeneous Au NPs are hard to be recycled during the process. Impressively, sandwich MIL-101(Fe)@Pt@MIL-101(Fe)<sup>22.0</sup> nanostructures in this work could exhibit the excellent selectivity of allyl alcohol (97.3%) with the conversion of 52.7% under the conditions of chloroform-d as solvent, room temperature, 3.0 MPa H<sub>2</sub> and 3 h for reaction, which is comparable to the best results obtained from the homogeneous and heterogeneous catalysts reported to date (Supplementary Table 8). More importantly, it is easily understood that the sandwich catalysts developed in this work are readily recycled and have relatively high stability because the Pt NPs are firmly embedded inside the MIL-101 matrixes.

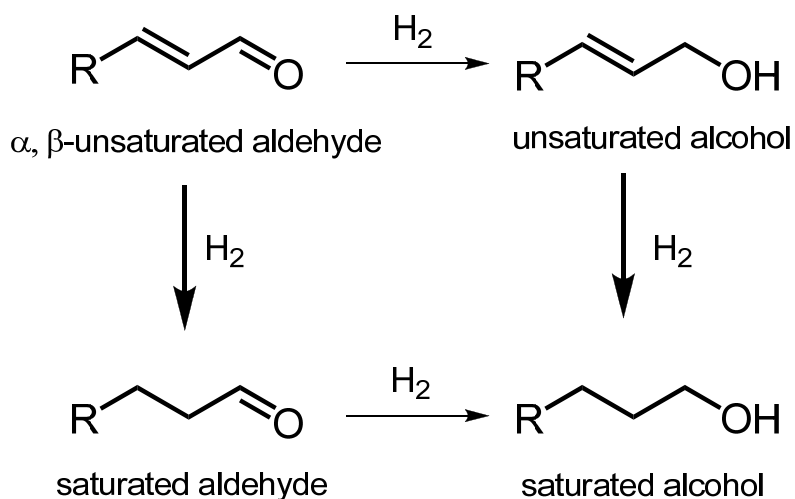

**Supplementary Figure 1 | Selective hydrogenation of  $\alpha, \beta$ -unsaturated aldehyde.**

Since the C=O group, C=C group or both in  $\alpha, \beta$ -unsaturated aldehyde (**A**) are possibly hydrogenated, the final products should be a mixture of the unsaturated alcohol (**B**), saturated aldehyde (**C**) and saturated alcohol (**D**). It should be pointed out that selective hydrogenation of the C=O group against the conjugated C=C group in **A** is an indispensable choice to produce **B**, because of its limited source from the natural products and the widespread demand by flavouring, perfume and pharmaceutical industries. However, until now the development of effective catalysts capable of converting **A** into the desired **B** with excellent selectivity, high yield and low cost remains a great challenge, because hydrogenation of the C=O group is thermodynamically unfavored compared to the conjugated C=C group.

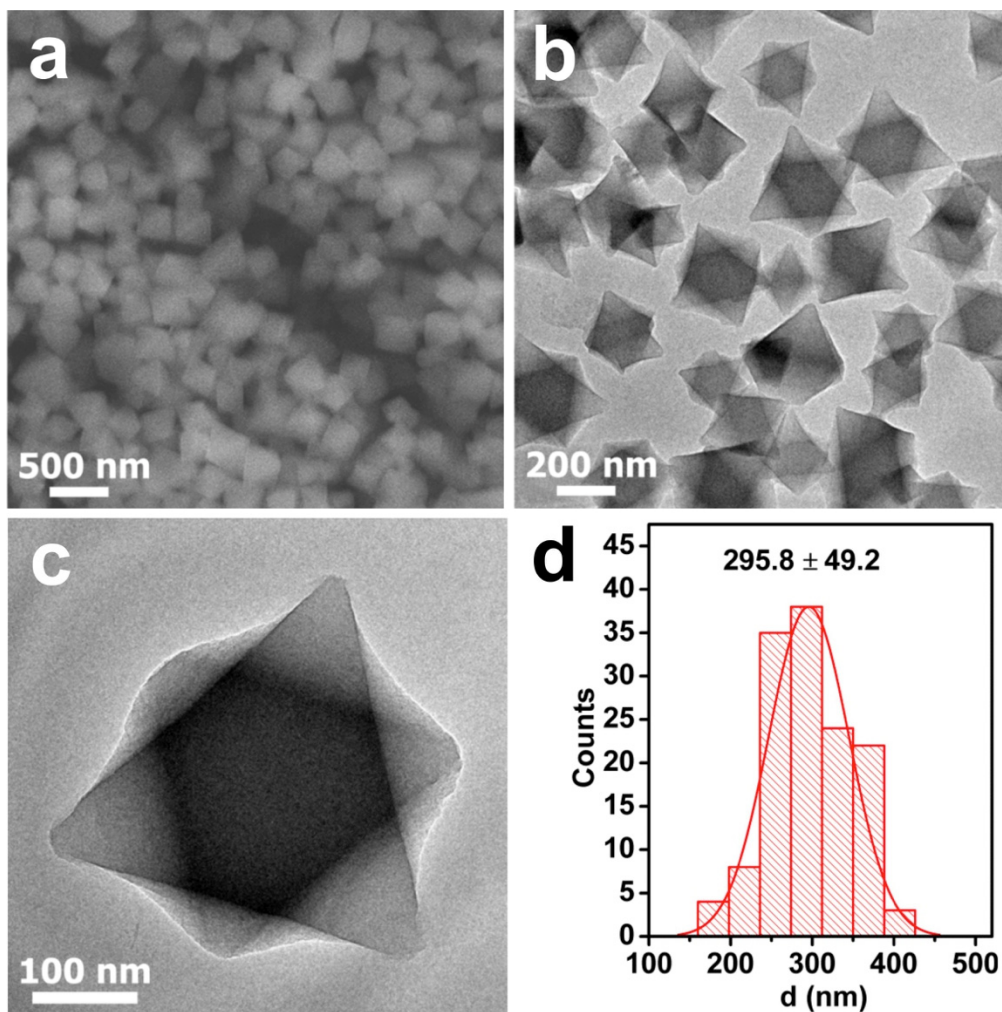

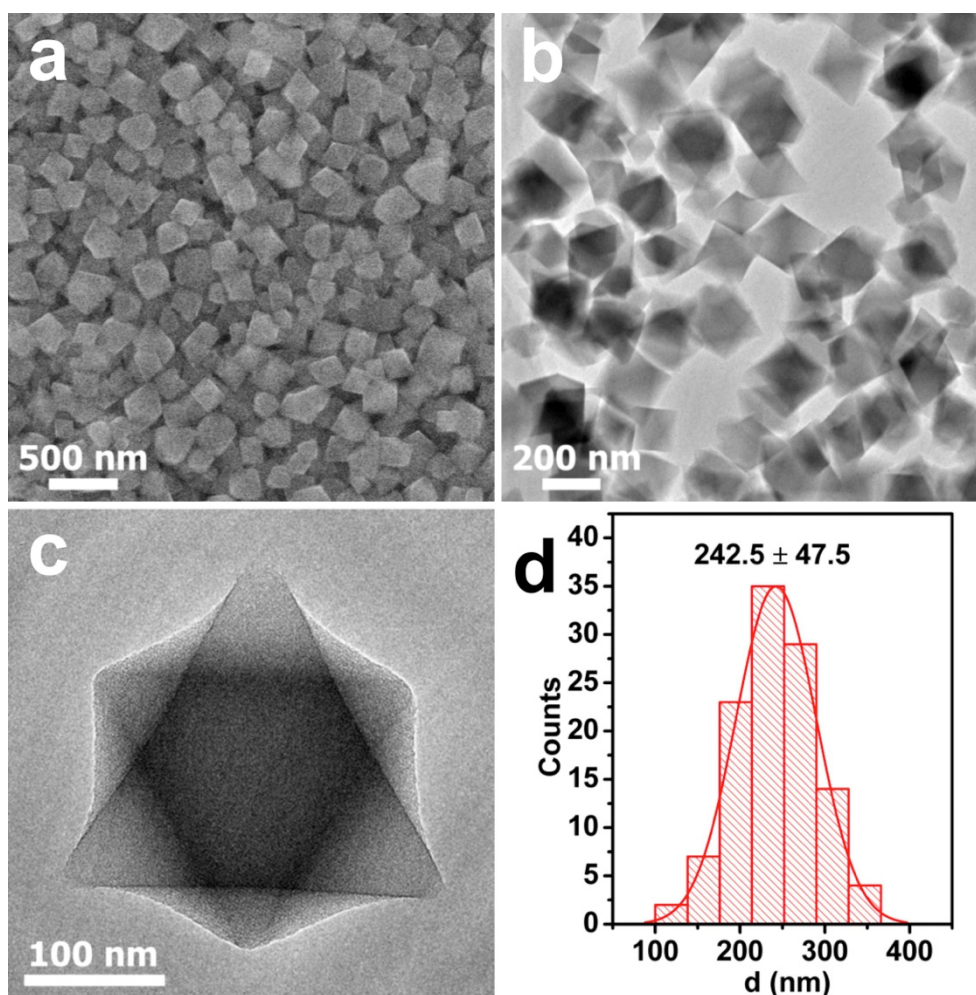

**Supplementary Figure 3 | Morphology of MIL-101(Cr).** **a**, SEM image of MIL-101(Cr). **b**, Large-scale TEM image of MIL-101(Cr), and **c**, TEM image of single MIL-101(Cr). **d**, Corresponding size histogram of MIL-101(Cr) shown in **a**.

As-obtained MIL-101(Cr) cores are characteristic of octahedral morphology with the average size of  $\sim 243$  nm.

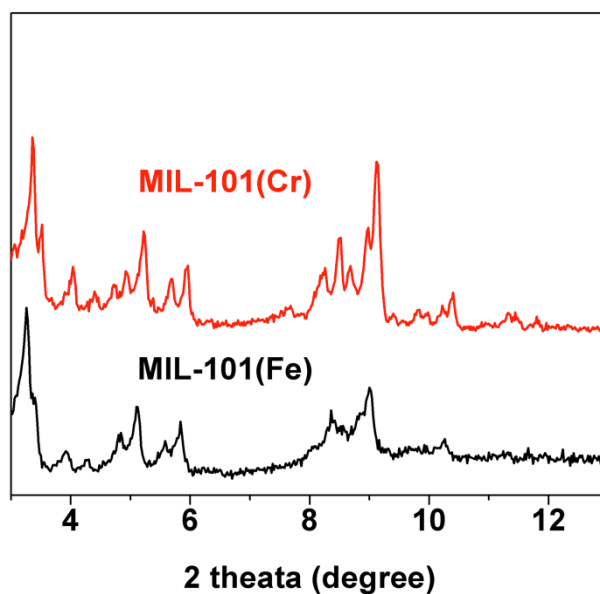

**Supplementary Figure 4 | XRD patterns of as-synthesized MIL-101(Cr) and MIL-101(Fe).**

As shown in Supplementary Fig. 4, the obtained MIL-101(Cr) (red curve) and MIL-101(Fe) (black curve) have the similar crystalline structures, which are consistent with those reported in the literatures<sup>3,4</sup>.

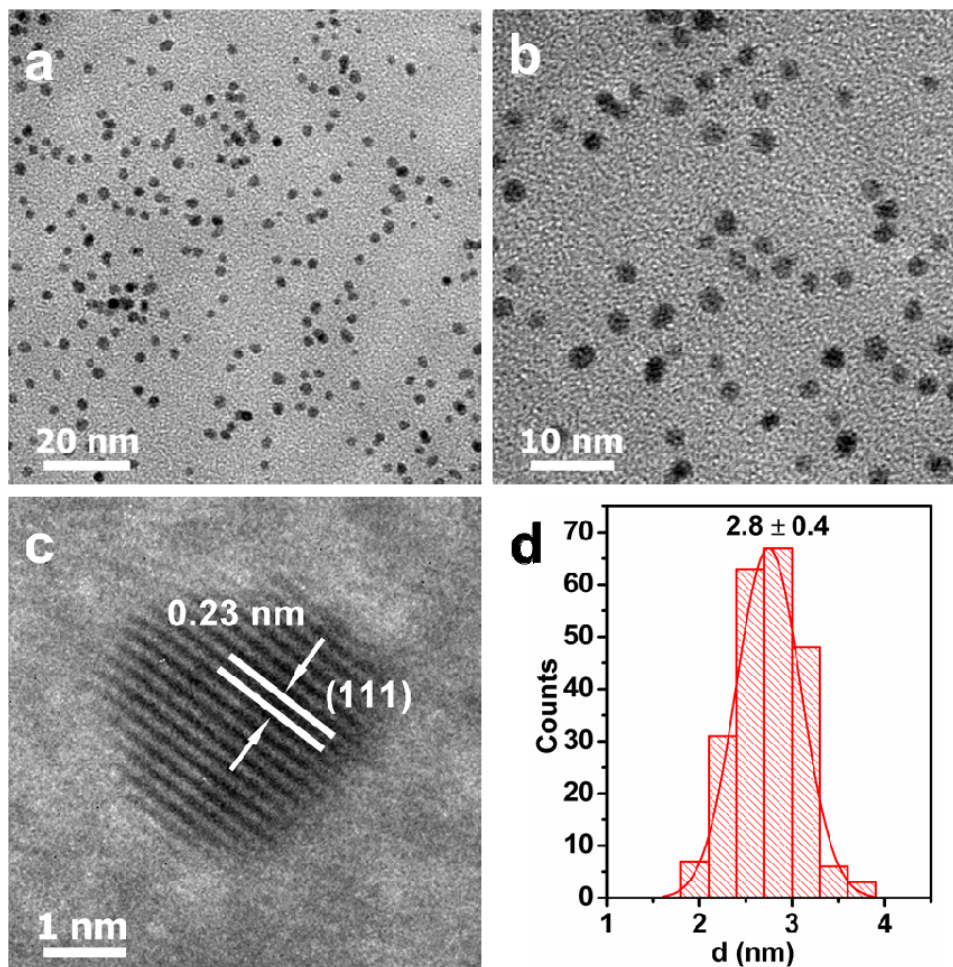

**Supplementary Figure 5 | Morphology of Pt NPs.** **a**, TEM image of as-synthesized Pt NPs. **b**, Magnified TEM image of Pt NPs. **c**, HRTEM image of Pt NPs. **d**, Corresponding particle size histogram of Pt NPs.

As displayed in Supplementary Fig. 5, the obtained Pt NPs have the average diameter of  $\sim 2.8$  nm. HRTEM image further indicates that each Pt NP is highly crystalline with the interplanar spacing of 0.23 nm, corresponding to the (111) plane of face centered cubic (fcc) Pt.

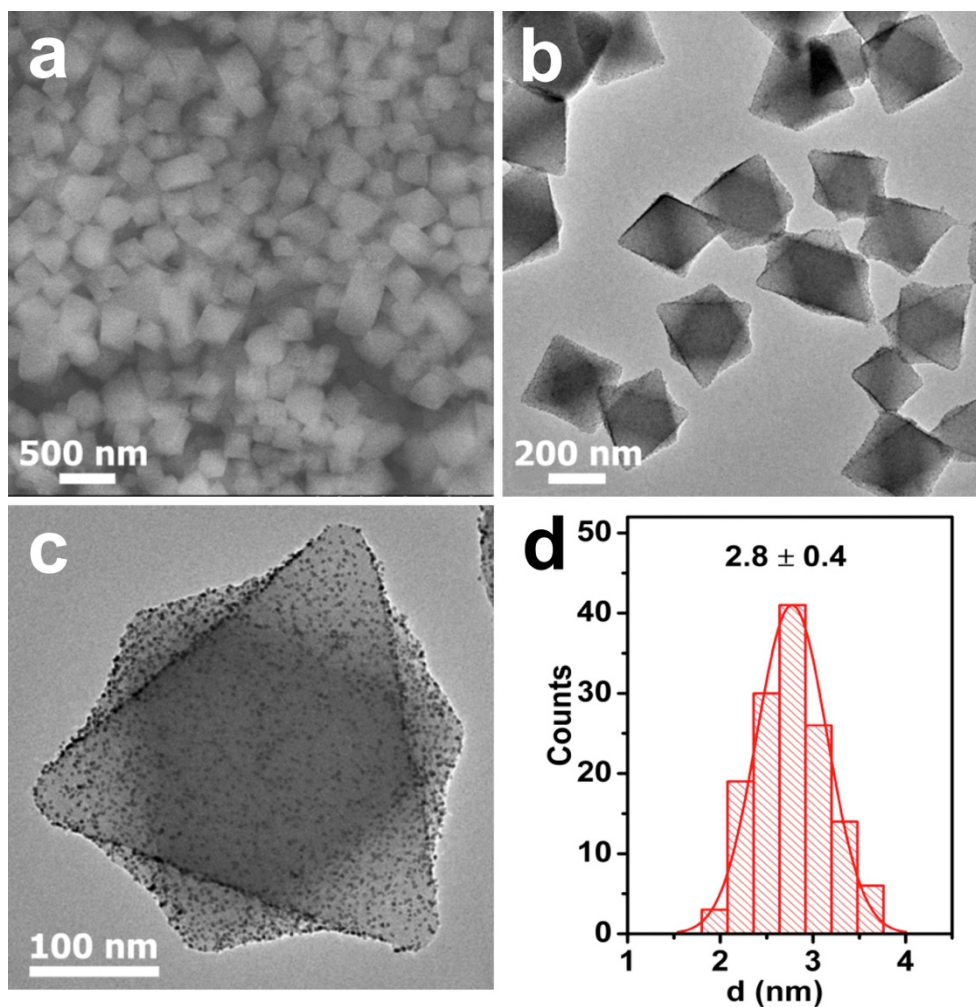

**Supplementary Figure 6 | Morphology of MIL-101(Fe)@Pt.** **a**, SEM image of supported MIL-101(Fe)@Pt. **b**, Large-scale TEM image of supported MIL-101(Fe)@Pt, and **c**, TEM image of single supported MIL-101(Fe)@Pt. **d**, Corresponding size histogram of Pt NPs.

It is clear that the Pt NPs are homogeneously dispersed on the surface of MIL-101(Fe) without significant aggregation, and the corresponding average diameter of Pt NPs is about 2.8 nm.



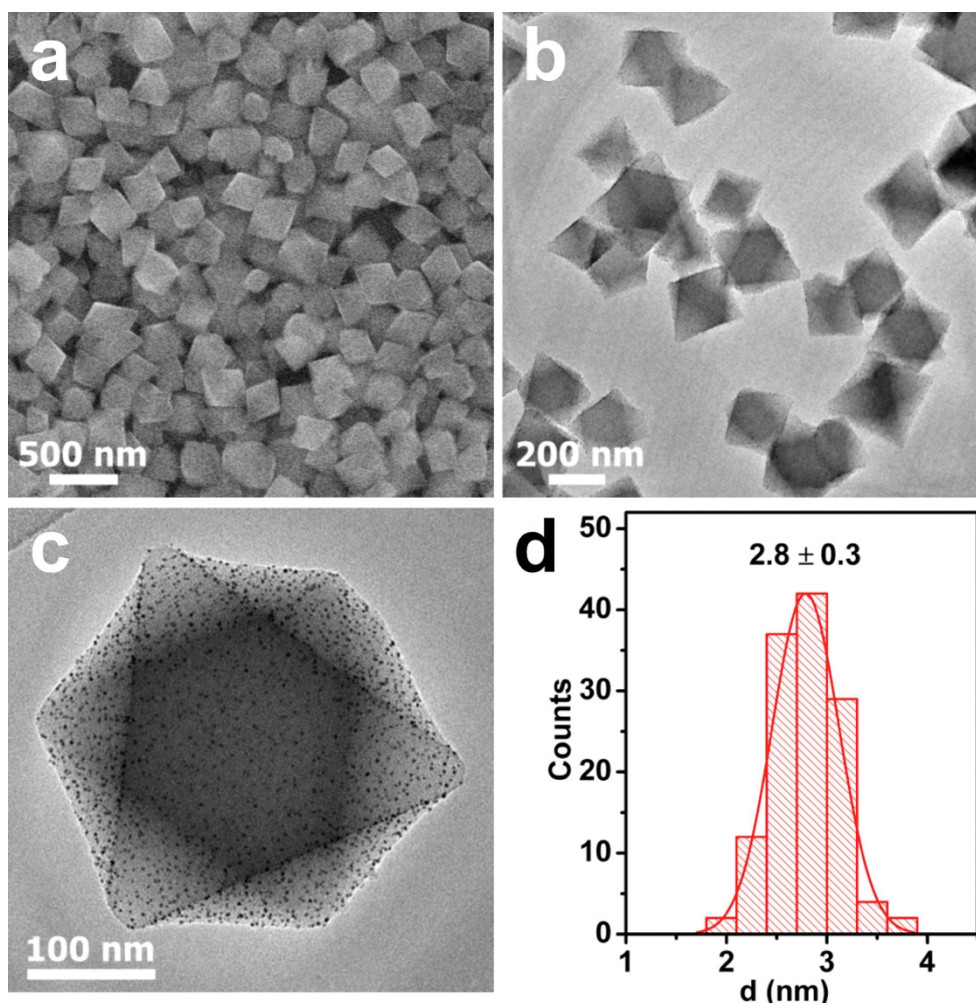

**Supplementary Figure 7 | Morphology of MIL-101(Cr)@Pt.** **a**, SEM image of supported MIL-101(Cr)@Pt. **b**, Large-scale TEM image of MIL-101(Cr)@Pt, and **c**, TEM image of single MIL-101(Cr)@Pt. **d**, Corresponding size histogram of Pt NPs.

It is clear that the Pt NPs are homogeneously dispersed on the surface of MIL-101(Cr) without significant aggregation, and the corresponding average diameter of Pt NPs is about 2.8 nm.

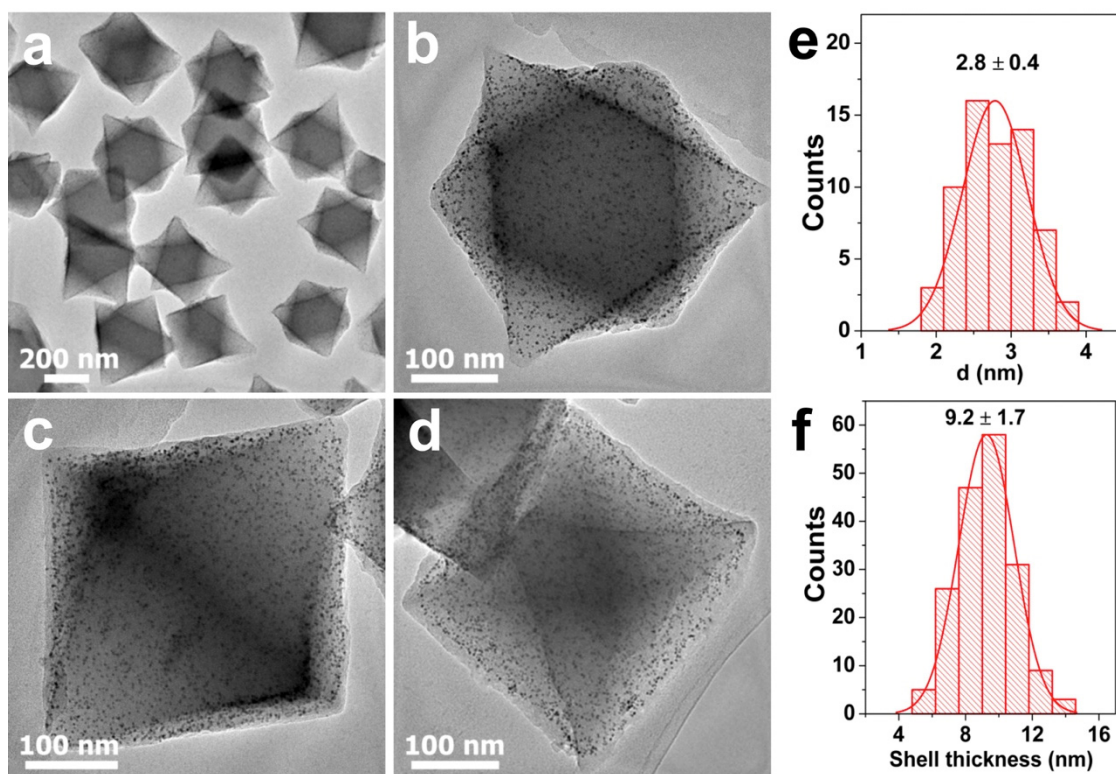

**Supplementary Figure 8 | Morphology of MIL-101(Fe)@Pt@MIL-101(Fe)<sup>9.2</sup>.** **a**, Large-scale TEM image of MIL-101(Fe)@Pt@MIL-101(Fe)<sup>9.2</sup>. **b, c, d**, TEM images of single MIL-101(Fe)@Pt@MIL-101(Fe)<sup>9.2</sup> observed from different angles. **e, f**, Corresponding size histograms of Pt NPs and shell thickness, respectively.

As displayed in Supplementary Fig. 8, the obtained composites are characteristic of sandwich structures, where Pt NPs with average diameter of ~2.8 nm are embedded between MIL-101(Fe) cores and MIL-101(Fe) shells. The shell thickness is ~9.2 nm, obtained from the statistical results based on TEM images (Supplementary Fig. 8f).

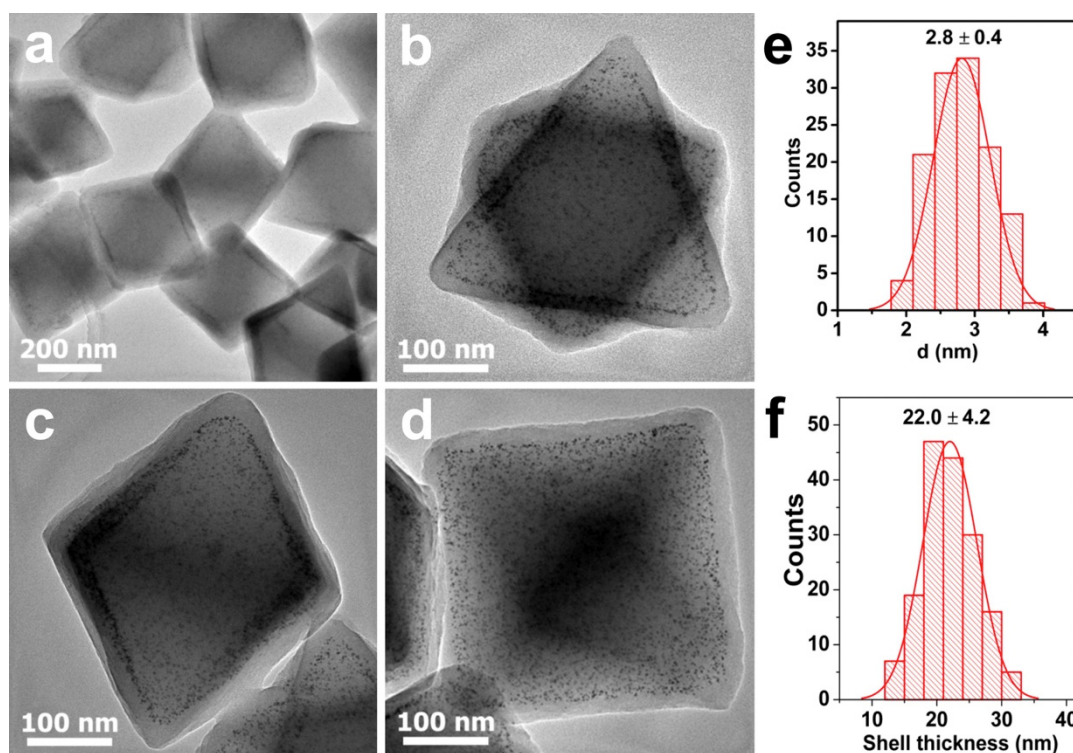

**Supplementary Figure 9 | Morphology of MIL-101(Fe)@Pt@MIL-101(Fe)<sup>22.0</sup>.** **a**, Large-scale TEM image of MIL-101(Fe)@Pt@MIL-101(Fe)<sup>22.0</sup>. **b**, **c**, **d**, TEM images of single MIL-101(Fe)@Pt@MIL-101(Fe)<sup>22.0</sup> observed from different angles. **e**, **f**, Corresponding size histograms of Pt NPs and shell thickness, respectively.

As shown in Supplementary Fig. 9, the obtained composites are characteristic of sandwich structures, where Pt NPs with average diameter of  $\sim 2.8$  nm are embedded between MIL-101(Fe) cores and MIL-101(Fe) shells. The shell thickness is  $\sim 22.0$  nm, obtained from the statistical results based on TEM images (Supplementary Fig. 9f).

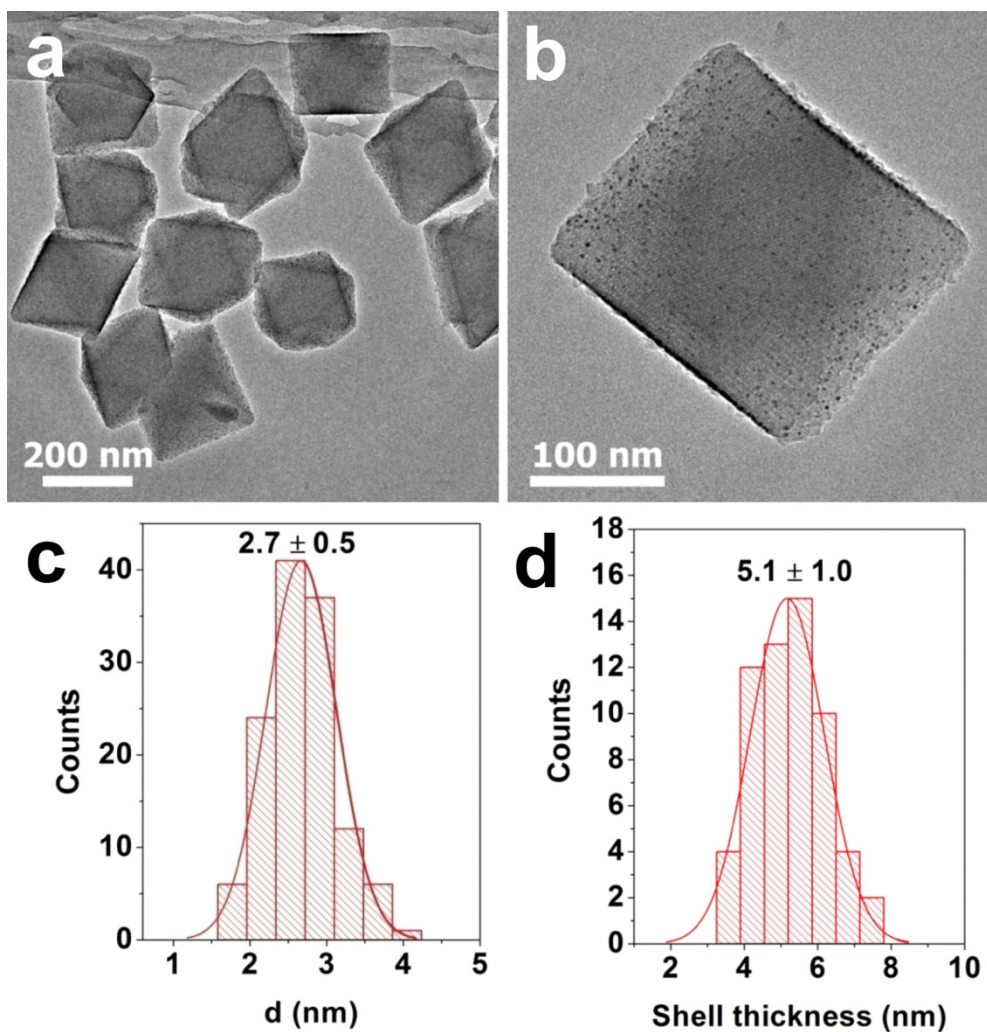

**Supplementary Figure 10 | Morphology of MIL-101(Cr)@Pt@MIL-101(Cr)<sup>5.1</sup>.** **a**, Large-scale TEM image of MIL-101(Cr)@Pt@MIL-101(Cr)<sup>5.1</sup>. **b**, TEM images of single MIL-101(Cr)@Pt@MIL-101(Cr)<sup>5.1</sup>. **c**, **d**, Corresponding size histograms of Pt NPs and shell thickness, respectively.

As shown in Supplementary Fig. 10, the obtained composites are characteristic of sandwich structures, where Pt NPs with average diameter of  $\sim 2.7$  nm are embedded between MIL-101(Cr) cores and MIL-101(Cr) shells. The shell thickness is  $\sim 5.1$  nm, obtained from the statistical results based on TEM images.

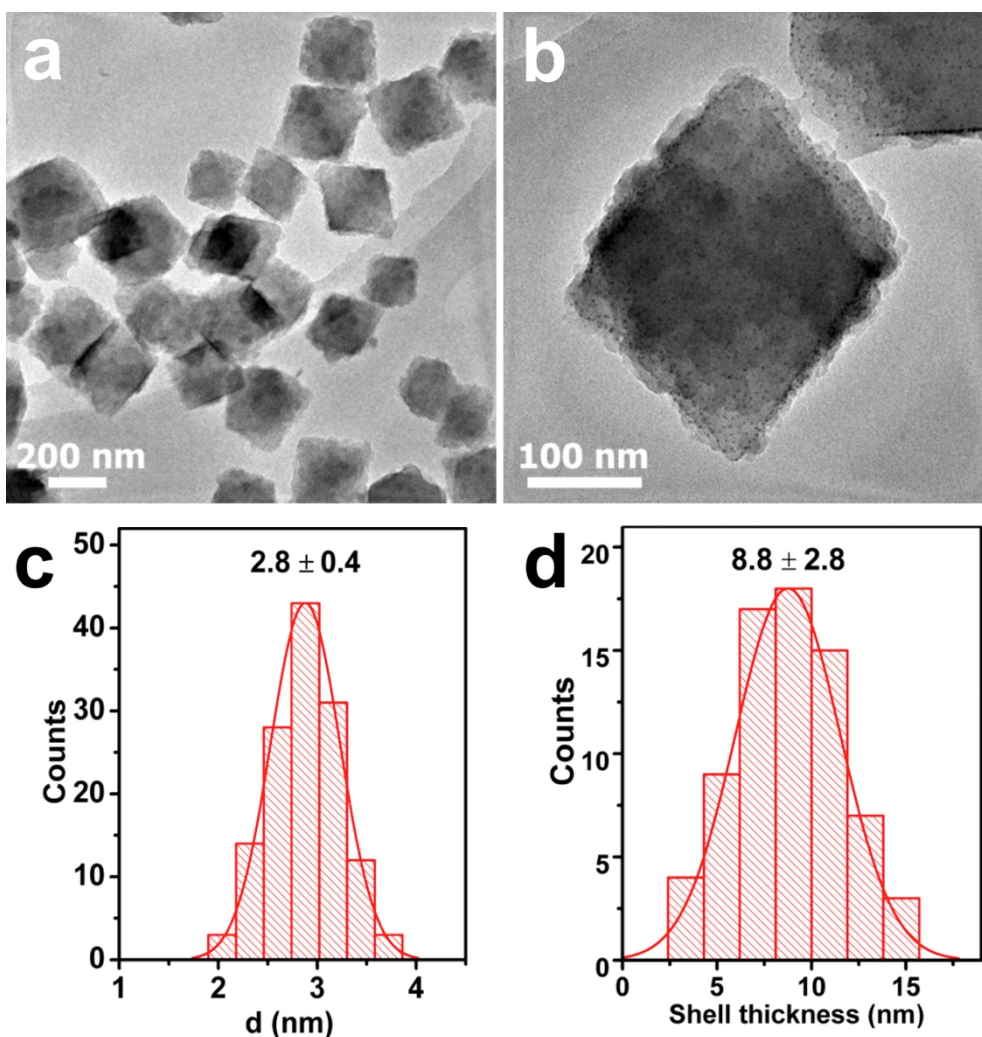

**Supplementary Figure 11 | Morphology of MIL-101(Cr)@Pt@MIL-101(Fe)<sup>8.8</sup>.** **a**, Large-scale TEM image of MIL-101(Cr)@Pt@MIL-101(Fe)<sup>8.8</sup>. **b**, TEM images of single MIL-101(Cr)@Pt@MIL-101(Fe)<sup>8.8</sup>. **c**, **d**, Corresponding size histograms of Pt NPs and shell thickness, respectively.

As shown in Supplementary Fig. 11, the obtained composites are characteristic of sandwich nanostructures, where Pt NPs with average diameter of  $\sim 2.8$  nm are embedded between MIL-101(Cr) cores and MIL-101(Fe) shells. The shell thickness is  $\sim 8.8$  nm, obtained from the statistical results based on TEM images (Supplementary Fig. 11d).

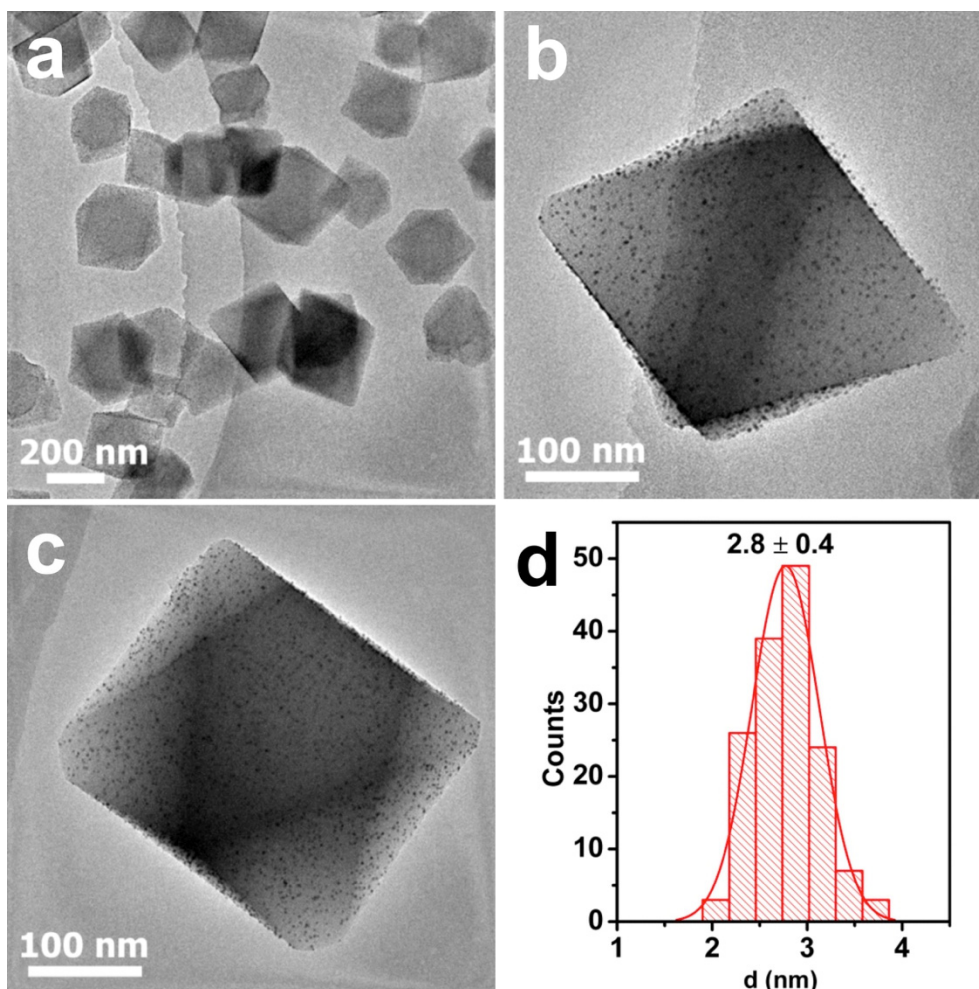

**Supplementary Figure 12 | Morphology of MIL-101(Cr)@Pt@MIL-101(Fe)<sup>2.9</sup>.** **a**, Large-scale TEM image of MIL-101(Cr)@Pt@MIL-101(Fe)<sup>2.9</sup>. **b, c**, TEM images of single MIL-101(Cr)@Pt@MIL-101(Fe)<sup>2.9</sup> observed from different angles. **d**, Corresponding size histograms of Pt NPs.

As displayed in Supplementary Fig. 12, the obtained composites are characteristic of sandwich nanostructures, where Pt NPs with average diameter of  $\sim 2.8$  nm are embedded between MIL-101(Cr) cores and MIL-101(Fe) shells. It also needs to be pointed out that the MIL-101(Fe) shells are difficult to be discerned due to its ultrathin thickness, low contrast with the MIL-101(Cr) cores, and instability under illumination of high energy electron beam. Therefore, formation of MIL-101(Fe) shells of ultrathin thickness is distinguished by XPS survey (Supplementary Fig. 13).

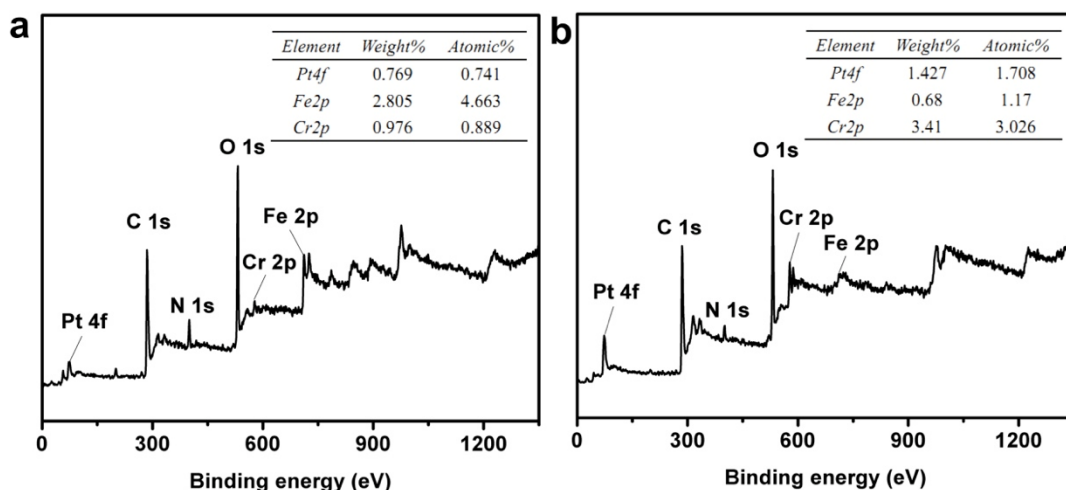

**Supplementary Figure 13 | XPS spectra of MIL-101(Cr)@Pt@MIL-101(Fe). a,** MIL-101(Cr)@Pt@MIL-101(Fe)<sup>8.8</sup>, and **b,** MIL-101(Cr)@Pt@MIL-101(Fe)<sup>2.9</sup>. Inserted tables are the weight and atomic ratio of different elements.

As shown in Supplementary Fig. 12, it is hard to accurately measure the shell thickness of MIL-101(Cr)@Pt@MIL-101(Fe)<sup>2.9</sup> based on the TEM images, because it is very thin and has low contrast with MIL-101(Cr) core. Herein, we estimate the shell thickness by using the XPS data. The elemental analysis result based on XPS spectrum indicates that the atomic ratio of Cr and Fe is about 0.889/4.663 for MIL-101(Cr)@Pt@MIL-101(Fe)<sup>8.8</sup> (Supplementary Fig. 13a). Assuming that MIL-101(Fe) is homogeneously grown on the surface of MIL-101(Cr) (Fig. 1h, and Supplementary Fig. 11), we can evaluate the detection depth of electron beam of XPS, according to the hypothesis that the detectable thickness of MIL-101(Cr) cores and MIL-101(Fe) shells is approximately equal to the measured atomic ratio of Cr and Fe due to the same crystal structure (Supplementary Fig. 4)<sup>3,4</sup>. The detailed calculation is shown as follows: thickness(Cr)/thickness(Fe) =  $x/8.8 = 0.889/4.663$ , so  $x$  is equal to  $\sim 1.7$  nm.

Since the detectable thickness of MIL-101(Cr) core is about 1.7 nm for MIL-101(Cr)@Pt@MIL-101(Fe)<sup>8.8</sup>, one can easily concluded that the detection depth of XPS electron beam is around 10.5 nm after adding the MIL-101(Fe) shell thickness ( $\sim 8.8$  nm). We also notice that the calculated detection depth of XPS electron beam is very close to the reported value in the literature<sup>24</sup>.

As for MIL-101(Cr)@Pt@MIL-101(Fe)<sup>2.9</sup> (Fig. 1j and Supplementary Fig. 12), we also

apply this method to estimate the thickness of MIL-101(Fe) shells. The atomic ratio of Cr and Fe is about 3.026/1.17 (Supplementary Fig. 13b), so the thickness of MIL-101(Fe) thin shell is calculated to be about 2.9 nm.



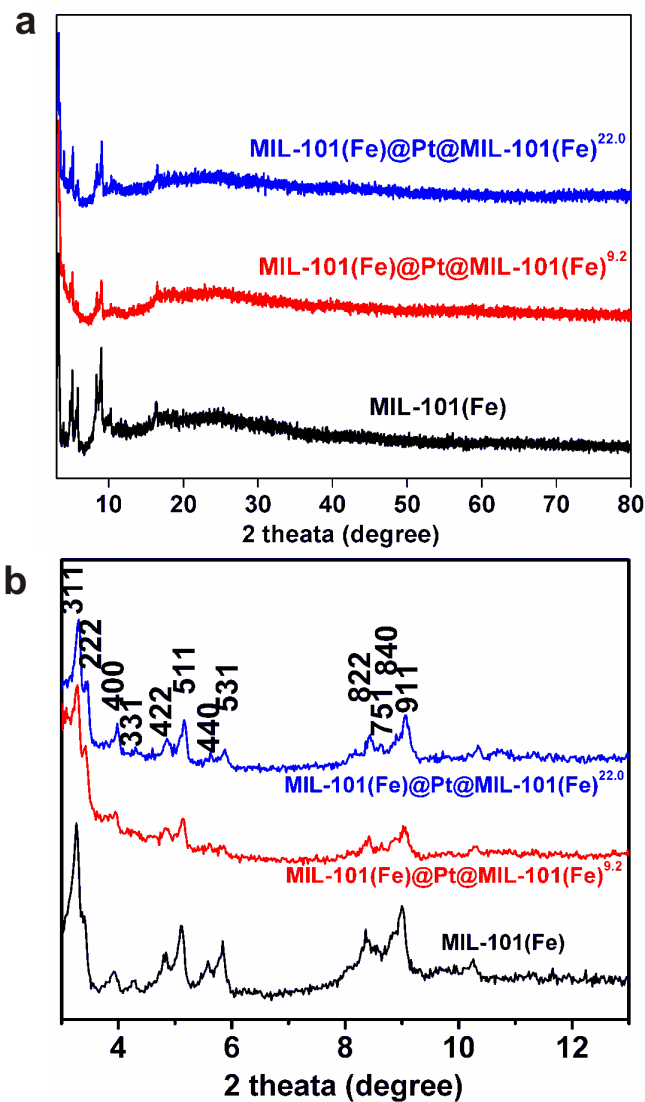

**Supplementary Figure 14 | Crystal structure of MIL-101(Fe)@Pt@MIL-101(Fe).** **a**, Wide angle XRD patterns of pure MIL-101(Fe), MIL-101(Fe)@Pt@MIL-101(Fe)<sup>9.2</sup> and MIL-101(Fe)@Pt@MIL-101(Fe)<sup>22.0</sup>. **b**, Magnified patterns of the low angle zones in **a**.

XRD patterns reveal that only one set of peaks attributing to crystalline MIL-101(Fe) of face centered cubic (fcc) structure are distinguished for all the sandwich nanostructures (Supplementary Fig. 14), and there are no characteristic peaks of Pt appearing in XRD patterns. This result is reasonable considering the fact that Pt NPs have small sizes of about 2.8 nm and a low content (Supplementary Table 1).

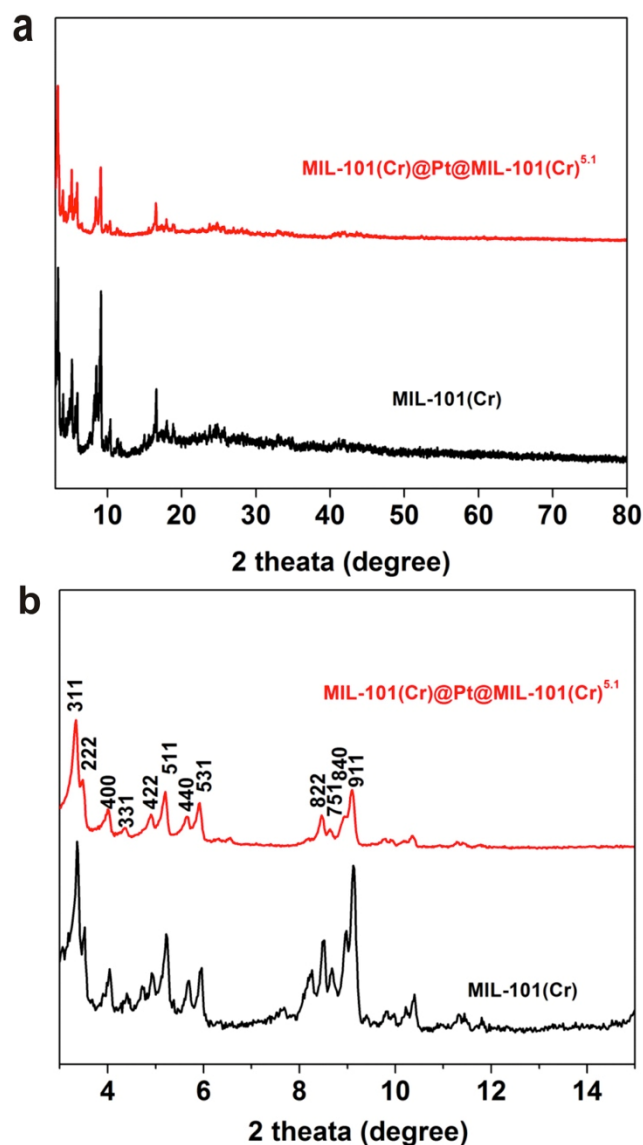

**Supplementary Figure 15 | Crystal structure of MIL-101(Cr)@Pt@MIL-101(Cr)<sup>5.1</sup>.** **a,** Wide angle XRD patterns of pure MIL-101(Cr), and MIL-101(Cr)@Pt@MIL-101(Cr)<sup>5.1</sup>. **b,** Magnified patterns of the low angle zones in **a**.

XRD patterns reveal that only one set of peaks attributing to crystalline MIL-101(Cr) of face centered cubic (fcc) structure are distinguished for all the sandwich nanostructures (Supplementary Fig. 15), and there are no characteristic peaks of Pt appearing in XRD patterns. This result is reasonable considering the fact that Pt NPs have small sizes of about 2.7 nm and a low content (Supplementary Table 1).

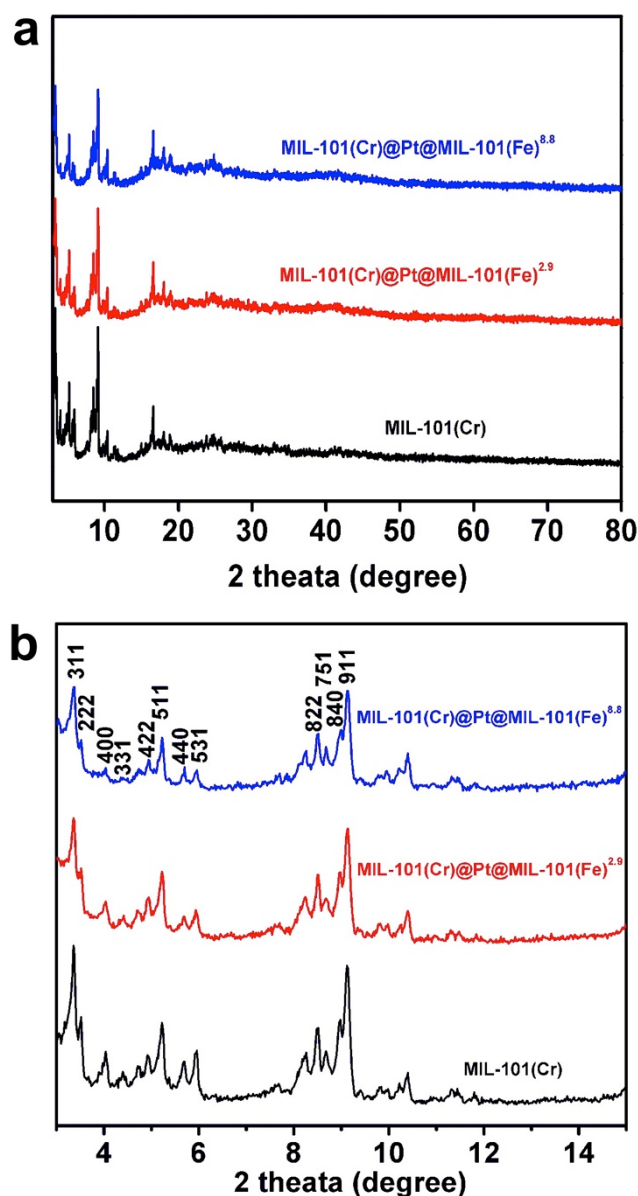

**Supplementary Figure 16 | Crystal structure of MIL-101(Cr)@Pt@MIL-101(Fe).** **a**, Wide angle XRD patterns of pure MIL-101(Cr), MIL-101(Cr)@Pt@MIL-101(Fe)<sup>8.8</sup> and MIL-101(Cr)@Pt@MIL-101(Fe)<sup>2.9</sup>. **b**, Magnified patterns of the low angle zones in **a**.

XRD patterns reveal that only one set of peaks attributing to crystalline MIL-101 of face centered cubic (fcc) structure are distinguished for all the sandwich nanostructures (Supplementary Fig. 16), and there are no characteristic peaks of Pt appearing in XRD patterns. This result is reasonable considering the fact that Pt NPs have small sizes of about 2.8 nm and a low Pt NP content (Supplementary Table 1).

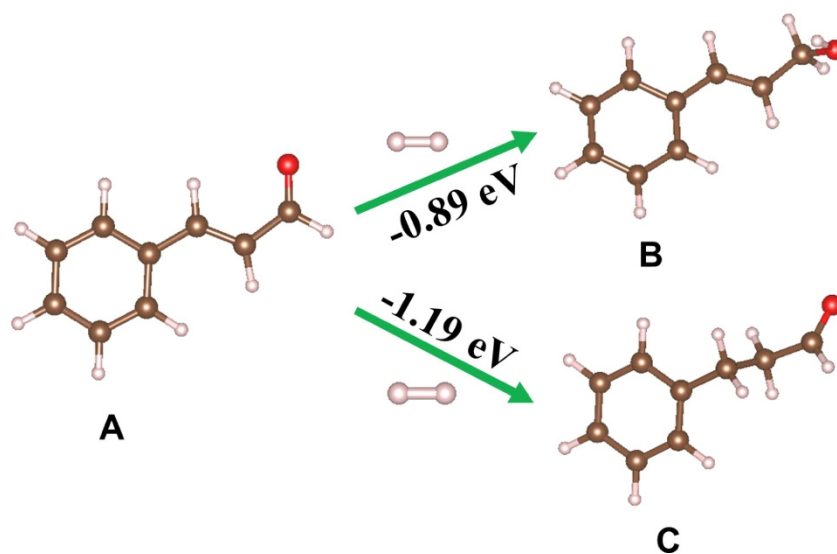

**Supplementary Figure 17 | Theoretical calculation of hydrogenation of A to B and C.**

Color code: carbon- brown, hydrogen- pink, oxygen- red.

Density functional theory (DFT) calculation discloses that it is more favorable for selective hydrogenation of A to C ( $-1.19 \text{ eV}$ ) rather than hydrogenation of A to B ( $-0.89 \text{ eV}$ ). The negative values display that the hydrogenation reactions are exothermic.

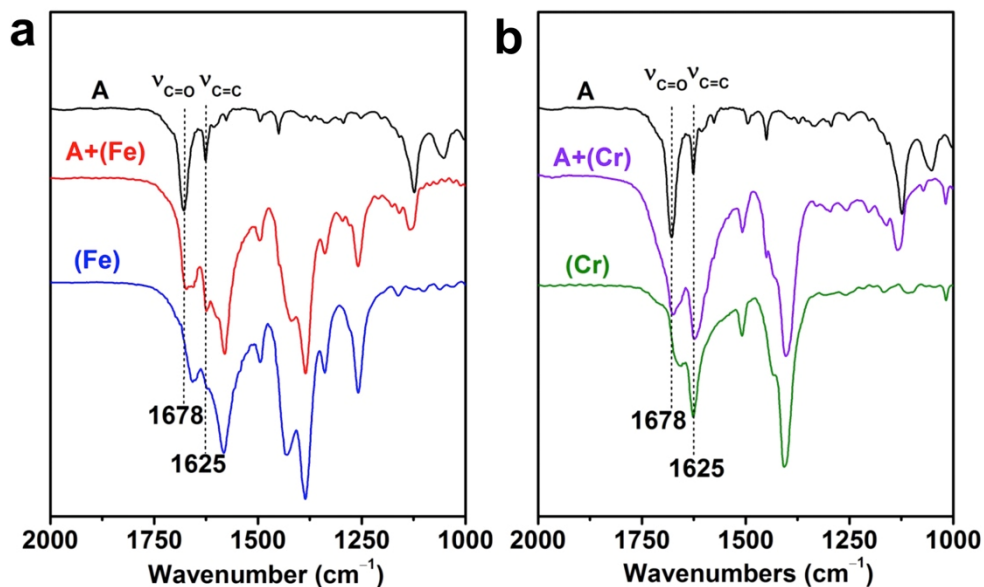

**Supplementary Figure 18 | FTIR spectra of cinnamaldehyde molecules adsorbed on MIL-101.** **a**, Cinnamaldehyde, MIL-101(Fe), and mixture of cinnamaldehyde and MIL-101(Fe) with a mole ratio of 2. **b**, Cinnamaldehyde, MIL-101(Cr), and mixture of cinnamaldehyde and MIL-101(Cr) with a mole ratio of 2. Insets: **A**, (Fe) and (Cr) represent cinnamaldehyde, MIL-101(Fe) and MIL-101(Cr), respectively.

As for cinnamaldehyde (**A**), the bands centered at  $\sim 1625\text{ cm}^{-1}$  and  $\sim 1678\text{ cm}^{-1}$  are assigned to stretching vibration of conjugated C=C bond ( $\nu_{\text{C=C}}$ ) and stretching vibration of C=O band ( $\nu_{\text{C=O}}$ ), respectively. When **A** is mixed with MIL-101(Fe) or MIL-101(Cr) with a mole ratio of 2 based on cinnamaldehyde and  $\text{Fe}^{3+}$  or  $\text{Cr}^{3+}$ , the  $\nu_{\text{C=C}}$  absorption peaks for different samples display almost no changes ( $\sim 1625\text{ cm}^{-1}$ ). On the contrary, the obvious redshift of the  $\nu_{\text{C=O}}$  band from  $\sim 1678\text{ cm}^{-1}$  to smaller wavenumbers is observed ( $\sim 1671\text{ cm}^{-1}$  for MIL-101(Fe)@Pt and  $\sim 1673\text{ cm}^{-1}$  for MIL-101(Cr)@Pt), indicating the specific interaction between coordinatively unsaturated  $\text{Fe}^{3+}/\text{Cr}^{3+}$  ions and the C=O bonds of **A**.

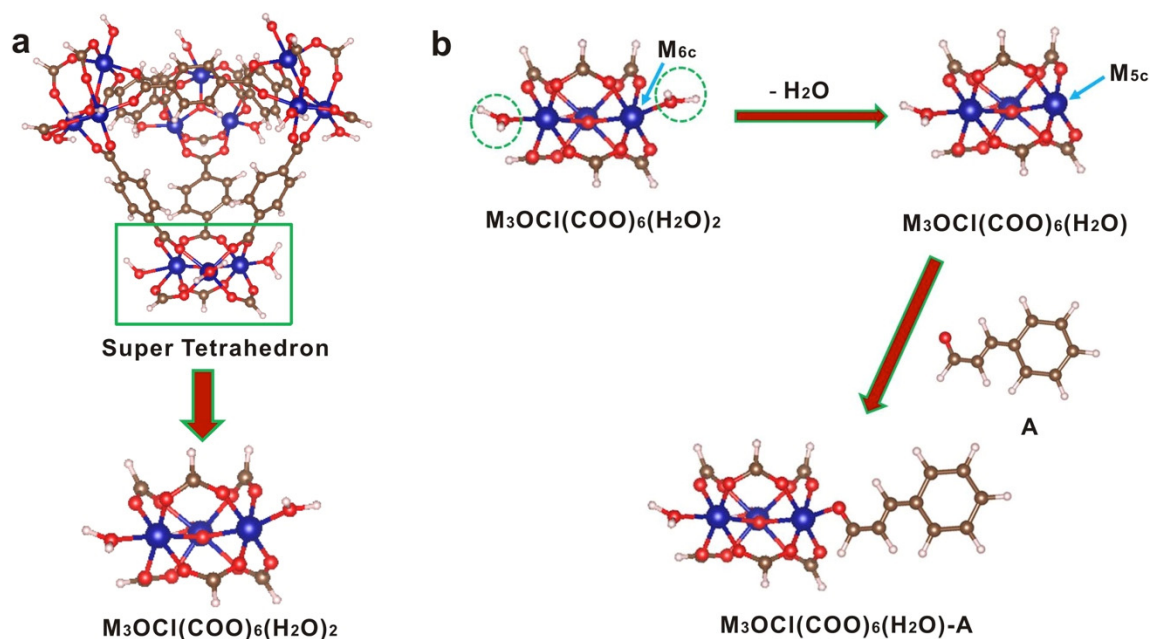

**Supplementary Figure 19 | Theoretical model of the interaction of A with super tetrahedron of MIL-101.** **a**, Structure of the super tetrahedron and trimeric building unit  $M_3OCl(COO)_6(H_2O)_2$ . **b**, Interaction of A with coordinatively unsaturated sites from metal trimers after removing  $H_2O$ .  $M_{6c}$ : sixfold coordinated metal ion;  $M_{5c}$ : fivefold coordinated metal ion; M stands for Cr or Fe. Color code: carbon- brown, hydrogen- pink, oxygen- red, Fe or Cr- blue.

The basic building block of MIL-101 is known as a super tetrahedral cell, which includes four  $Fe_3OCl(COO)_6(H_2O)_2$  or  $Cr_3OCl(COO)_6(H_2O)_2$  trimers connected by the BDC linkers<sup>4</sup>. Therefore, five-coordinated metal nodes in the  $Fe_3OCl(COO)_6H_2O$  or  $Cr_3OCl(COO)_6H_2O$  trimers of super tetrahedral MIL-101 cells would serve as active sites to interact with the C=O group of A.

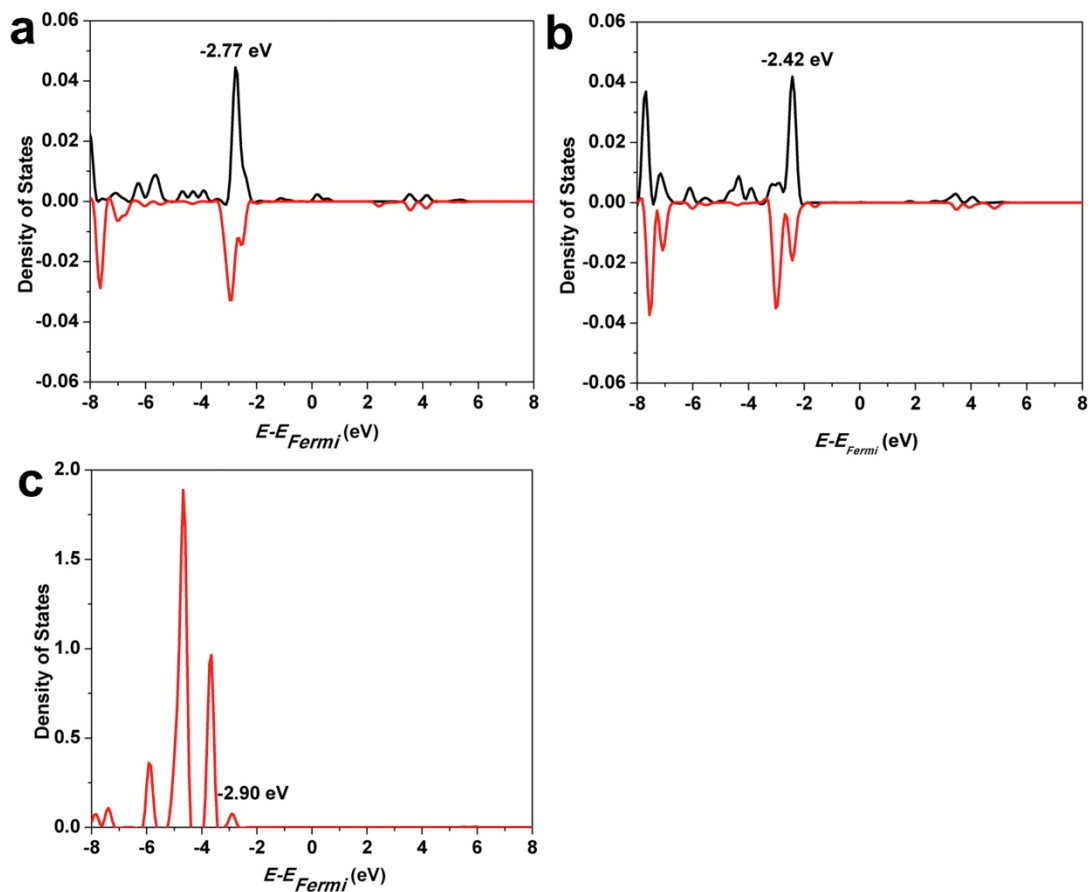

**Supplementary Figure 20 | Partial density of states of different elements. a,** Fe atoms in  $Fe_3OCl(COO)_6H_2O$  trimers. **b,** Cr atoms in  $Cr_3OCl(COO)_6H_2O$  trimers, and **c,** O atoms in the substrate molecule **A**.

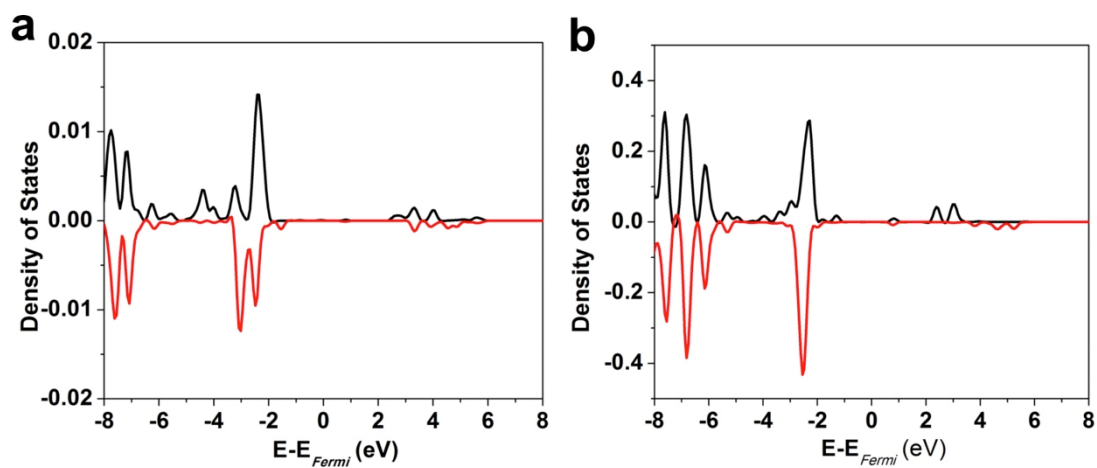

**Supplementary Figure 21 | Partial density of states of different elements. a, Cr atoms and b, O atoms in CHO group in the  $\text{Cr}_3\text{OCl}(\text{COO})_6\text{H}_2\text{O-A}$ .**

The sharp peaks both in Supplementary Fig. 21a and b indicate weak hybridization of Cr  $3d$  and O  $2p$  states.



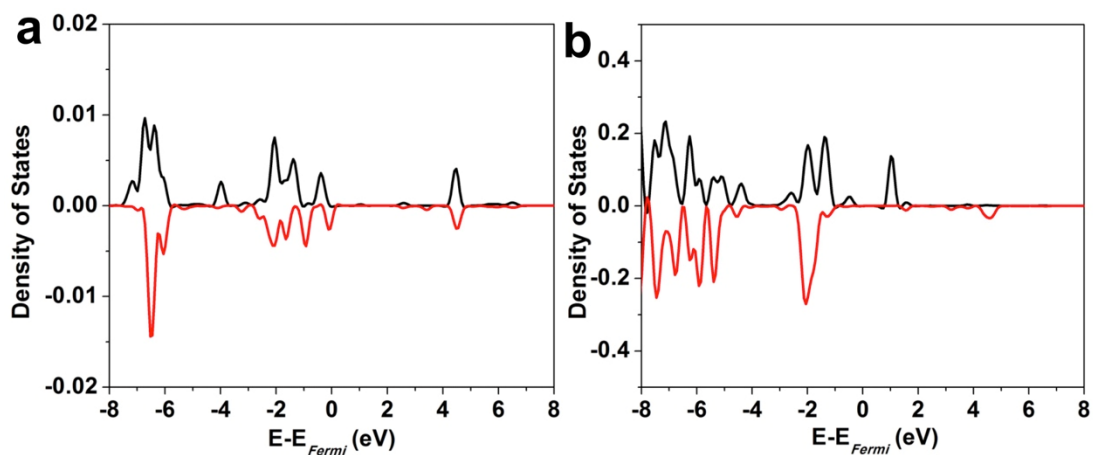

**Supplementary Figure 22 | Partial density of states of different elements. a**, Fe atoms and **b**, O atoms in CHO group in the  $\text{Fe}_3\text{OCl}(\text{COO})_6\text{H}_2\text{O-A}$ .

The weak peaks indicate strong hybridization of Fe  $3d$  and O  $2p$  states. Furthermore, appearance of closer energies of states around  $E_{Fermi}$  for both Fe  $3d$  and O  $2p$  states suggests stronger interaction. So, the analysis on partial density of states supports that there is strong interaction of MIL-101(Fe) with the substrate molecule **A**.

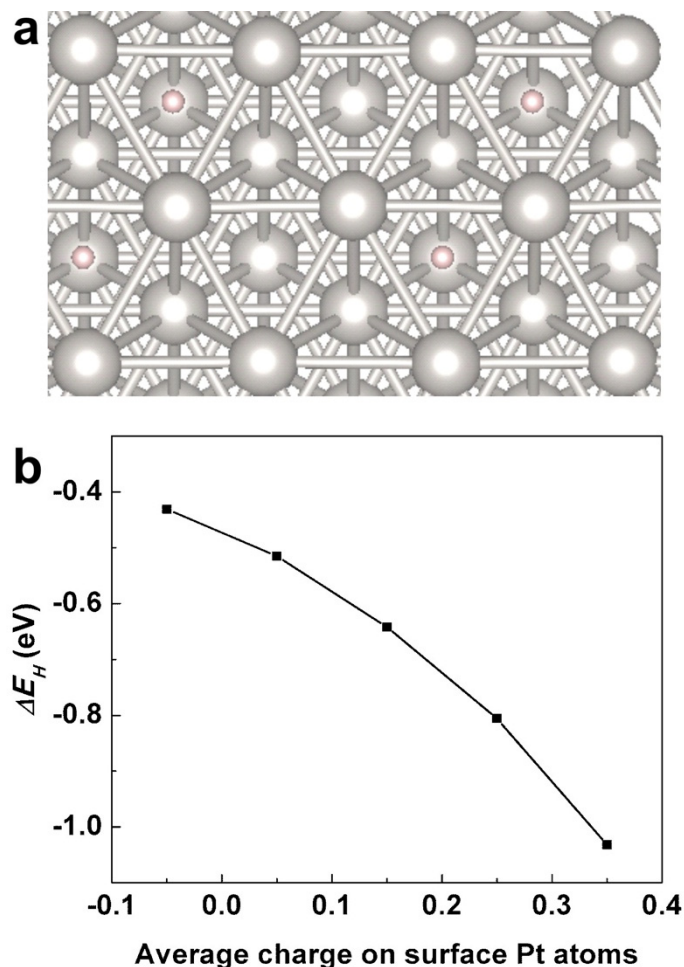

**Supplementary Figure 23 | Theoretical calculation of binding energy of atomic H on Pt.** **a**, Pt (111) (2x2) surface model used for theoretical calculation. **b**, The obtained values for binding energy of atomic H ( $\Delta E_H$ ) on Pt (111) (2x2) surface with negative and positive charges. Color code: grey-Pt, pink- hydrogen.

We have calculated the binding energy of hydrogen atoms ( $\Delta E_H$ ) on Pt (111) (2x2) surface with neutral and positive charges using the DFT method (Supplementary Fig. 23). As for the Pt (111) (2x2) surface with neutral charges, the average surface Pt atoms carry -0.05 charge and the corresponding  $\Delta E_H$  is about -0.42 eV. When the Pt (111) surface charge is increased to positive value, the negative  $\Delta E_H$  is increased almost linearly to the amount of positive charge of surface Pt atoms, indicating strong binding of H atoms. According to the volcano-type relationship between the  $\Delta E_H$  and the catalytic activity<sup>25</sup>, the stronger binding of hydrogen atoms on the positively charged Pt (111) surfaces should be the reason why the catalytic activity of MIL-101(Fe)@Pt is reduced compared with pure Pt NPs.

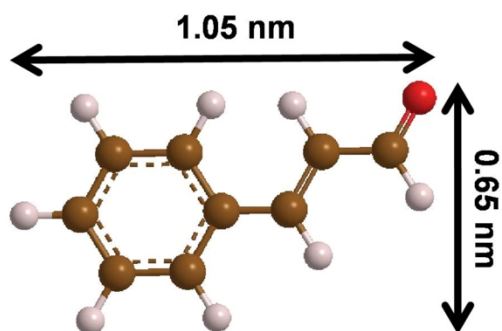

**Supplementary Figure 24 | Molecular structure of cinnamaldehyde (A) (1.05 × 0.65 nm).**

Color code: carbon- brown, hydrogen- pink, oxygen- red.

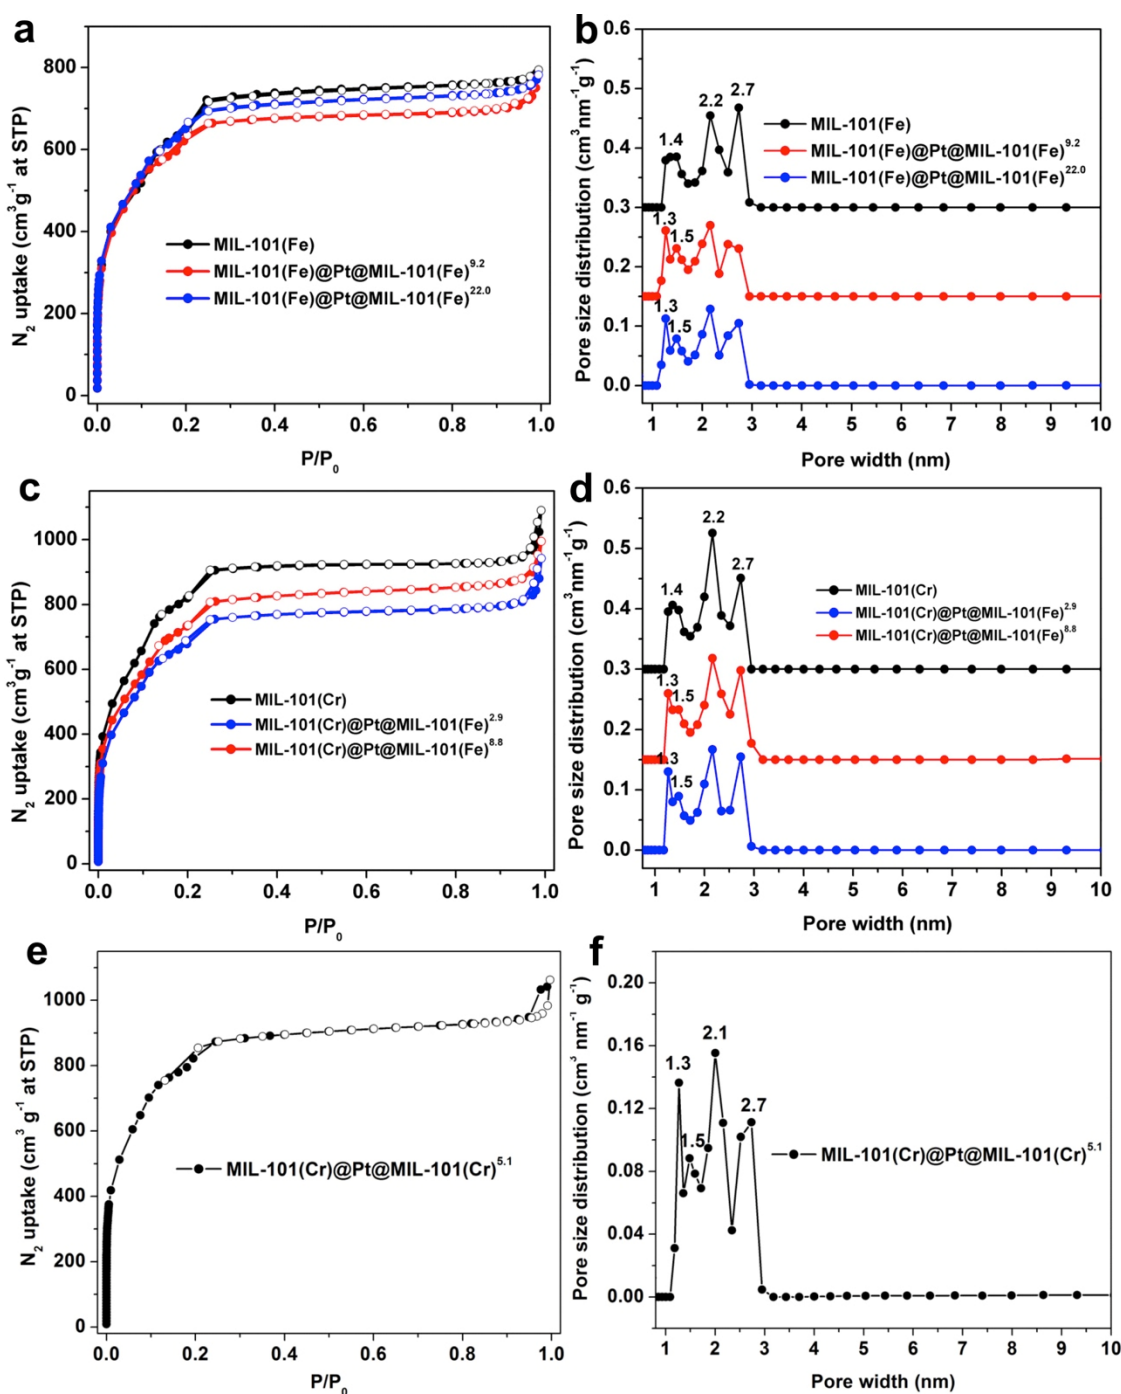

**Supplementary Figure 25 | Surface area and pore structure characterization. a, c, e,  $N_2$  adsorption-desorption isotherms of different samples, and b, d, f, the corresponding pore-size distribution curves.**

All the MIL-101 based nanostructures were purified by a double treatment in ethanol at 60°C for 3 h, and then were dried at 70°C for 3 h in a vacuum oven. The  $N_2$  adsorption isotherms of MIL-101 based materials have the similar adsorption-desorption isotherms and all of them

show a mixture of type I and IV curves (Supplementary Fig. 25). Furthermore, the pore size distribution data indicate that the two mesocages (~2.2 and ~2.7 nm) corresponding to two windows (~1.3 and ~1.5 nm) are presented in the MIL-101 based materials (Supplementary Table 2), in which the substrate molecule **A** ( $1.05 \times 0.65$  nm) can easily diffuse into the pores and freely rotate within the mesocages. Hence, it is difficult to achieve the high selectivity of the target product **B** through the currently-used pore confinement effect<sup>26,27</sup>. Alternatively, in this work the coordinatively unsaturated metal nodes inside MOFs can interact with the C=O group and activate it, giving rise to a high and selective yield of unsaturated alcohol **B** catalyzed by the embedded Pt NPs.

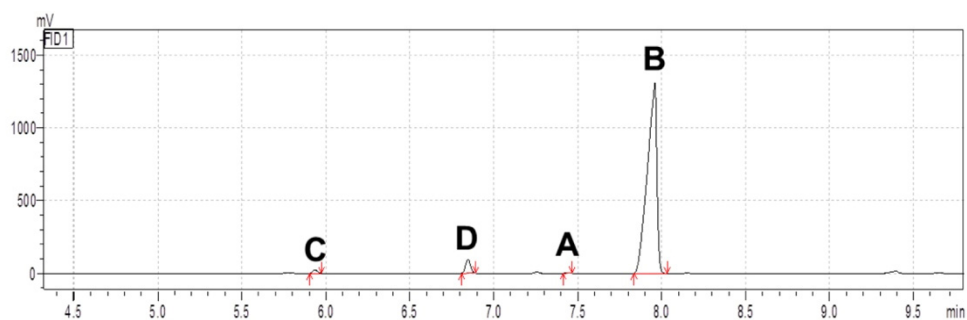

**Supplementary Figure 26 | Raw GC data for selective hydrogenation of cinnamaldehyde (A) by MIL-101(Cr)@Pt@MIL-101(Fe)<sup>2-9</sup>. B stands for cinnamyl alcohol, C represents hydrocinnamaldehyde, and D depicts phenyl propanol.**

| Peaks for | Retention time | Peak area | Height  | Peak area / % |
|-----------|----------------|-----------|---------|---------------|
| <b>C</b>  | 5.936          | 42564     | 22047   | 0.785         |
| <b>D</b>  | 6.846          | 193858    | 94374   | 3.575         |
| <b>A</b>  | 7.440          | 8904      | 4820    | 0.164         |
| <b>B</b>  | 7.959          | 5176698   | 1306176 | 95.475        |
| Total     |                | 5422024   | 1427417 | 100.000       |

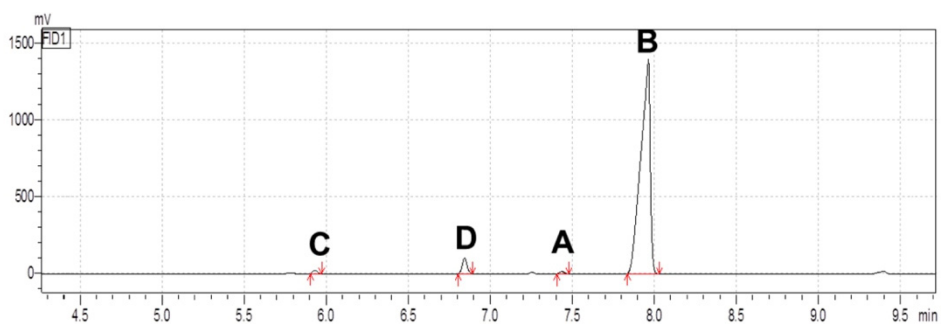

**Supplementary Figure 27 | Raw GC data for selective hydrogenation of cinnamaldehyde (A) by MIL-101(Cr)@Pt@MIL-101(Fe)<sup>2,9</sup> for the second round of catalytic reaction. B stands for cinnamyl alcohol, C represents hydrocinnamaldehyde, and D depicts phenyl propanol.**

| Peaks for | Retention time | Peak area | Height  | Peak area / % |
|-----------|----------------|-----------|---------|---------------|
| <b>C</b>  | 5.931          | 43448     | 22356   | 0.739         |
| <b>D</b>  | 6.844          | 213249    | 102936  | 3.626         |
| <b>A</b>  | 7.436          | 30187     | 14454   | 0.513         |
| <b>B</b>  | 7.963          | 5594749   | 1392540 | 95.122        |
| Total     |                | 5881633   | 1532285 | 100.000       |

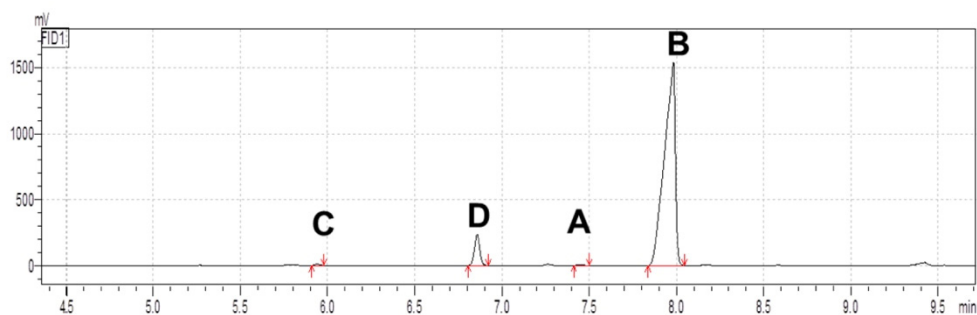

**Supplementary Figure 28 | Raw GC data for selective hydrogenation of cinnamaldehyde (A) by MIL-101(Cr)@Pt@MIL-101(Fe)<sup>2,9</sup> for the third round of catalytic reaction. B stands for cinnamyl alcohol, C represents hydrocinnamaldehyde, and D depicts phenyl propanol.**

| Peaks for | Retention time | Peak area | Height  | Peak area / % |
|-----------|----------------|-----------|---------|---------------|
| <b>C</b>  | 5.939          | 23231     | 11876   | 0.322         |
| <b>D</b>  | 6.857          | 502910    | 235146  | 6.969         |
| <b>A</b>  | 7.447          | 17254     | 7616    | 0.239         |
| <b>B</b>  | 7.981          | 6673302   | 1512922 | 92.470        |
| Total     |                | 7216698   | 1767561 | 100.000       |



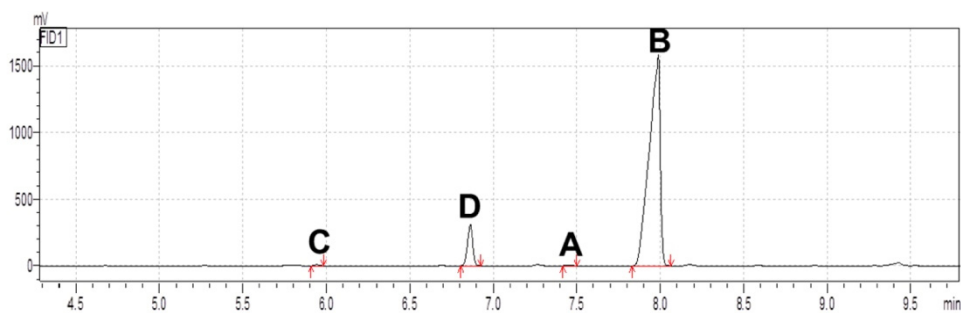

**Supplementary Figure 29 | Raw GC data for selective hydrogenation of cinnamaldehyde (A) by MIL-101(Cr)@Pt@MIL-101(Fe)<sup>2,9</sup> for the fourth round of catalytic reaction. B stands for cinnamyl alcohol, C represents hydrocinnamaldehyde, and D depicts phenyl propanol.**

| Peaks for | Retention time | Peak area | Height  | Peak area / % |
|-----------|----------------|-----------|---------|---------------|
| <b>C</b>  | 5.941          | 17843     | 8851    | 0.225         |
| <b>D</b>  | 6.862          | 682984    | 309213  | 8.628         |
| <b>A</b>  | 7.448          | 14444     | 6545    | 0.182         |
| <b>B</b>  | 7.987          | 7200770   | 1577438 | 90.964        |
| Total     |                | 7916041   | 1902046 | 100.000       |

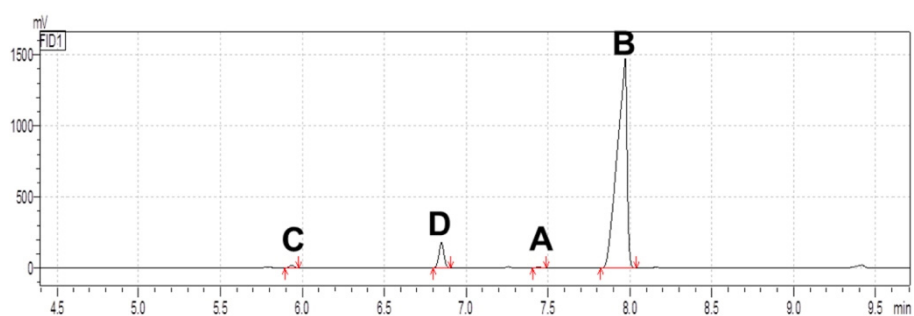

**Supplementary Figure 30 | Raw GC data for selective hydrogenation of cinnamaldehyde (A) by MIL-101(Cr)@Pt@MIL-101(Fe)<sup>2,9</sup> for the fifth round of catalytic reaction. B stands for cinnamyl alcohol, C represents hydrocinnamaldehyde, and D depicts phenyl propanol.**

| Peaks for | Retention time | Peak area | Height  | Peak area/ % |
|-----------|----------------|-----------|---------|--------------|
| <b>C</b>  | 5.935          | 43615     | 21272   | 0.664        |
| <b>D</b>  | 6.850          | 382975    | 177959  | 5.829        |
| <b>A</b>  | 7.440          | 14536     | 6527    | 0.221        |
| <b>B</b>  | 7.971          | 6128531   | 1446408 | 93.285       |
| Total     |                | 6569657   | 1652166 | 100.000      |

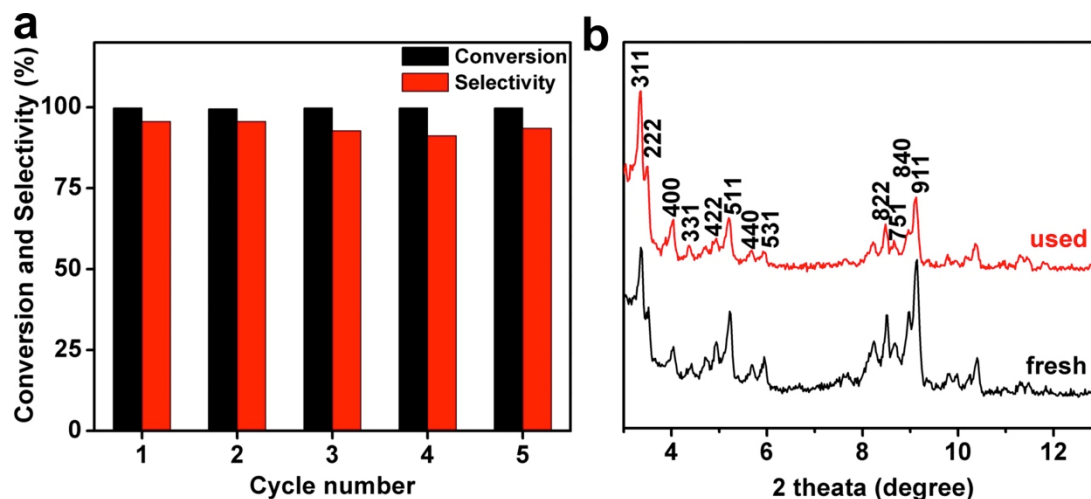

**Supplementary Figure 31 | Stability test and XRD characterization.** **a**, Lifetime of sandwich MIL-101(Cr)@Pt@MIL-101(Fe)<sup>2.9</sup> for catalytic selective hydrogenation of **A** to **B** under the same experimental condition of Table 1. **b**, XRD patterns of MIL-101(Cr)@Pt@MIL-101(Fe)<sup>2.9</sup> before and after the repeated catalytic tests.

It is observed that MIL-101(Cr)@Pt@MIL-101(Fe)<sup>2.9</sup> can still catalyze almost full conversion of **A** to **B** with the slightly changed selectivity around ~95.6% over five successive cycles (Supplementary Figs 26-30 and 31a). The XRD patterns and TEM images of the fresh and used catalysts further reveal that there is no obvious structural and morphological change after repeated catalytic tests (Supplementary Figs 31b and 32). So, the slight changed selectivity of **B** within relative standard deviation of ~2.0% should be originated from the experimental errors. Altogether, one can draw the conclusion that the sandwich MIL-101(Cr)@Pt@MIL-101(Fe)<sup>2.9</sup> catalysts have high stability during the repeated catalytic reactions.

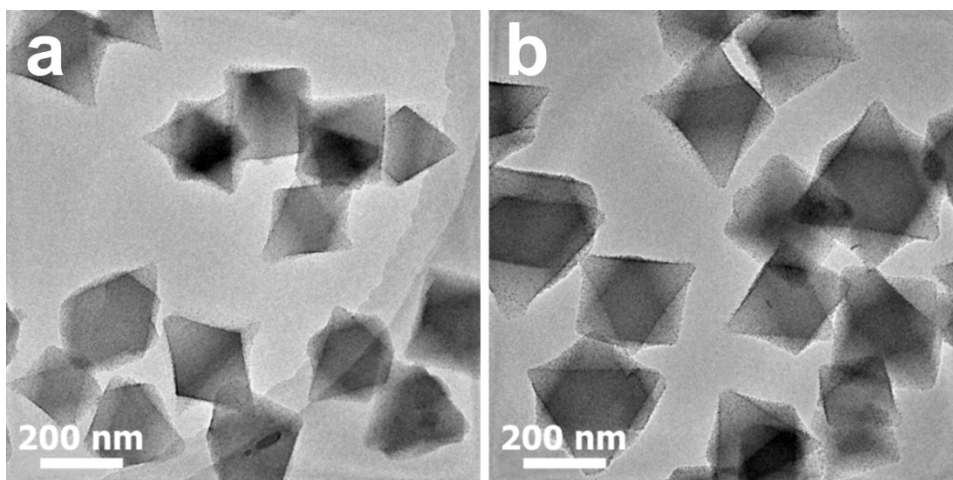

**Supplementary Figure 32 | TEM images of MIL-101(Cr)@Pt@MIL-101(Fe)<sup>2.9</sup>. a, before and b, after the repeated catalytic tests.**

It is noticed that the morphology of MIL-101(Cr)@Pt@MIL-101(Fe)<sup>2.9</sup> is not changed after the successive catalytic tests.

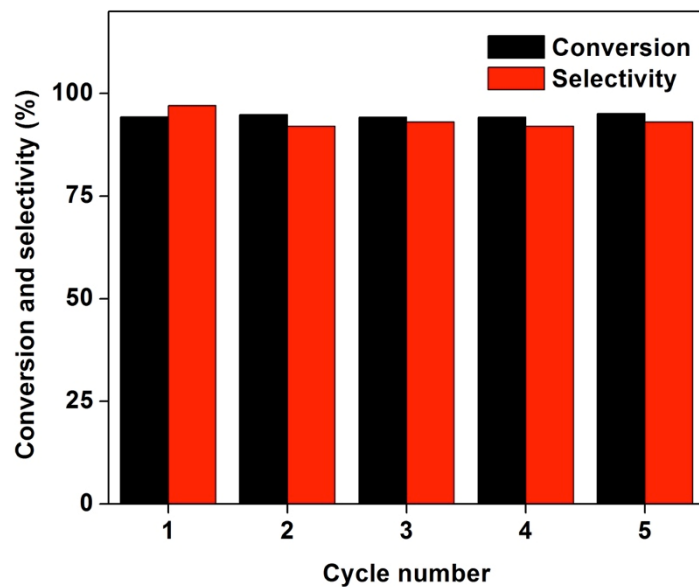

**Supplementary Figure 33 | Stability test of MIL-101(Fe)@Pt@MIL-101(Fe)<sup>9.2</sup>.** Lifetime of sandwich MIL-101(Fe)@Pt@MIL-101(Fe)<sup>9.2</sup> for catalytic selective hydrogenation of **A** to **B** under the same experimental condition of Table 1.

It is observed that MIL-101(Fe)@Pt@MIL-101(Fe)<sup>9.2</sup> can exhibit high stability with ~94.3% conversion of **A** and ~97.0% selectivity of **B** over five successive cycles.

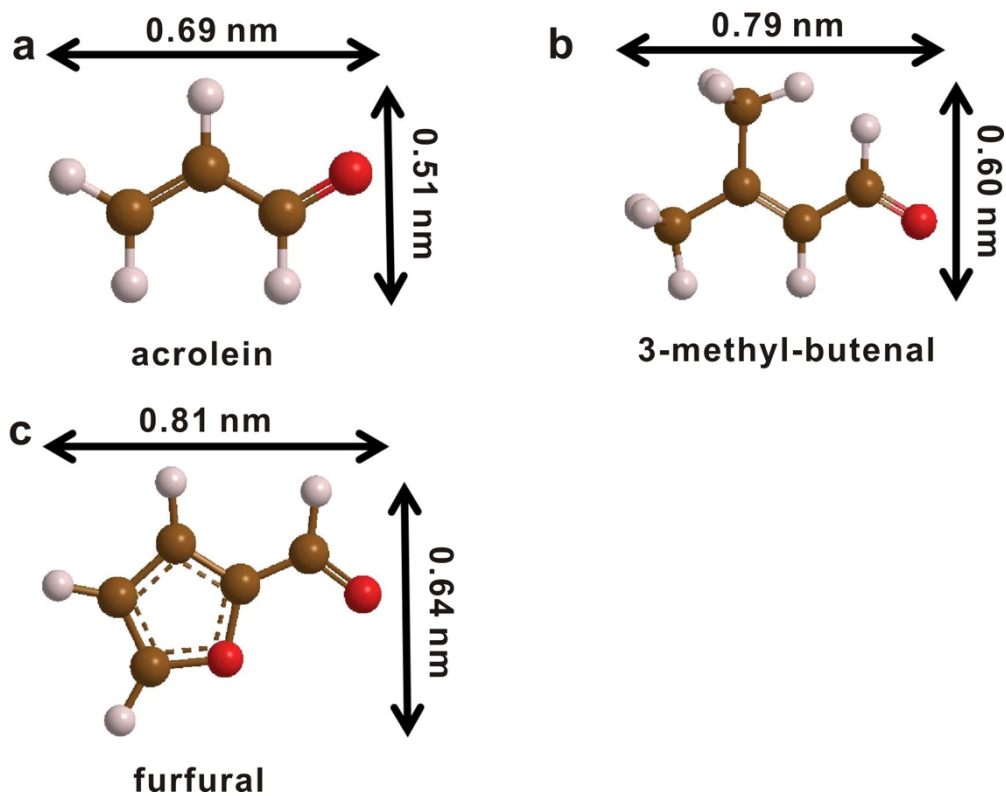

Supplementary Figure 34 | Small-sized  $\alpha$ ,  $\beta$ -unsaturated aldehydes used as substrates for hydrogenation reactions. **a**, Acrolein with no substituents on C=C bond. **b**, Branched 3-methyl-butenal. **c**, Furfural with a furan ring. Color code: carbon- brown, hydrogen- white, oxygen- red.

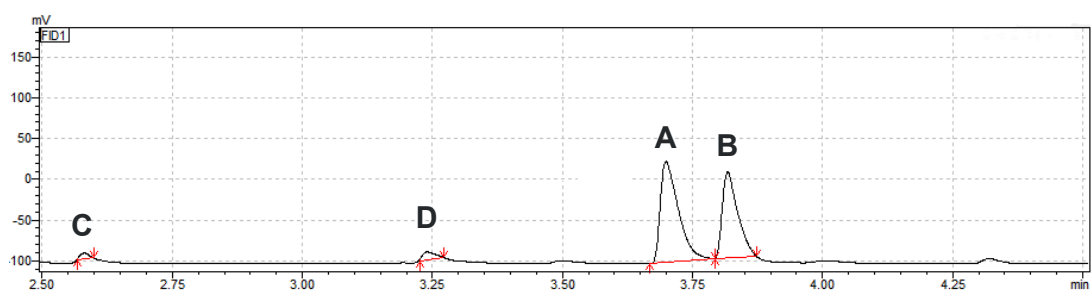

**Supplementary Figure 35 | Raw GC data for selective hydrogenation of 3-methyl-2-butenal (A) by MIL-101(Fe)@Pt@MIL-101(Fe)<sup>22.0</sup>. B stands for 3-methyl-2-butenol, C represents 3-methyl butyraldehyde, and D depicts isoamyl alcohol.**

| Peaks for | Retention time | Peak area | Height | Peak area / % |
|-----------|----------------|-----------|--------|---------------|
| <b>C</b>  | 2.581          | 8990      | 7561   | 1.692         |
| <b>D</b>  | 3.241          | 15001     | 9188   | 2.824         |
| <b>B</b>  | 3.700          | 294053    | 122793 | 55.353        |
| <b>A</b>  | 3.818          | 213192    | 103221 | 40.131        |
| Total     |                | 531236    | 242763 | 100.000       |

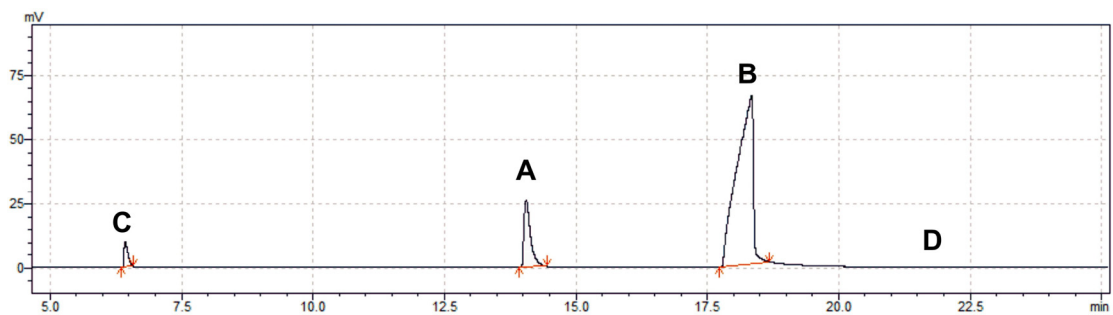

**Supplementary Figure 36 | Raw GC data for selective hydrogenation of furfural (A) by MIL-101(Cr)@Pt@MIL-101(Fe)<sup>8.8</sup>. B stands for furfuryl alcohol, C represents tetrahydrofurfural, and D depicts tetrahydrofurfuryl alcohol.**

| Peaks for | Retention time | Peak area | Height | Peak area / % |
|-----------|----------------|-----------|--------|---------------|
| <b>C</b>  | 6.427          | 51124     | 9819   | 3.04          |
| <b>A</b>  | 14.056         | 202854    | 25516  | 12.08         |
| <b>B</b>  | 18.341         | 1425831   | 65757  | 84.88         |
| <b>D</b>  | 22.008         | 0         | 0      | 0             |
| Total     |                | 1679810   | 101092 | 100           |



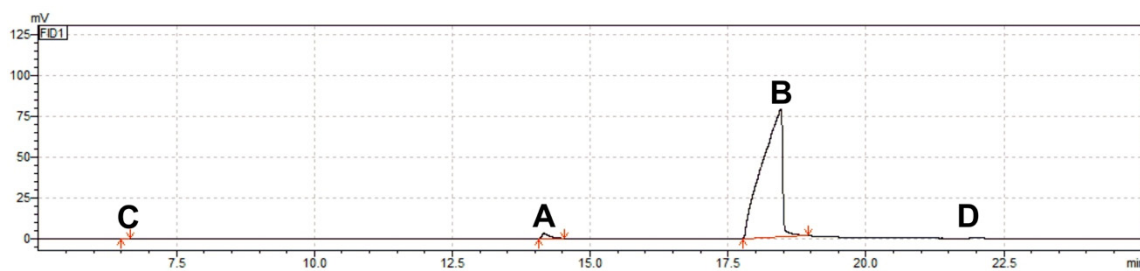

**Supplementary Figure 37 | Raw GC data for selective hydrogenation of furfural (A) by MIL-101(Cr)@Pt@MIL-101(Cr)<sup>5.1</sup>. B stands for furfuryl alcohol, C represents tetrahydrofurfural, and D depicts tetrahydrofurfuryl alcohol.**

| Peaks for | Retention time | Peak area | Height | Peak area / % |
|-----------|----------------|-----------|--------|---------------|
| <b>C</b>  | 6.522          | 1506      | 283    | 0.076         |
| <b>A</b>  | 14.158         | 31165     | 3234   | 1.567         |
| <b>B</b>  | 18.454         | 1956677   | 77258  | 98.358        |
| <b>D</b>  | 22.008         | 0         | 0      | 0             |
| Total     |                | 1989348   | 80776  | 100.00        |

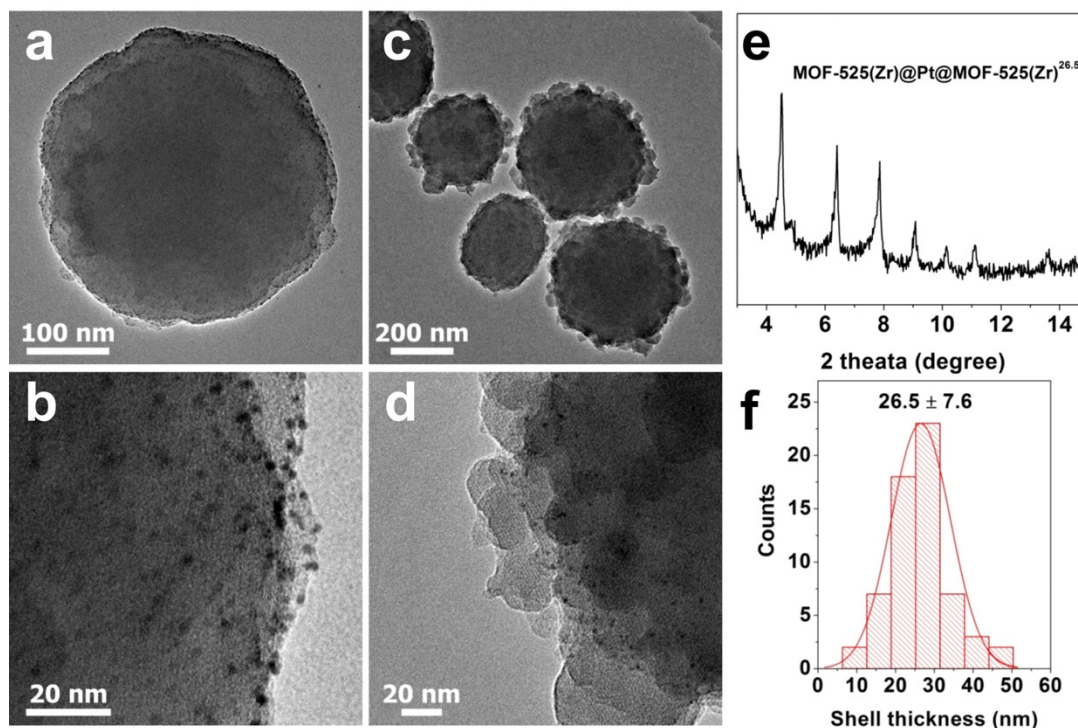

**Supplementary Figure 38 | Morphology of MOF-525(Zr)@Pt and MOF-525(Zr)@Pt@MOF-525(Zr)<sup>26.5</sup>.** **a**, Large-scale and **b**, magnified TEM images of MOF-525(Zr)@Pt. **c**, Large-scale and **d**, magnified TEM images of MOF-525(Zr)@Pt@MOF-525(Zr)<sup>26.5</sup>. **e**, XRD pattern of MOF-525(Zr)@Pt@MOF-525(Zr)<sup>26.5</sup>. **f**, Corresponding shell thickness of MOF-525(Zr)@Pt@MOF-525(Zr)<sup>26.5</sup>.

It is clear that the Pt NPs are homogeneously dispersed on the surface of MOF-525(Zr) without significant aggregation (Supplementary Fig. 38a and b). After coating with MOF-525(Zr), the obtained composites are characteristic of sandwich structures, where Pt NPs are embedded between MOF-525(Zr) cores and MOF-525(Zr) shells (Supplementary Fig. 38c and d). Powder XRD pattern shows that the cubic phase of MOF-525(Zr) in the sandwich structure is observed (Supplementary Fig. 38e)<sup>5</sup>. The average shell thickness is ~26.5 nm, obtained from the statistical results based on TEM images (Supplementary Fig. 38f).

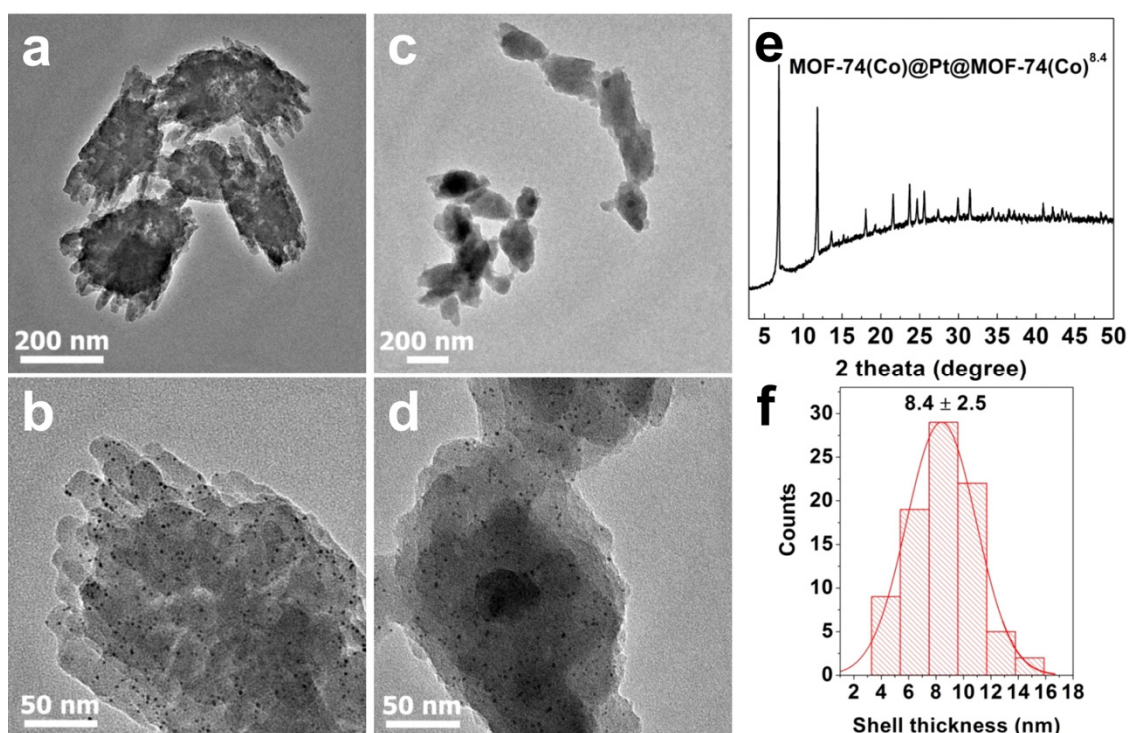

**Supplementary Figure 39 | Morphology of MOF-74(Co)@Pt and MOF-74(Co)@Pt@MOF-74(Co)<sup>8.4</sup>.** **a**, Large-scale and **b**, magnified TEM images of MOF-74(Co)@Pt. **c**, Large-scale and **d**, magnified TEM images of MOF-74(Co)@Pt@MOF-74(Co)<sup>8.4</sup>. **e**, XRD pattern of MOF-74(Co)@Pt@MOF-74(Co)<sup>8.4</sup>. **f**, Corresponding shell thickness of MOF-74(Co)@Pt@MOF-74(Co)<sup>8.4</sup>.

It is clear that the Pt NPs are homogeneously dispersed on the surface of MOF-74(Co) without significant aggregation (Supplementary Fig. 39a and b). After coating with MOF-74(Co), the obtained composites are characteristic of sandwich structures, where Pt NPs are embedded between MOF-74(Co) cores and MOF-74(Co) shells (Supplementary Fig. 39c and d). Powder XRD pattern shows that the high crystallization of MOF-74(Co) in sandwich structure is observed (Supplementary Fig. 39e)<sup>7</sup>. The average shell thickness is ~8.4 nm, obtained from the statistical results based on TEM images (Supplementary Fig. 39f).

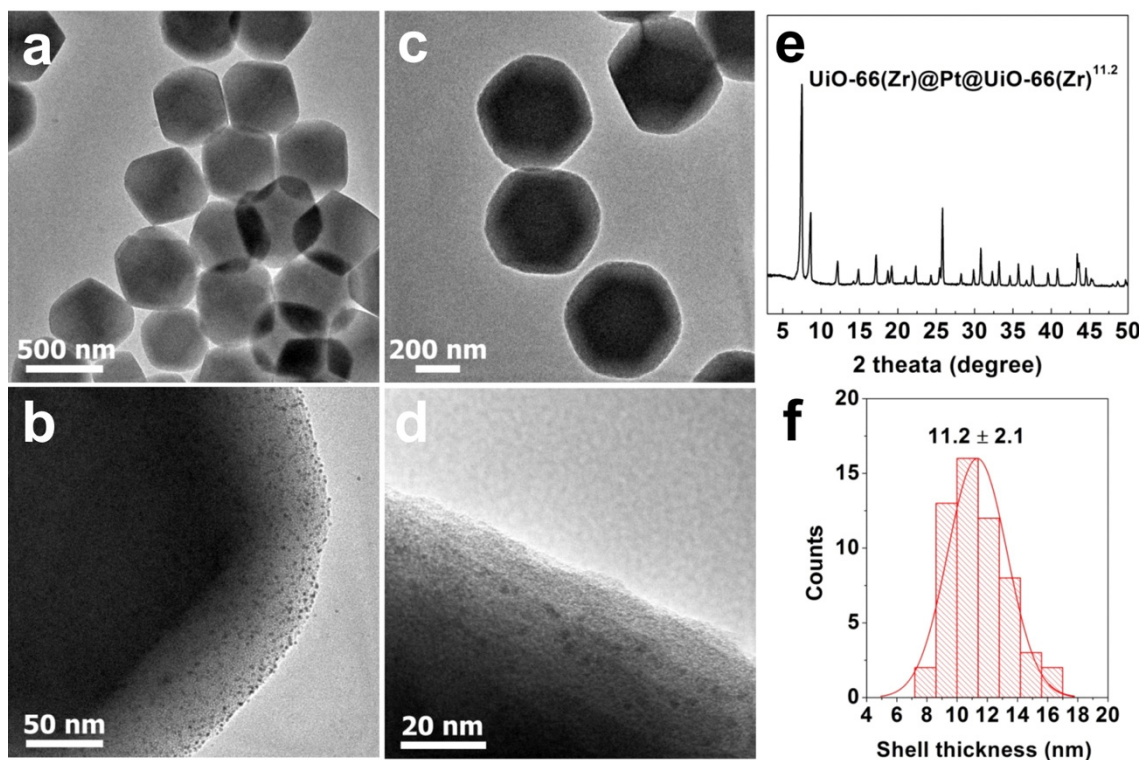

**Supplementary Figure 40 | Morphology of UiO-66(Zr)@Pt and UiO-66(Zr)@Pt@UiO-66(Zr)<sup>11.2</sup>.** **a**, Large-scale and **b**, magnified TEM images of UiO-66(Zr)@Pt. **c**, Large-scale and **d**, magnified TEM images of UiO-66(Zr)@Pt@UiO-66(Zr)<sup>11.2</sup>. **e**, XRD pattern of UiO-66(Zr)@Pt@UiO-66(Zr)<sup>11.2</sup>. **f**, Corresponding shell thickness of UiO-66(Zr)@Pt@UiO-66(Zr)<sup>11.2</sup>.

It is clear that the Pt NPs are homogeneously dispersed on the surface of UiO-66(Zr) without significant aggregation (Supplementary Fig. 40a and b). After coating with UiO-66(Zr), the obtained composites are characteristic of sandwich structures, where Pt NPs are embedded between UiO-66(Zr) cores and UiO-66(Zr) shells (Supplementary Fig. 40c and d). Powder XRD pattern shows that the cubic phase of UiO-66(Zr) in the sandwich structure is observed (Supplementary Fig. 40e)<sup>6</sup>. The average shell thickness is ~11.2 nm, obtained from the statistical results based on TEM images (Supplementary Fig. 40f).

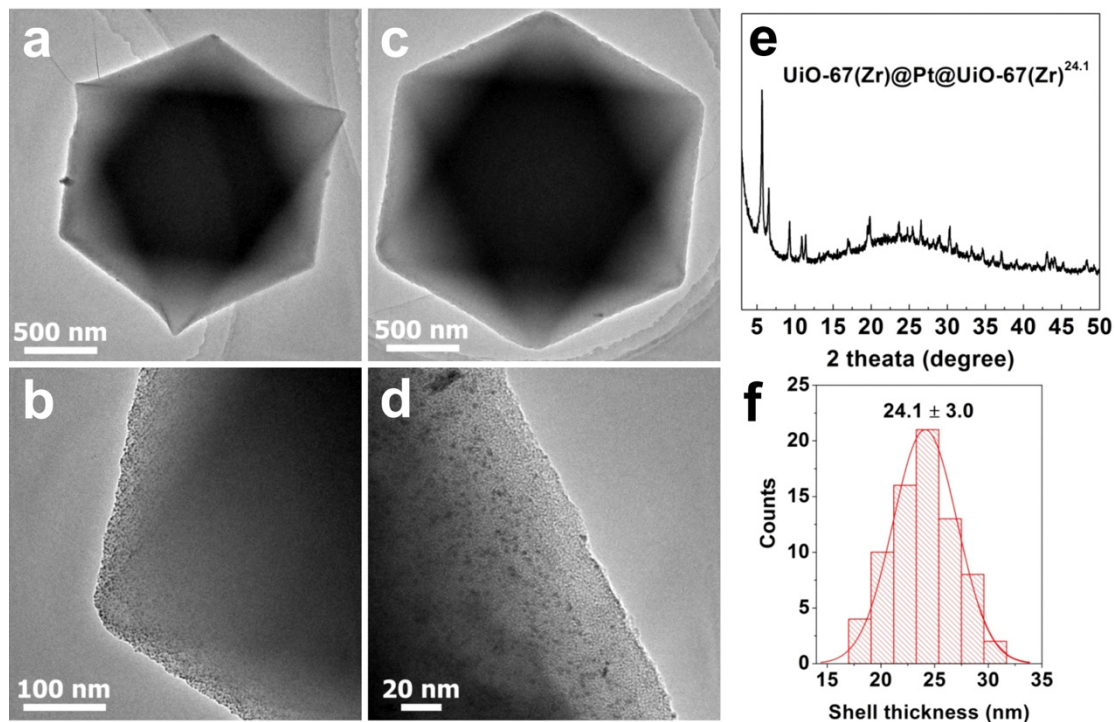

**Supplementary Figure 41 | Morphology of UiO-67(Zr)@Pt and UiO-67(Zr)@Pt@UiO-67(Zr)<sup>24.1</sup>.** **a**, Large-scale and **b**, magnified TEM images of UiO-67(Zr)@Pt. **c**, Large-scale and **d**, magnified TEM images of UiO-67(Zr)@Pt@UiO-67(Zr)<sup>24.1</sup>. **e**, XRD pattern of UiO-67(Zr)@Pt@UiO-67(Zr)<sup>24.1</sup>. **f**, Corresponding shell thickness of UiO-67(Zr)@Pt@UiO-67(Zr)<sup>24.1</sup>.

It is clear that the Pt NPs are homogeneously dispersed on the surface of UiO-67(Zr) without significant aggregation (Supplementary Fig. 41a and b). After coating with UiO-67(Zr), the obtained composites are characteristic of sandwich structures, where Pt NPs are embedded between UiO-67(Zr) cores and UiO-67(Zr) shells (Supplementary Fig. 41c and d). Powder XRD pattern shows that the cubic phase of crystal UiO-67(Zr) in the sandwich structure is observed (Supplementary Fig. 41e)<sup>6</sup>. The average shell thickness is ~24.1 nm, obtained from the statistical results based on TEM images (Supplementary Fig. 41f).

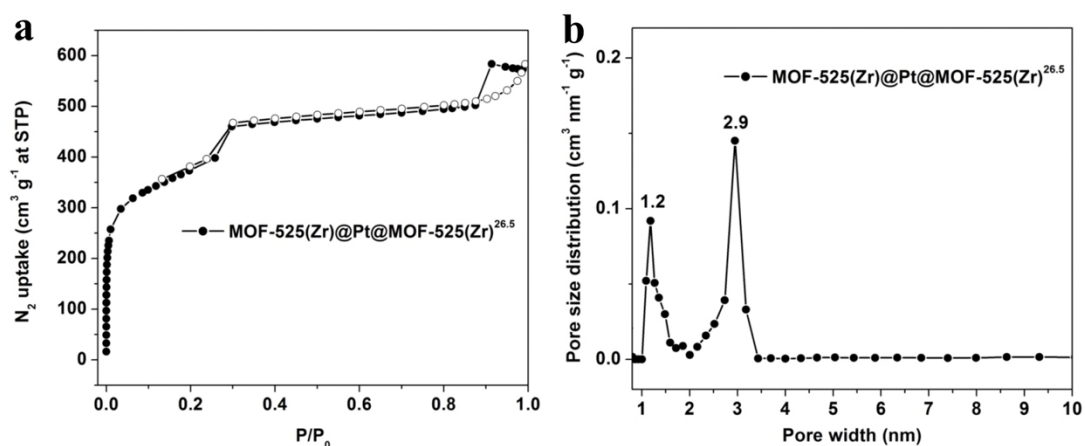

**Supplementary Figure 42 | N<sub>2</sub> adsorption-desorption isotherms and pore structure characterization.** **a**, N<sub>2</sub> adsorption-desorption isotherms of MOF-525(Zr)@Pt@MOF-525(Zr)<sup>26.5</sup>, and **b**, the corresponding pore-size distribution curve.

Before testing, the sandwich MOF-525(Zr)@Pt@MOF-525(Zr)<sup>26.5</sup> nanostructures are immersed into DMF for 24 h, and then washed several times with acetone to remove DMF. Finally, they were dried at 60°C for 24 h in a vacuum oven. The N<sub>2</sub> adsorption-desorption isotherms show a mixture of type I and IV curves (Supplementary Fig. 42a). Furthermore, the pore size distribution data indicate that one mesopore (~2.9 nm) corresponding to a window (~1.2 nm) is presented in the sandwich materials (Supplementary Fig. 42b and Supplementary Table 2).

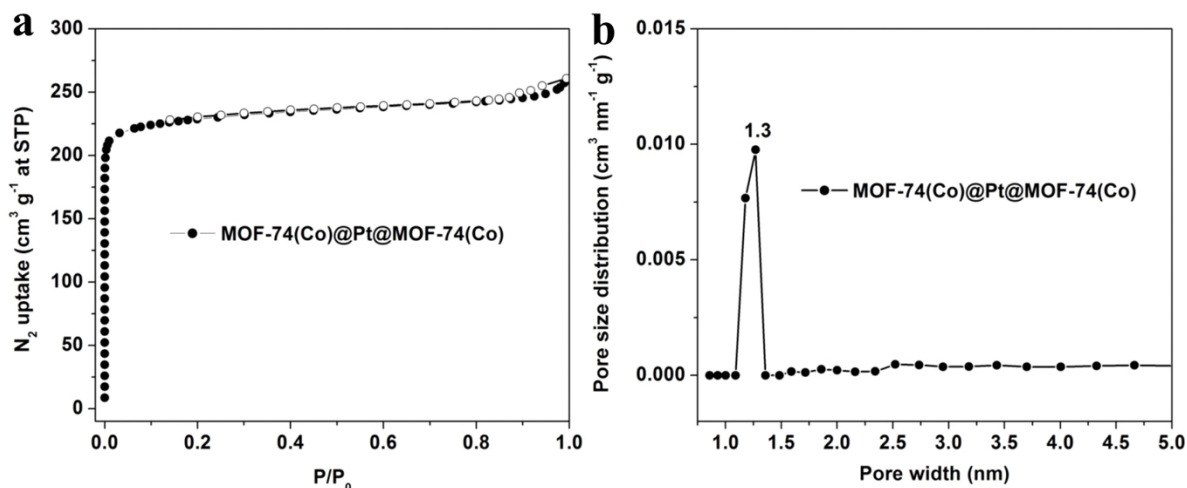

**Supplementary Figure 43 | N<sub>2</sub> adsorption-desorption isotherms and pore structure characterization.** N<sub>2</sub> adsorption-desorption isotherms of MOF-74(Co)@Pt@MOF-74(Co)<sup>8,4</sup>, and **b**, the corresponding pore-size distribution curve.

Before testing, the sandwich MOF-74(Co)@Pt@MOF-74(Co)<sup>8,4</sup> nanostructures are immersed into ethanol at 40°C for 24 h, washed several times with ethanol, and then dried at 60°C for 24 h in a vacuum oven. The step increase in N<sub>2</sub> uptake at low relative pressure in the nitrogen-sorption spectrum (Supplementary Fig. 43a) indicates a microporous structure of MOF-74(Co)@Pt@MOF-74(Co)<sup>8,4</sup>. The average pore size of 1.3 nm is presented in the sandwich structures (Supplementary Fig. 43b and Supplementary Table 2).

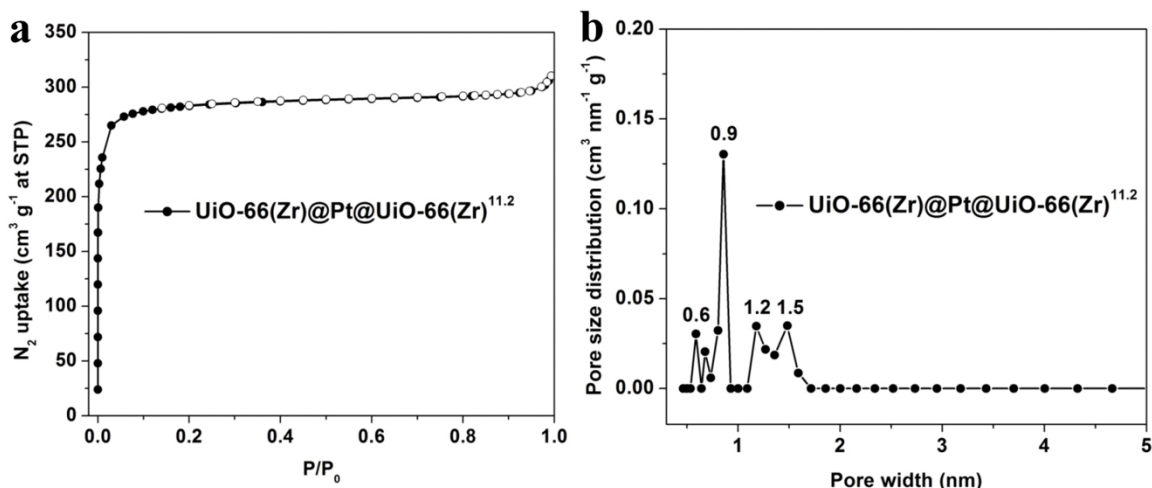

**Supplementary Figure 44 | N<sub>2</sub> adsorption-desorption isotherms and pore structure characterization.** N<sub>2</sub> adsorption-desorption isotherms of UiO-66(Zr)@Pt@UiO-66(Zr)<sup>11.2</sup>, and **b**, the corresponding pore-size distribution curve.

Before testing, the sandwich UiO-66(Zr)@Pt@UiO-66(Zr)<sup>11.2</sup> nanostructures are immersed into methanol for 24 h, washed several times with methanol, and then dried at 60°C for 24 h in a vacuum oven. The steep increase in N<sub>2</sub> uptake at low relative pressure in the nitrogen-sorption spectrum (Supplementary Fig. 44a) indicates a microporous structure of UiO-66(Zr)@Pt@UiO-66(Zr)<sup>11.2</sup>. The average pore sizes of ~0.6, ~0.9, ~1.2 and ~1.5 nm are presented in the sandwich structures (Supplementary Fig. 44b and Supplementary Table 2).



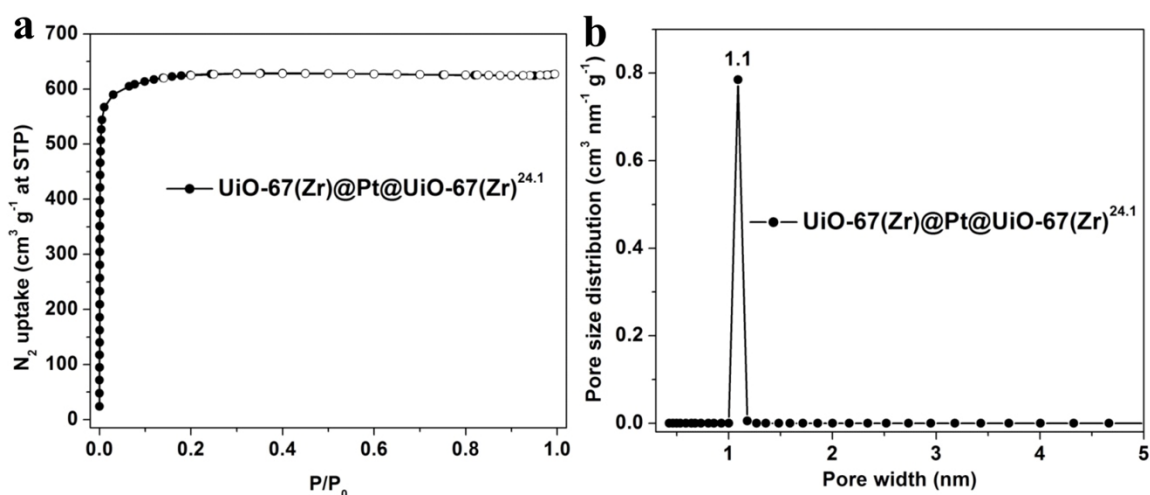

**Supplementary Figure 45 |  $N_2$  adsorption-desorption isotherms and pore structure characterization.**  $N_2$  adsorption-desorption isotherms of UiO-67(Zr)@Pt@UiO-67(Zr)<sup>24.1</sup>, and **b**, the corresponding pore-size distribution curve.

Before testing, the sandwich UiO-66(Zr)@Pt@UiO-67(Zr)<sup>24.1</sup> nanostructures are immersed into methanol for 24 h, washed several times with methanol and then dried at 60°C for 24 h in a vacuum oven. The steep increase in  $N_2$  uptake at low relative pressure in the nitrogen-sorption spectrum (Supplementary Fig. 45a) indicates a microporous structure of UiO-67(Zr)@Pt@UiO-67(Zr)<sup>24.1</sup>. The average pore size of 1.1 nm is presented in the sandwich structures (Supplementary Fig. 45b and Supplementary Table 2).

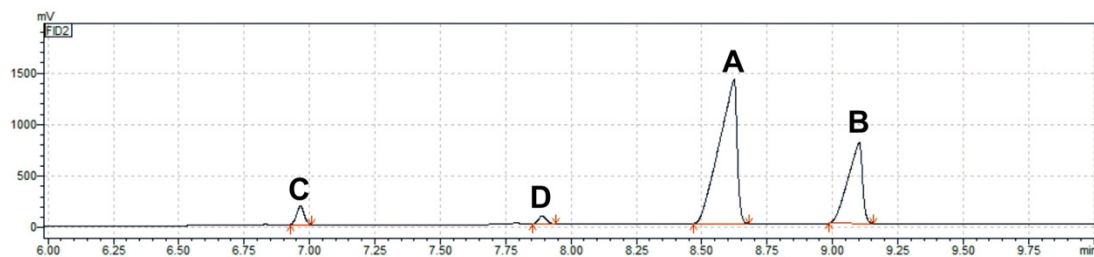

**Supplementary Figure 46 | Raw GC data for selective hydrogenation of cinnamaldehyde (A) by MOF-525(Zr)@Pt@MOF-525(Zr)<sup>26.5</sup>. B stands for cinnamyl alcohol, C represents hydrocinnamaldehyde, and D depicts phenyl propanol.**

| Peaks for | Retention time | Peak area | Height  | Peak area / % |
|-----------|----------------|-----------|---------|---------------|
| <b>C</b>  | 6.966          | 361458    | 178842  | 3.563         |
| <b>D</b>  | 7.890          | 167077    | 77575   | 1.647         |
| <b>A</b>  | 8.622          | 6579208   | 1378924 | 64.853        |
| <b>B</b>  | 9.101          | 3036983   | 781024  | 29.937        |
| Total     |                | 10144726  | 2416366 | 100.00        |

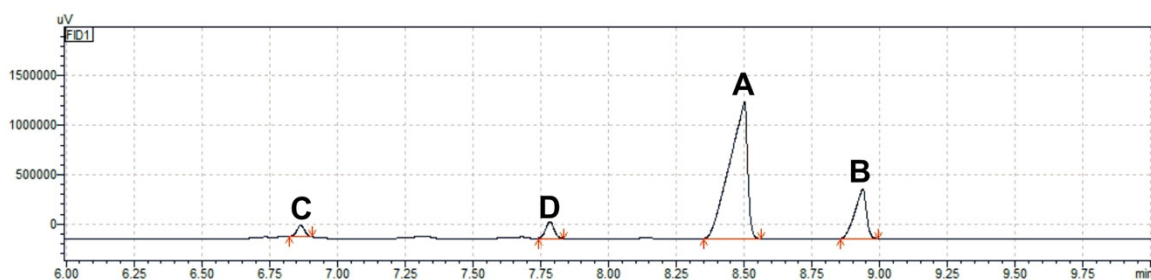

**Supplementary Figure 47 | Raw GC data for selective hydrogenation of cinnamaldehyde (A) by MOF-74(Co)@Pt@MOF-74(Co)<sup>8.4</sup>. B stands for cinnamyl alcohol, C represents hydrocinnamaldehyde, and D depicts phenyl propanol.**

| Peaks for | Retention time | Peak area | Height  | Peak area / % |
|-----------|----------------|-----------|---------|---------------|
| <b>C</b>  | 6.855          | 327524    | 171742  | 4.027         |
| <b>D</b>  | 7.774          | 523662    | 248686  | 6.439         |
| <b>A</b>  | 8.476          | 5285990   | 1251279 | 64.998        |
| <b>B</b>  | 8.932          | 1995415   | 607646  | 24.536        |
| Total     |                | 8132592   | 2279354 | 100.00        |

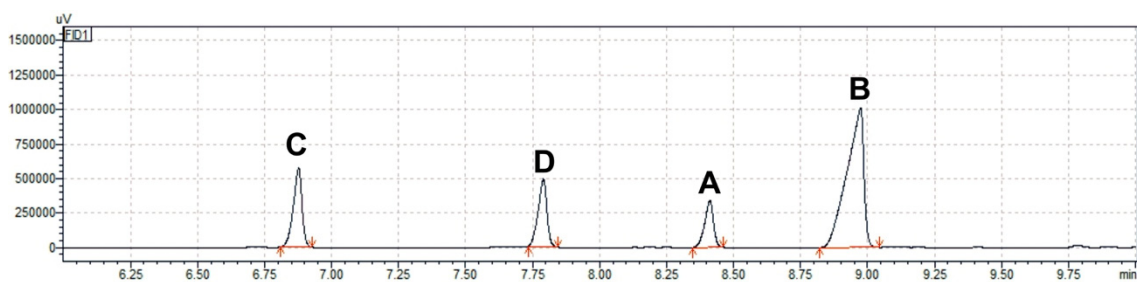

**Supplementary Figure 48 | Raw GC data for selective hydrogenation of cinnamaldehyde (A) by UiO-66(Zr)@Pt@UiO-66(Zr)<sup>11,2</sup>. B stands for cinnamyl alcohol, C represents hydrocinnamaldehyde, and D depicts phenyl propanol.**

| Peaks for | Retention time | Peak area | Height  | Peak area / % |
|-----------|----------------|-----------|---------|---------------|
| <b>C</b>  | 6.877          | 1278716   | 570131  | 16.733        |
| <b>D</b>  | 7.791          | 1127904   | 487931  | 14.760        |
| <b>A</b>  | 8.412          | 770228    | 337385  | 10.079        |
| <b>B</b>  | 8.974          | 4464853   | 1003755 | 58.427        |
| Total     |                | 7641700   | 2399203 | 100.00        |

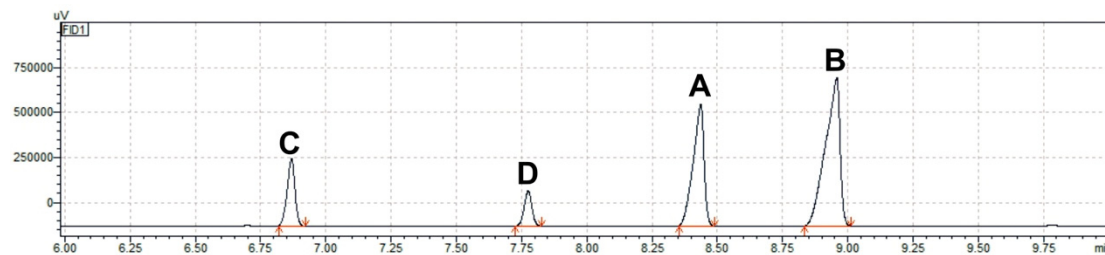

**Supplementary Figure 49 | Raw GC data for selective hydrogenation of cinnamaldehyde (A) by UiO-67(Zr)@Pt@UiO-67(Zr)<sup>24.1</sup>. B stands for cinnamyl alcohol, C represents hydrocinnamaldehyde, and D depicts phenyl propanol.**

| Peaks for | Retention time | Peak area | Height  | Peak area / % |
|-----------|----------------|-----------|---------|---------------|
| <b>C</b>  | 6.868          | 793501    | 376336  | 12.421        |
| <b>D</b>  | 7.775          | 402963    | 192214  | 6.308         |
| <b>A</b>  | 8.436          | 1954738   | 673447  | 30.599        |
| <b>B</b>  | 8.957          | 3237116   | 824554  | 50.672        |
| Total     |                | 6388318   | 2066552 | 100.00        |

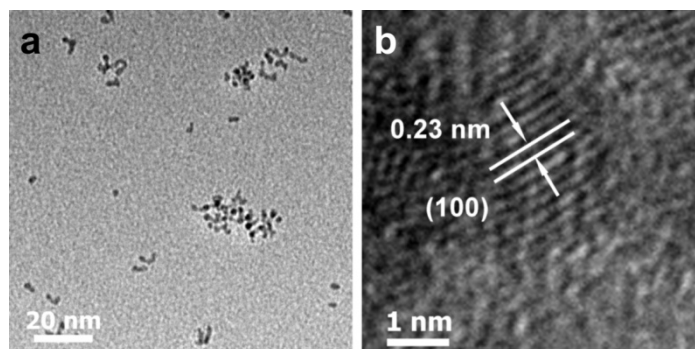

**Supplementary Figure 50 | Morphology of Ru NPs.** **a**, TEM image of as-synthesized Ru NPs. **b**, HRTEM image of a single Ru NP.

Ru NP is highly crystalline with the interplanar spacing of 0.23 nm, corresponding to the (100) plane of Ru.

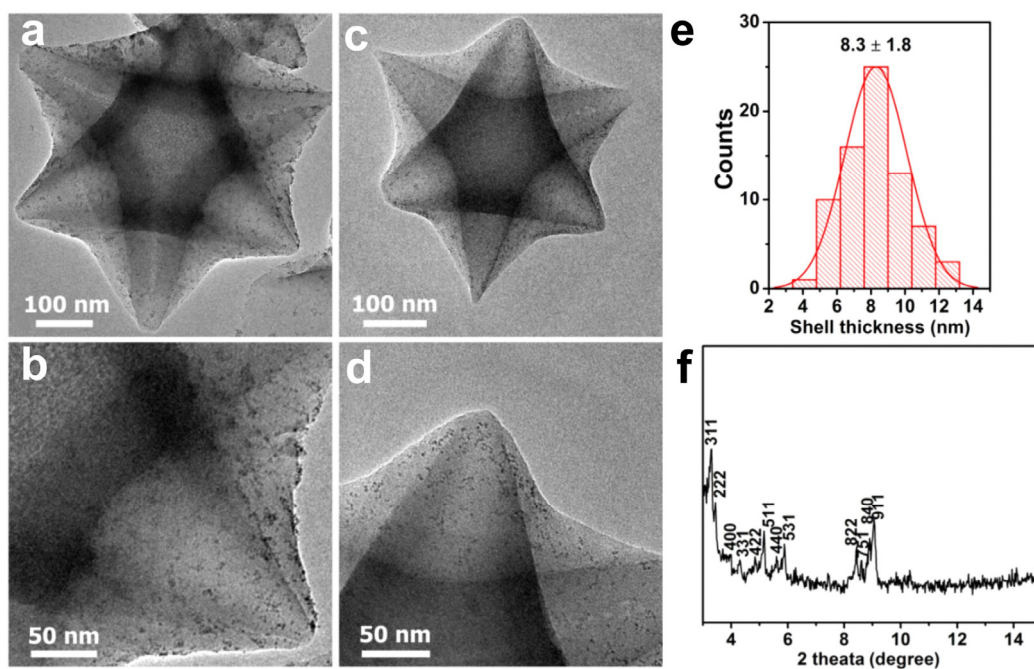

**Supplementary Figure 51 | Morphology of MIL-101(Fe)@Ru and MIL-101(Fe)@Ru@MIL-101(Fe)<sup>8.3</sup>.** a, b, TEM image of MIL-101(Fe)@Ru. c, d, TEM images of single MIL-101(Fe)@Ru@MIL-101(Fe)<sup>8.3</sup>. e, Corresponding shell thickness of MIL-101(Fe)@Ru@MIL-101(Fe)<sup>8.3</sup>. f, XRD pattern of MIL-101(Fe)@Ru@MIL-101(Fe)<sup>8.3</sup>.

It is clear that Ru NPs are homogeneously dispersed on the surface of MIL-101(Fe) without significant aggregation (Supplementary Fig. 51a and b). After coating with MIL-101(Fe), the obtained composites are characteristic of sandwich structures, where Ru NPs are embedded between MIL-101(Fe) cores and MIL-101(Fe) shells (Supplementary Fig. 51c and d). Powder XRD pattern shows that the high crystallization of MIL-101(Fe) in sandwich structure is observed (Supplementary Fig. 51f). The average shell thickness is ~8.3 nm, obtained from the statistical results based on TEM images (Supplementary Fig. 51e).

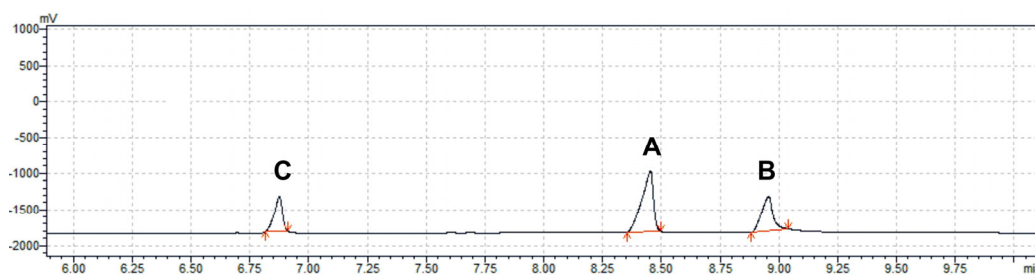

**Supplementary Figure 52 | Raw GC data for selective hydrogenation of cinnamaldehyde (A) by MIL-101(Fe)@Ru@MIL-101(Fe)<sup>8.3</sup>. B stands for cinnamyl alcohol, C represents hydrocinnamaldehyde, and D depicts phenyl propanol.**

| Peaks for | Retention time | Peak area | Height  | Peak area / % |
|-----------|----------------|-----------|---------|---------------|
| <b>C</b>  | 6.868          | 1145885   | 479473  | 20.2          |
| <b>D</b>  | 7.775          | 0         | 0       | 0             |
| <b>A</b>  | 8.453          | 2908105   | 836132  | 51.3          |
| <b>B</b>  | 8.956          | 1618587   | 482077  | 28.5          |
| Total     |                | 5672577   | 1797682 | 100           |



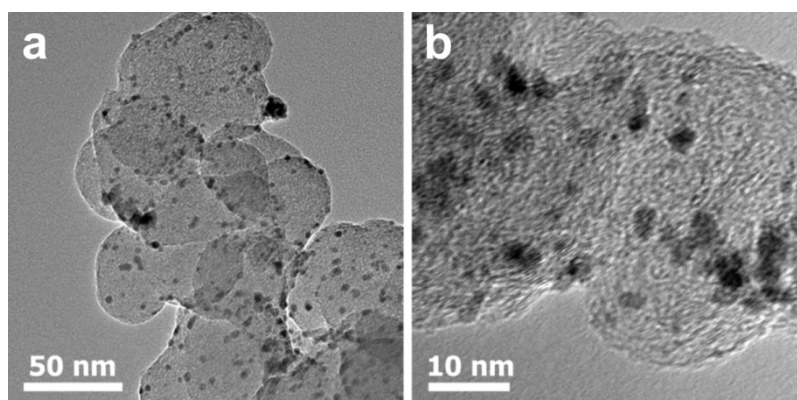

**Supplementary Figure 53 | Morphology of commercial Pt/C. a, b, TEM images of Pt/C catalysts.**

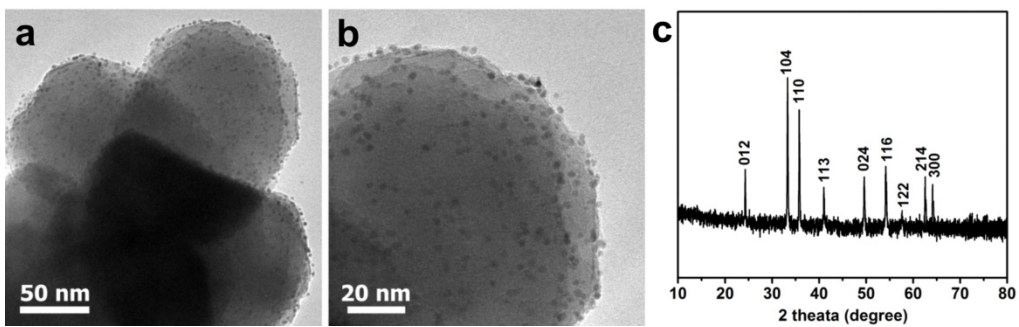

**Supplementary Figure 54 | Characterization of Pt/Fe<sub>2</sub>O<sub>3</sub>.** **a, b**, TEM images of Pt/Fe<sub>2</sub>O<sub>3</sub> catalysts, and **c**, corresponding XRD pattern.

.

**Supplementary Table 1 | Pt loading amount in different samples determined by ICP-MS, and the amount of each catalysts used in cinnamaldehyde hydrogenation reaction.**

| Samples                                    | Pt<br>(wt.%) | Amount of catalysts<br>(mg) | Amount of Pt<br>(mg) |
|--------------------------------------------|--------------|-----------------------------|----------------------|
| MIL-101(Fe)@Pt                             | 5.1          | 4.5                         | 0.23                 |
| MIL-101(Cr)@Pt                             | 4.8          | 4.8                         | 0.23                 |
| MIL-101(Fe)@Pt@MIL-101(Fe) <sup>9.2</sup>  | 4.7          | 4.9                         | 0.23                 |
| MIL-101(Fe)@Pt@MIL-101(Fe) <sup>22.0</sup> | 4.2          | 5.5                         | 0.23                 |
| MIL-101(Cr)@Pt@MIL-101(Cr) <sup>5.1</sup>  | 4.4          | 5.2                         | 0.23                 |
| MIL-101(Cr)@Pt@MIL-101(Fe) <sup>2.9</sup>  | 4.6          | 5.0                         | 0.23                 |
| MIL-101(Cr)@Pt@MIL-101(Fe) <sup>8.8</sup>  | 3.6          | 6.3                         | 0.23                 |
| MOF-525(Zr)@Pt@MOF-525(Zr) <sup>26.5</sup> | 6.7          | 3.4                         | 0.23                 |
| MOF-74(Co)@Pt@MOF-74(Co) <sup>8.4</sup>    | 2.4          | 9.5                         | 0.23                 |
| UiO-66(Zr)@Pt@UiO-66(Zr) <sup>11.2</sup>   | 2.9          | 7.8                         | 0.23                 |
| UiO-67(Zr)@Pt@UiO-67(Zr) <sup>24.1</sup>   | 3.0          | 7.6                         | 0.23                 |

Note that all the Pt NPs presented in all catalysts are ~2.8 nm in diameter, and furthermore, each catalyst used contains the same amount of Pt NPs (0.23 mg). Such similar size and content of Pt NPs in different samples make the catalytic performance evaluation more comparable.

**Supplementary Table 2 | Physicochemical properties of MIL-101(Cr), MIL-101(Fe) and MIL-101@Pt@MIL-101<sup>a</sup>.**

| Catalysts                                  | BET surface area<br>(m <sup>2</sup> g <sup>-1</sup> ) | Average<br>porediameter<br>(nm) | Pore volume<br>(cm <sup>3</sup> g <sup>-1</sup> ) |
|--------------------------------------------|-------------------------------------------------------|---------------------------------|---------------------------------------------------|
| MIL-101(Fe)                                | 2481                                                  | 1.3~1.5, 2.2, 2.7               | 1.22                                              |
| MIL-101(Fe)@Pt@MIL-101(Fe) <sup>9,2</sup>  | 2118                                                  | 1.3, 1.5, 2.2, 2.7              | 1.05                                              |
| MIL-101(Fe)@Pt@MIL-101(Fe) <sup>22,0</sup> | 2414                                                  | 1.3, 1.5, 2.2, 2.7              | 1.19                                              |
| MIL-101(Cr)                                | 2942                                                  | 1.3~1.5, 2.2, 2.7               | 1.58                                              |
| MIL-101(Cr)@Pt@MIL-101(Cr) <sup>5,1</sup>  | 2650                                                  | 1.3, 1.5, 2.1, 2.7              | 1.43                                              |
| MIL-101(Cr)@Pt@MIL-101(Fe) <sup>2,9</sup>  | 2466                                                  | 1.3, 1.5, 2.2, 2.7              | 1.36                                              |
| MIL-101(Cr)@Pt@MIL-101(Fe) <sup>8,8</sup>  | 2647                                                  | 1.3, 1.5, 2.2, 2.7              | 1.46                                              |
| MOF-525(Zr)@Pt@MOF-525(Zr) <sup>26,5</sup> | 1364                                                  | 1.2, 2.9                        | 1.08                                              |
| MOF-74(Co)@Pt@MOF-74(Co) <sup>8,4</sup>    | 859                                                   | 1.3                             | 0.40                                              |
| UiO-66(Zr)@Pt@UiO-66(Zr) <sup>11,2</sup>   | 1126                                                  | 0.6, 0.9, 1.2, 1.5              | 0.47                                              |
| UiO-67(Zr)@Pt@UiO-67(Zr) <sup>24,1</sup>   | 2604                                                  | 1.1                             | 0.97                                              |

<sup>a</sup> Specific surface areas and pore size distributions of the different samples were calculated by using the Brunauer-Emmett-Teller (BET) equation and the nonlocal density functional theory (NLDFT) model<sup>28</sup>, respectively.

**Supplementary Table 3 | Selective hydrogenation of cinnamaldehyde (A) by different catalysts<sup>a</sup>.**

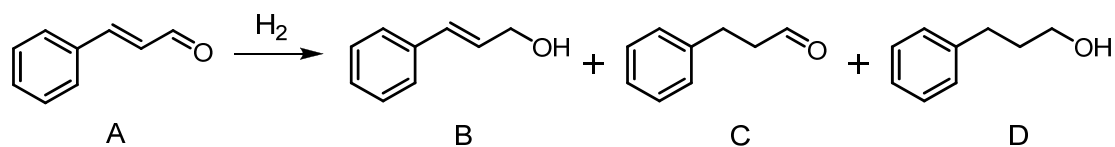

| Entry | Catalysts                                  | Time<br>(h) | Conversion<br>(%) <sup>b</sup> | Selectivity (%) <sup>b</sup> |          |          |
|-------|--------------------------------------------|-------------|--------------------------------|------------------------------|----------|----------|
|       |                                            |             |                                | <b>B</b>                     | <b>C</b> | <b>D</b> |
| 1     | MIL-101(Fe)@Pt@MIL-101(Fe) <sup>9,2</sup>  | 24          | 94.3                           | 97.0                         | 0        | 3.0      |
| 2     | MIL-101(Fe)@Pt@MIL-101(Fe) <sup>22,0</sup> | 24          | 86.3                           | 97.4                         | 0.3      | 2.3      |
| 3     | MIL-101(Cr)@Pt@MIL-101(Fe) <sup>2,9</sup>  | 20          | 99.8                           | 95.6                         | 0.8      | 3.6      |
| 4     | MIL-101(Cr)@Pt@MIL-101(Fe) <sup>8,8</sup>  | 20          | 90.6                           | 94.3                         | 2.1      | 3.6      |
| 5     | MIL-101(Cr)@Pt@MIL-101(Cr) <sup>5,1</sup>  | 2           | 95.1                           | 62.6                         | 12.2     | 25.2     |
| 6     | MIL-101(Fe)@Pt                             | 10          | 97.9                           | 82.1                         | 1.1      | 16.8     |
| 7     | MIL-101(Cr)@Pt                             | 1           | 91.4                           | 50.7                         | 29.1     | 20.2     |
| 8     | Pt NPs                                     | 1           | 99.9                           | 2.9                          | 45.9     | 51.2     |

<sup>a</sup> Reaction condition: each catalyst containing 0.23 mg Pt NPs, 0.4 mmol A, 2 mL ethanol and 0.2 mL water as solvent, room temperature and 3 MPa H<sub>2</sub>. <sup>b</sup> Conversion of A and selectivity of the products were determined by gas chromatography-mass spectrometry and gas chromatography.

**Supplementary Table 4 | Summary of different heterogeneous catalysts for selective hydrogenation of cinnamaldehyde (A) in recent published works.**

| Catalysts                                                                                                          | Reaction conditions                                     |         |       | Conv. (%)       | Sel. (%)      |             |      | Cycle tests (Activity, %)                                    |
|--------------------------------------------------------------------------------------------------------------------|---------------------------------------------------------|---------|-------|-----------------|---------------|-------------|------|--------------------------------------------------------------|
|                                                                                                                    | T (°C)                                                  | P (MPa) | t (h) |                 | B             | C           | D    |                                                              |
|                                                                                                                    | Pt <sub>3</sub> Co capped with oleylamine <sup>29</sup> | 25      | 0.15  | 9               | <b>100</b>    | <b>92.0</b> | 3.0  | 5.0                                                          |
| Fe <sub>0.33</sub> Pt <sub>0.67</sub> coated with ClO <sub>4</sub> <sup>30</sup>                                   | 50                                                      | 0.1     | 1     | <b>71.1</b>     | <b>94.0</b>   | 1.5         | 4.5  | —                                                            |
| Au clusters coated with <i>tert</i> -butyl(naphthalen-1-yl)phosphine oxide <sup>23</sup>                           | 60                                                      | 4       | 18    | <b>&gt;99</b>   | <b>&gt;99</b> | —           | —    | —                                                            |
| Pt/Al <sub>2</sub> O <sub>3</sub> coated with 3-phenyl-1-propanethiol <sup>31</sup>                                | 50                                                      | 4       | 0.6   | <b>100</b>      | <b>90.0</b>   | —           | 10.0 | —                                                            |
| NiIr/TiO <sub>2</sub> <sup>32</sup>                                                                                | 80                                                      | 2       | 1.5   | <b>99.0</b>     | —             | 99.0        | —    | <b>1<sup>st</sup> to 4<sup>th</sup>:<br/>99 to 88</b>        |
| Au/MgAlCeO <sub>2</sub> <sup>33</sup> (15:4:1)                                                                     | 120                                                     | 1       | 6     | <b>91.0</b>     | <b>41.0</b>   | 44.0        | 14.0 | —                                                            |
| PtNi/ZrO <sub>2</sub> <sup>34</sup>                                                                                | 70                                                      | 2       | 6     | <b>67.1</b>     | <b>13.6</b>   | 61.8        | 6.5  | —                                                            |
| Au <sub>25</sub> (SCH <sub>2</sub> CH <sub>2</sub> Ph) <sub>18</sub> /Fe <sub>2</sub> O <sub>3</sub> <sup>22</sup> | 0                                                       | 0.1     | 3     | <b>43.0</b>     | <b>100</b>    | 0           | 0    | —                                                            |
| PdAu <sub>0.2</sub> /SiO <sub>2</sub> <sup>35</sup>                                                                | 50                                                      | 0.5     | 1     | <b>42.0</b>     | —             | 92.0        | —    | —                                                            |
| CuAu/SiO <sub>2</sub> <sup>36</sup>                                                                                | 100                                                     | 2       | 3     | <b>31.0</b>     | <b>56.0</b>   | 38.0        | 6.0  | —                                                            |
| Cu/MCM-41 <sup>37</sup>                                                                                            | 100                                                     | 1       | 3.5   | <b>65.0</b>     | <b>65.0</b>   | 22.0        | 13.0 | —                                                            |
| Cu/MCM-48 <sup>38</sup>                                                                                            | 100                                                     | 1       | 3     | <b>21.3</b>     | <b>48.0</b>   | —           | —    | —                                                            |
| CuCr/SBA-15 <sup>39</sup>                                                                                          | 150                                                     | 0.1     | 6     | <b>11.0</b>     | <b>52.0</b>   | 30.0        | 18.0 | —                                                            |
| Pt/MIL-101(Cr) <sup>26</sup>                                                                                       | 25                                                      | 0.1     | 1     | <b>&gt;99.9</b> | —             | 99.9        | —    | <b>1<sup>st</sup> to 5<sup>th</sup>:<br/>Slight decrease</b> |
| PtRu/MCWNT <sup>40</sup>                                                                                           | 100                                                     | 2       | 2     | <b>80.0</b>     | <b>93.0</b>   | —           | —    | —                                                            |
| PtCo/CNTs <sup>41</sup>                                                                                            | 70                                                      | 2       | 1.5   | <b>85.9</b>     | <b>93.3</b>   | 4.7         | 2.1  | —                                                            |
| PtFe/C <sup>42</sup>                                                                                               | 80                                                      | 4       | 2.5   | <b>85.3</b>     | <b>87.7</b>   | 3.7         | 6.1  | —                                                            |
| AuPd/C <sup>43</sup>                                                                                               | 40                                                      | 0.1     | 11    | <b>96.7</b>     | <b>2.6</b>    | 88.0        | 9.4  | —                                                            |
| PdSn/AC <sup>44</sup>                                                                                              | 130                                                     | 7       | 67    | <b>96.0</b>     | <b>78.0</b>   | —           | —    | —                                                            |
| PtFeZn/C-SA <sup>45</sup>                                                                                          | 75                                                      | 1.6     | 12    | <b>96.0</b>     | <b>86.0</b>   | 1.0         | 22.0 | —                                                            |
| NiCo/MWCNT <sup>46</sup>                                                                                           | 150                                                     | 0.5     | 8     | <b>30.0</b>     | <b>69.0</b>   | 31.0        | —    | —                                                            |

|                                                         |    |     |    |             |             |      |      |                                                           |
|---------------------------------------------------------|----|-----|----|-------------|-------------|------|------|-----------------------------------------------------------|
| Pt/Graphene <sup>47</sup>                               | 60 | 1   | 4  | <b>92.0</b> | <b>88.0</b> | 3.0  | 7.0  | —                                                         |
| 450-NiSix <sup>48</sup>                                 | 80 | 3   | 2  | <b>99.9</b> | <b>0.5</b>  | 39.8 | 59.7 | —                                                         |
| CuPt-Cu <sub>2</sub> S <sup>49</sup>                    | 75 | 0.1 | 15 | <b>100</b>  | <b>5.2</b>  | 86.4 | 8.4  | —                                                         |
| Pt/MgAl-LDH <sup>50</sup>                               | 60 | 1   | 2  | <b>79.7</b> | <b>85.4</b> | 13.3 | 1.0  | <b>1<sup>st</sup> to 4<sup>th</sup>:<br/>80 to 72</b>     |
| Pt@UiO-66-NH <sub>2</sub> <sup>51</sup>                 | 25 | 4   | 42 | <b>85.9</b> | <b>87.9</b> | —    | —    | <b>1<sup>st</sup> to 3<sup>rd</sup>:<br/>85.9 to 86.4</b> |
| MIL-101(Fe)@Pt@<br>MIL-101(Fe) <sup>9,2 This work</sup> | 25 | 3   | 24 | <b>94.3</b> | <b>97.0</b> | 0    | 3.0  | <b>1<sup>st</sup> to 5<sup>th</sup>:<br/>94.3 to 94.8</b> |
| MIL-101(Cr)@Pt@<br>MIL-101(Fe) <sup>2,9 This work</sup> | 25 | 3   | 20 | <b>99.8</b> | <b>95.6</b> | 0.8  | 3.6  | <b>1<sup>st</sup> to 5<sup>th</sup>:<br/>99.8 to 99.8</b> |

As summarized in Supplementary Table 4, it is noticed that most of the reported heterogeneous catalysts are characteristic of metal nanoparticles supported on metal oxide, molecular sieves or carbon materials. Compared with the supported catalysts, we successfully achieve MIL-101@Pt@MIL-101 catalysts possessing exceptionally high selectivity and conversion efficiency simultaneously. Among them, MIL-101(Cr)@Pt@MIL-101(Fe)<sup>2,9</sup> could exhibit an excellent selectivity (95.6%), along with almost full conversion efficiency (99.8%) when applied in selective hydrogenation of **A**. Another prominent advantage of the catalysts with the sandwich nanostructures is their reusability. Both conversion of **A** and selectivity of **B** remain almost unchanged over MIL-101(Cr)@Pt@MIL-101(Fe)<sup>2,9</sup> during five successive catalytic cycles (Supplementary Figs 26-30 and 31a). It can be seen from the above table that most reported catalysts do not show the reusability, and even for a few samples reported, there are deactivations occurred over the supported catalysts<sup>26,32,50</sup>.

Supplementary Table 5 | Selective hydrogenation of furfural (**A**) by different catalysts<sup>a</sup>.

The reaction scheme shows furfural (A) reacting with H<sub>2</sub> to produce furfuryl alcohol (B), furfural (C), and furfuryl alcohol (D). The structures are: A: furfural; B: furfuryl alcohol; C: furfural; D: furfuryl alcohol.

| Entry | Catalysts                                 | Time (h) | Conversion (%) <sup>b</sup> | Selectivity (%) <sup>b</sup> |          |          |
|-------|-------------------------------------------|----------|-----------------------------|------------------------------|----------|----------|
|       |                                           |          |                             | <b>B</b>                     | <b>C</b> | <b>D</b> |
| 1     | MIL-101(Fe)@Pt@MIL-101(Fe) <sup>9,2</sup> | 15       | 85.6                        | 93.2                         | 3.5      | 3.3      |
| 2     | MIL-101(Cr)@Pt@MIL-101(Fe) <sup>8,8</sup> | 7        | 87.9                        | 96.5                         | 3.5      | 0        |
| 3     | MIL-101(Cr)@Pt@MIL-101(Cr) <sup>5,1</sup> | 5        | 98.5                        | 99.8                         | 0        | 0.2      |
| 5     | MIL-101(Fe)@Pt                            | 4        | 84.5                        | 89.1                         | 4.3      | 6.6      |
| 4     | MIL-101(Cr)@Pt                            | 3        | 86.9                        | 91.2                         | 0.9      | 7.9      |
| 6     | Pt NPs                                    | 2        | 85.2                        | 85.7                         | 14.3     | 0        |

<sup>a</sup> Reaction condition: each catalyst containing 0.23 mg Pt NPs, 33  $\mu$ L (0.4 mmol) **A**, 2 mL ethanol and 0.2 mL water as solvent, room temperature and 3 MPa H<sub>2</sub>. <sup>b</sup> Conversion of **A** and selectivity of the products were determined by gas chromatography-mass spectrometry and gas chromatography.

As shown in Supplementary Table 5, Pt NPs can catalyze hydrogenation of **A**, and the selectivity of **B** is ~85.7% when the conversion of **A** is ~85.2%. It is also noticed that both MIL-101(Cr) and MIL-101(Fe) have positive influence on the catalytic selectivity of Pt NPs. The selectivities of **B** can reach ~91.2% for MIL-101(Cr)@Pt and ~89.1% for MIL-101(Fe)@Pt. Furthermore, when sandwich MIL-101(Cr)@Pt@MIL-101(Cr)<sup>5,1</sup> nanostructures are used as catalysts, the selectivity of **B** is up to ~99.8% with ~98.5% conversion of **A**.



**Supplementary Table 6 | Selective hydrogenation of 3-methyl-2-butenal (A) by different catalysts<sup>a</sup>.**

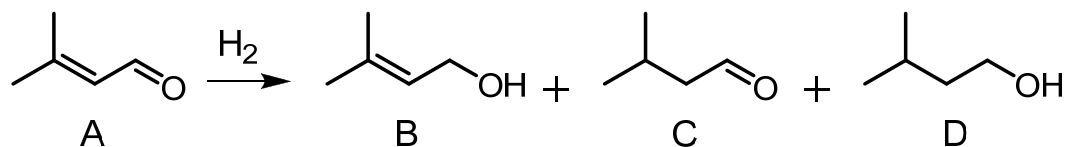

| Entry | Catalysts                                  | Time (h) | Conversion (%) <sup>b</sup> | Selectivity (%) <sup>b</sup> |      |      |
|-------|--------------------------------------------|----------|-----------------------------|------------------------------|------|------|
|       |                                            |          |                             | B                            | C    | D    |
| 1     | MIL-101(Fe)@Pt@MIL-101(Fe) <sup>9,2</sup>  | 17       | 71.1                        | 87.8                         | 3.2  | 9.0  |
| 2     | MIL-101(Fe)@Pt@MIL-101(Fe) <sup>22,0</sup> | 24       | 59.9                        | 92.5                         | 2.8  | 4.7  |
| 3     | MIL-101(Cr)@Pt@MIL-101(Fe) <sup>8,8</sup>  | 10       | 85.0                        | 64.4                         | 7.9  | 27.7 |
| 4     | MIL-101(Cr)@Pt@MIL-101(Cr) <sup>5,1</sup>  | 3        | 80.3                        | 21.8                         | 36.0 | 42.2 |
| 5     | MIL-101(Fe)@Pt                             | 6        | 67.5                        | 74.0                         | 7.9  | 18.1 |
| 6     | MIL-101(Cr)@Pt                             | 2        | 84.2                        | 0                            | 54.5 | 45.5 |
| 7     | Pt NPs                                     | 0.5      | 72.0                        | 3.9                          | 83.2 | 12.9 |

<sup>a</sup> Reaction condition: each catalyst containing 0.23 mg Pt NPs, 40 $\mu$ L (0.4 mmol) **A**, 2 mL isopropanol as solvent, room temperature and 3 MPa H<sub>2</sub>. <sup>b</sup> Conversion of **A** and selectivity of the products were determined by gas chromatography-mass spectrometry and gas chromatography.

As shown in Supplementary Table 6, Pt NPs can catalyze hydrogenation of **A** quickly; however, when the conversion of **A** is ~72%, the selectivity of **B** is ~3.9%. It is also noticed that MIL-101(Cr) has no influence on the catalytic performance of Pt NPs, whereas MIL-101(Fe) can promote formation of target **B**. As for MIL-101(Fe)@Pt, the selectivity of **B** is ~74.0%, which is significantly improved compared with the pure Pt NPs. Furthermore, when sandwich MIL-101(Fe)@Pt@MIL-101(Fe)<sup>22,0</sup> nanostructures are used as catalysts, the selectivity of **B** reaches ~92.5% with ~59.9% conversion of **A**.

Supplementary Table 7 | Selective hydrogenation of acrolein (A) by different catalysts<sup>a</sup>.

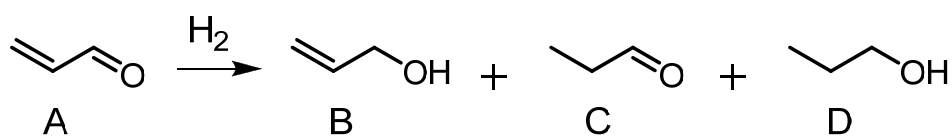

| Entry | Catalysts                                  | Time (h) | Conversion (%) | Selectivity (%) |      |      |
|-------|--------------------------------------------|----------|----------------|-----------------|------|------|
|       |                                            |          |                | B               | C    | D    |
| 1     | MIL-101(Fe)@Pt@MIL-101(Fe) <sup>9.2</sup>  | 3        | 76.9           | 75.7            | 19.0 | 5.3  |
| 2     | MIL-101(Fe)@Pt@MIL-101(Fe) <sup>22.0</sup> | 3        | 52.7           | 97.3            | 2.7  | 0    |
| 3     | MIL-101(Cr)@Pt@MIL-101(Fe) <sup>8.8</sup>  | 1        | 87.5           | 57.9            | 17.3 | 24.8 |
| 4     | MIL-101(Fe)@Pt                             | 0.75     | 92.0           | 53.4            | 21.7 | 24.9 |
| 5     | Pt NPs                                     | 0.1      | 98.2           | 0               | 45.8 | 54.2 |

<sup>a</sup> Reaction condition: each catalyst containing 0.23 mg Pt NPs, 26.5 $\mu$ L (0.4mmol) **A**, 1.8 mL chloroform as solvent, room temperature and 3.0MPa H<sub>2</sub>. <sup>b</sup> Conversion of **A** and selectivity of the products were determined by <sup>1</sup>H NMR.

As shown in Supplementary Table 7, Pt NPs can catalyze hydrogenation of **A** quickly; however, when the conversion of **A** is 98.2%, the selectivity of **B** is zero. Differing from bare Pt NPs, sandwich MIL-101(Fe)@Pt@MIL-101(Fe)<sup>22.0</sup> nanostructures exhibit the dramatically increased selectivity of **B** (~97.3%) along with ~52.7% conversion of **A**.

**Supplementary Table 8** | Summary of different catalysts for selective hydrogenation of acrolein (A) in recent published works.

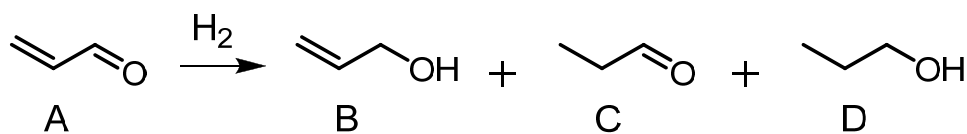

| Catalysts                                                                                | Reaction conditions |         |       | Conv. (%)   | Sel. (%)      |       |      |
|------------------------------------------------------------------------------------------|---------------------|---------|-------|-------------|---------------|-------|------|
|                                                                                          | T (°C)              | P (MPa) | t (h) |             | B             | C     | D    |
| Pt/Al <sub>2</sub> O <sub>3</sub> <sup>52</sup>                                          | 62                  | 0.1     | -     | -           | 0             | 100   | 0    |
| Ag/SiO <sub>2</sub> (20%)-Al <sub>2</sub> O <sub>3</sub> (80%) <sup>53</sup>             | 250                 | 1       | -     | <b>65.0</b> | <b>38.0</b>   | 55.0  | 7.0  |
| Ag/TiO <sub>2</sub> -LTR <sup>54</sup>                                                   | 200                 | 2       | -     | -           | <b>41.8</b>   | 56.0  | 1.3  |
| 8%Ag/SiO <sub>2</sub> <sup>19</sup>                                                      | 200                 | 0.5     | -     | -           | <b>37</b>     | -     | -    |
| 7.5Ag/SiO <sub>2</sub> -IW <sup>20</sup>                                                 | 250                 | 2       | -     | <b>25.0</b> | <b>42.0</b>   | 57.0  | 1.0  |
| Ag/SiO <sub>2</sub> <sup>21</sup>                                                        | 250                 | 1       | -     | <b>51.0</b> | <b>51.0</b>   | 46.0  | 2.0  |
| Au/ZrO <sub>2</sub> <sup>55</sup>                                                        | 240                 | 2       | -     | <b>18.0</b> | <b>30.0</b>   | 60.0  | 8.0  |
| 5%PtSn/Aerosil 200 <sup>56</sup>                                                         | 77                  | 0.1     | 0.75  | -           | <b>16.0</b>   | 75.0  | 5.0  |
| Au-In/ZnO <sup>57</sup>                                                                  | 320                 | 2       | -     | -           | <b>63.3</b>   | 30.4  | 3.5  |
| 9Ag-0.75In/SiO <sub>2</sub> <sup>18</sup>                                                | 240                 | 4       | -     | <b>97.0</b> | <b>61.0</b>   | 20-35 | 5-20 |
| Au <sub>25</sub> (SR) <sub>18</sub> /Fe <sub>2</sub> O <sub>3</sub> <sup>22</sup>        | 0                   | 0.1     | 3     | <b>47.0</b> | <b>92.0</b>   | -     | -    |
| Au clusters coated with <i>tert</i> -butyl(naphthalen-1-yl)phosphine oxide <sup>23</sup> | 40                  | 4       | 18    | <b>61.0</b> | <b>&gt;99</b> | -     | -    |
| <b>MIL-101(Fe)@Pt@MIL-101(Fe)<sup>22.0</sup></b>                                         | 20                  | 3       | 3     | <b>52.7</b> | <b>97.3</b>   | 2.7   | 0    |
| <b>This work</b>                                                                         |                     |         |       |             |               |       |      |

**Supplementary Table 9 | Selective hydrogenation of cinnamaldehyde (A) by different sandwich catalysts<sup>a</sup>.**

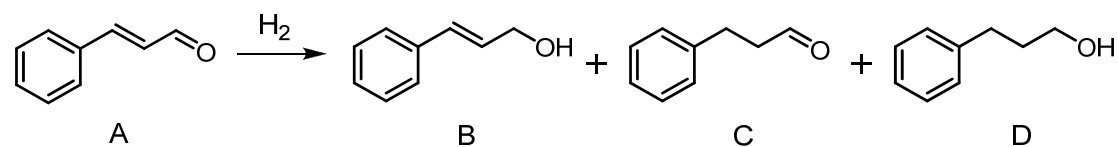

| Entry | Catalysts                                  | Time<br>(h) | Conversion<br>(%) <sup>b</sup> | Selectivity (%) <sup>b</sup> |          |          |
|-------|--------------------------------------------|-------------|--------------------------------|------------------------------|----------|----------|
|       |                                            |             |                                | <b>B</b>                     | <b>C</b> | <b>D</b> |
| 1     | MOF-525(Zr)@Pt@MOF-525(Zr) <sup>26.5</sup> | 20          | 35.2                           | 85.0                         | 10.1     | 4.7      |
| 2     | MOF-74(Co)@Pt@MOF-74(Co) <sup>8.4</sup>    | 20          | 35.0                           | 70.1                         | 11.5     | 18.4     |
| 3     | UiO-66(Zr)@Pt@UiO-66(Zr) <sup>11.2</sup>   | 20          | 90.0                           | 65.0                         | 18.6     | 16.4     |
| 4     | UiO-67(Zr)@Pt@UiO-67(Zr) <sup>24.1</sup>   | 20          | 69.4                           | 73.0                         | 17.9     | 9.1      |

<sup>a</sup>Reaction condition: each catalyst containing 0.23 mg Pt NPs, 0.4 mmol **A**, 2 mL ethanol and 0.2 mL water as solvent, room temperature and 3 MPa H<sub>2</sub>. <sup>b</sup>Conversion of **A** and selectivity of the products were determined by gas chromatography-mass spectrometry and gas chromatography.

**Supplementary Table 10** | Selective hydrogenation of cinnamaldehyde (**A**) by Ru NPs and MIL-101(Fe)@Ru@MIL-101(Fe)<sup>8.3</sup> catalysts<sup>a</sup>.

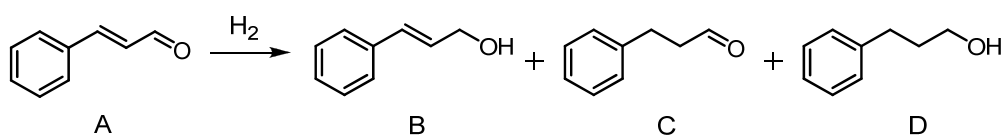

| Entry | Catalysts                                 | Time<br>(h) | Conversion<br>(%) <sup>b</sup> | Selectivity (%) <sup>b</sup> |          |          |
|-------|-------------------------------------------|-------------|--------------------------------|------------------------------|----------|----------|
|       |                                           |             |                                | <b>B</b>                     | <b>C</b> | <b>D</b> |
| 1     | Ru NPs                                    | 3           | 20.4                           | 20.8                         | 79.2     | 0        |
| 2     | MIL-101(Fe)@Ru@MIL-101(Fe) <sup>8.3</sup> | 24          | 48.7                           | 58.5                         | 41.5     | 0        |

<sup>a</sup> Reaction condition: each catalyst containing 0.23 mg Ru NPs, 0.4 mmol **A** (50  $\mu$ L), room temperature and 3.0 MPa H<sub>2</sub>. <sup>b</sup> Conversion of **A** and selectivity of the products were determined by GC.

**Supplementary Table 11** | Selective hydrogenation of cinnamaldehyde (**A**) by Pt/C and Pt/Fe<sub>2</sub>O<sub>3</sub> catalysts<sup>a</sup>.

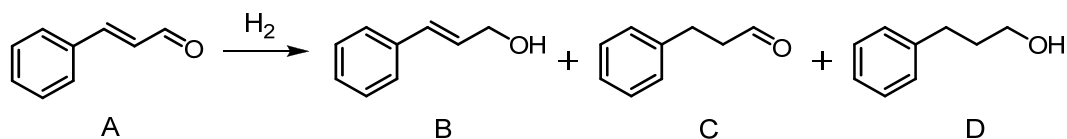

| Entry | Catalysts                         | Time<br>(h) | Conversion<br>(%) <sup>b</sup> | Selectivity (%) <sup>b</sup> |          |          |
|-------|-----------------------------------|-------------|--------------------------------|------------------------------|----------|----------|
|       |                                   |             |                                | <b>B</b>                     | <b>C</b> | <b>D</b> |
| 1     | Pt/C                              | 0.5         | 98.1                           | 39.9                         | 44.7     | 15.4     |
| 2     | Pt/Fe <sub>2</sub> O <sub>3</sub> | 24          | 54.5                           | 84.5                         | 15.5     | 0        |

<sup>a</sup> Reaction condition: each catalyst containing 0.23 mg Pt NPs (1.12 mg Pt/C), 0.4 mmol **A** (50  $\mu$ L), 2 mL ethanol and 0.2 mL water as solvent, room temperature and 3.0 MPa H<sub>2</sub>. <sup>b</sup> Conversion of **A** and selectivity of the products were determined by GC.

Commercial Pt/C and Pt/Fe<sub>2</sub>O<sub>3</sub> catalysts are also used for hydrogenation of **A**. The conversion efficiencies of 98.1% and 54.5% with corresponding selectivities of 39.9% and 84.5% toward **B** are respectively achieved. Notably, Fe<sub>2</sub>O<sub>3</sub> can significantly promote the hydrogenation on C=O group compared with carbon, suggesting that Fe-based supports are favourable for hydrogenation on C=O group although not as effective as the sandwich form of catalysts. These indicate that the porous nature of MOFs and smart sandwich structures are of great importance for hydrogenation on C=O groups.

## Supplementary References

1. Teranishi, T., Hosoe, M., Tanaka, T. & Miyake, M. Size control of monodispersed Pt nanoparticles and their 2D organization by electrophoretic deposition. *J. Phys. Chem. B* **103**, 3818–3827 (1999).
2. Wang, L., Chen, J., Ge, L., Rudolph, V. & Zhu, Z. Halloysite nanotube supported Ru nanocatalysts synthesized by the inclusion of preformed Ru nanoparticles for preferential oxidation of CO in H<sub>2</sub>-rich atmosphere. *J. Phys. Chem. C* **117**, 4141–4151 (2013).
3. Taylor-Pashow, K. M. L., Rocca, J. D., Xie, Z., Tran, S. & Lin, W. Postsynthetic modifications of iron-carboxylate nanoscale metal-organic frameworks for imaging and drug delivery. *J. Am. Chem. Soc.* **131**, 14261–14263 (2009).
4. Férey, G. *et al.* A chromium terephthalate-based solid with unusually large pore volumes and surface area. *Science* **309**, 2040–2042 (2005).
5. Morris, W. *et al.* Synthesis, Structure, and Metalation of Two New Highly Porous Zirconium Metal–Organic Frameworks. *Inorg. Chem.* **51**, 6443–6445 (2012).
6. Na, K., Choi, K. M., Yaghi, O. M. & Somorjai, G. A. Metal Nanocrystals Embedded in Single Nanocrystals of MOFs Give Unusual Selectivity As Heterogeneous Catalysts. *Nano Lett.* **14**, 5979–5983 (2014).
7. Grant Glover, T. Peterson, G. W., Schindler, B. J., Britt, D. and Yaghi, O. MOF-74 building unit has a direct impact on toxic gas adsorption. *Chem. Eng. Sci.* **66**, 163–170 (2011).
8. Kresse, G. & Hafner, J. Ab initio molecular dynamics for liquid metals. *Phys. Rev. B* **47**, 558–561 (1993).
9. Kresse, G. & Furthmüller, J. Efficiency of ab-initio total energy calculations for metals and semiconductors using a plane-wave basis set. *Comput. Mater. Sci.* **6**, 15–50 (1996).
10. Kresse, G. & Joubert, D. From ultrasoft pseudo potentials to the projector augmented-wave method. *Phys. Rev. B* **59**, 1758–1775 (1999).
11. Vanderbilt, D. Soft self-consistent pseudo potentials in a generalized eigen value formalism. *Phys. Rev. B* **41**, 7892–7895 (1990).
12. Kresse, G. & Hafner, J. Norm-conserving and ultrasoft pseudo potentials for first-row and transition elements. *J. Phys.: Condens. Matter* **6**, 8245–8257 (1994).

13. Perdew, J. P., Burke, K. & Ernzerhof, M. Generalized gradient approximation made simple. *Phys. Rev. Lett.* **77**, 3865–3868 (1996).
14. Dudarev, S. L., Botton, G. A., Savrasov, S. Y., Humphreys, C. J. & Sutton, A. P. Electron-energy-loss spectra and the structural stability of nickel oxide: an LSDA+U study. *Phys. Rev. B* **57**, 1505–1509 (1998).
15. Makov, G. & Payne, M. C. Periodic boundary conditions in *ab initio* calculations. *Phys. Rev. B* **51**, 4014–4022 (1995).
16. Neugebauer, J. & Scheffler, M. Adsorbate-substrate and adsorbate-adsorbate interactions of Na and K adlayers on Al (111). *Phys. Rev. B* **46**, 16067–16080 (1992).
17. Henkelman, G., Arnaldsson, A. & Jónsson, H. A fast and robust algorithm for bader decomposition of charge density. *Comput. Mater. Sci.* **36**, 354–360 (2006).
18. Lucas, M. & Claus, P. Hydrogenations over silver: a highly active and chemoselective Ag-In/SiO<sub>2</sub> catalyst for the one-step synthesis of allyl alcohol from acrolein. *Chem. Eng. Technol.* **28**, 867–870 (2005).
19. Aich, P. *et al.* Single-atom alloy Pd-Ag catalyst for selective hydrogenation of acrolein. *J. Phys. Chem. C* **119**, 18140–18148 (2015).
20. Bron, M. *et al.* Bridging the pressure and materials gap: in-depth characterization and reaction studies of silver-catalysed acrolein hydrogenation. *J. Catal.* **234**, 37–47 (2005).
21. Bron, M. *et al.* Oxygen-induced activation of silica supported silver in acrolein hydrogenation. *Appl. Catal. A-Gen.* **341**, 127–132 (2008).
22. Zhu, Y., Qian, H., Drake, B. A. & Jin, R. Atomically precise Au<sub>25</sub>(SR)<sub>18</sub> nanoparticles as catalysts for the selective hydrogenation of  $\alpha$ ,  $\beta$ -unsaturated ketones and aldehydes. *Angew. Chem. Int. Ed.* **49**, 1295–1298 (2010).
23. Cano, I., Chapman, A. M., Urakawa, A. & van Leeuwen, P. W. N. M. Air-stable gold nanoparticles ligated by secondary phosphine oxides for the chemoselective hydrogenation of aldehydes: crucial role of the ligand. *J. Am. Chem. Soc.* **136**, 2520–2528 (2014).
24. Gilbert, J. B., Rubner, M. F. & Cohen, R. E. Depth-profiling X-ray photoelectron spectroscopy (XPS) analysis of interlayer diffusion in polyelectrolyte multilayers. *Proc. Natl. Acad. Sci. USA* **110**, 6651–6656 (2013).



25. Nørskov, J. K. *et al.* Trends in the exchange current for hydrogen evolution. *J. Electrochem. Soc.* **152**, J23–J26 (2005).
26. Liu, H., Li, Z. & Li, Y. Chemoselective hydrogenation of cinnamaldehyde over a Pt-Lewis acid collaborative catalyst under ambient conditions. *Ind. Eng. Chem. Res.* **54**, 1487–1497 (2015).
27. Li, H., Liu, J., Yang, H. & Li, H. Influence of pore structure on catalytic properties of mesoporous silica-supported Co-B amorphous alloys in hydrogenation of cinnamaldehyde to cinnamyl alcohol. *Chin. J. Chem.* **27**, 2316–2322 (2009).
28. Moellmer, J. *et al.* Insights on adsorption characterization of metal-organic frameworks: a benchmark study on the novel soc-MOF. *Micropor. Mesopor. Mater.* **129**, 345–353 (2010).
29. Wu, B., Huang, H., Yang, J., Zheng, N. & Fu, G. Selective hydrogenation of  $\alpha,\beta$ -unsaturated aldehydes catalyzed by amine-capped platinum-cobalt nanocrystals. *Angew. Chem. Int. Ed.* **51**, 3440–3443 (2012).
30. Vu, K. B., Bukhryakov, K. V., Anjum, D. H. & Rodionov, V. O. Surface-bound ligands modulate chemoselectivity and activity of a bimetallic nanoparticle catalyst. *ACS Catal.* **5**, 2529–2533 (2015).
31. Kahsar, K. R., Schwartz, D. K. & Medlin, J. W. Control of metal catalyst selectivity through specific noncovalent molecular interactions. *J. Am. Chem. Soc.* **136**, 520–526 (2014).
32. Lin, W., Cheng, H., He, L., Yu, Y. & Zhao, F. High performance of Ir-promoted Ni/TiO<sub>2</sub> catalyst toward the selective hydrogenation of cinnamaldehyde. *J. Catal.* **303**, 110–116 (2013).
33. Tian, Z., Xiang, X., Xie, L. & Li, F. Liquid-phase hydrogenation of cinnamaldehyde: enhancing selectivity of supported gold catalysts by incorporation of cerium into the support. *Ind. Eng. Chem. Res.* **52**, 288–296 (2013).
34. Han, X., Zhou, R., Yue, B. & Zheng, X. Selective hydrogenation of cinnamaldehyde over Pt/ZrO<sub>2</sub> catalyst modified by Cr, Mn, Fe, Co and Ni. *Catal. Lett.* **109**, 157–161 (2006).
35. Yang, X. *et al.* High-performance Pd-Au bimetallic catalyst with mesoporous silica nanoparticles as support and its catalysis of cinnamaldehyde hydrogenation. *J. Catal.* **291**,

- 36–43 (2012).
36. Yuan, X. *et al.* Liquid-phase hydrogenation of cinnamaldehyde over Cu-Au/SiO<sub>2</sub> catalysts. *AIChE J.* **60**, 3300–3311 (2014).
  37. Gutiérrez, V., Nador, F., Radivoy, G. & Volpe, M. A. Highly selective copper nanoparticles for the hydrogenation of  $\alpha,\beta$ -unsaturated aldehydes in liquid phase. *Appl. Catal. A-Gen.* **464-465**, 109–115 (2013).
  38. Gutiérrez, V. S., Diez, A. S., Dennehy, M. & Volpe, M. A. Cu incorporated MCM-48 for the liquid phase hydrogenation of cinnamaldehyde. *Micropor. Mesopor. Mater.* **141**, 207–213 (2011).
  39. Dragoi, B. *et al.* Enhancing the performance of SBA-15-supported copper catalysts by chromium addition for the chemoselective hydrogenation of *trans*-cinnamaldehyde. *Catal. Sci. Technol.* **3**, 2319–2329 (2013).
  40. Vu, H. *et al.* Bimetallic catalysis on carbon nanotubes for the selective hydrogenation of cinnamaldehyde. *J. Catal.* **240**, 18–22 (2006).
  41. Li, Y., Zhu, P.-F. & Zhou, R.-X. Selective hydrogenation of cinnamaldehyde to cinnamyl alcohol with carbon nanotubes supported Pt-Co catalysts. *Appl. Surf. Sci.* **254**, 2609–2614 (2008).
  42. Liu, Z., Tan, X., Li, J. & Lv, C. Easy synthesis of bimetal PtFe-containing ordered mesoporous carbons and their use as catalysts for selective cinnamaldehyde hydrogenation. *New J. Chem.* **37**, 1350–1357 (2013).
  43. Gu, H., Xu, X., Chen, A.-A., Ao, P. & Yan, X. Separate deposition of gold and palladium nanoparticles on ordered mesoporous carbon and evaluation of their catalytic activity for cinnamaldehyde hydrogenation under atmospheric condition. *Catal. Commun.* **41**, 65–69 (2013).
  44. Zhao, J., Xu, X., Li, X. & Wang, J. Promotion of Sn on the Pd/AC catalyst for the selective hydrogenation of cinnamaldehyde. *Catal. Commun.* **43**, 102–106 (2014).
  45. Mahata, N., Gonçalves, F., Pereira, M. F. R. & Figueiredo, J. L. Selective hydrogenation of cinnamaldehyde to cinnamyl alcohol over mesoporous carbon supported Fe and Zn promoted Pt catalyst. *Appl. Catal. A-Gen.* **339**, 159–168 (2008).
  46. Malobela, L. J., Heveling, J., Augustyn, W. G. & Cele, L. M. Nickel-cobalt on

- carbonaceous supports for the selective catalytic hydrogenation of cinnamaldehyde. *Ind. Eng. Chem. Res.* **53**, 13910–13919 (2014).
47. Ji, X. *et al.* Selective hydrogenation of cinnamaldehyde to cinnamal alcohol over platinum/graphene catalysts. *ChemCatChem* **6**, 3246–3253 (2014).
48. Chen, X. *et al.* Nickel-silicon intermetallics with enhanced selectivity in hydrogenation reactions of cinnamaldehyde and phenylacetylene. *Ind. Eng. Chem. Res.* **51**, 3604–3611 (2012).
49. Sang, W. *et al.* One-step synthesis of hybrid nanocrystals with rational tuning of the morphology. *Nano Lett.* **14**, 6666–6671 (2014).
50. Xiang, X., He, W., Xie, L. & Li, F. A mild solution chemistry method to synthesize hydrotalcite-supported platinum nanocrystals for selective hydrogenation of cinnamaldehyde in neat water. *Catal. Sci. Technol.* **3**, 2819–2827 (2013).
51. Guo, Z. *et al.* Pt nanoclusters confined within metal-organic framework cavities for chemoselective cinnamaldehyde hydrogenation. *ACS Catal.* **4**, 1340–1348 (2014).
52. Hoang-Van, C. & Zegaoui, O. Studies of high surface area Pt/MoO<sub>3</sub> and Pt/WO<sub>3</sub> catalysts for selective hydrogenation reactions. II. Reactions of acrolein and allyl alcohol. *Appl. Catal. A-Gen.* **164**, 91–103 (1997).
53. Volckmar, C. E., Bron, M., Bentrup, U., Martin, A. & Claus, P. Influence of the support composition on the hydrogenation of acrolein over Ag/SiO<sub>2</sub>-Al<sub>2</sub>O<sub>3</sub> catalysts. *J. Catal.* **261**, 1–8 (2009).
54. Grünert, W., Brückner, A., Hofmeister, H. & Claus, P. Structural properties of Ag/TiO<sub>2</sub> catalysts for acrolein hydrogenation. *J. Phys. Chem. B* **108**, 5709–5717 (2004).
55. Mohr, C., Hofmeister, H. & Claus, P. The influence of real structure of gold catalysts in the partial hydrogenation of acrolein. *J. Catal.* **213**, 86–94 (2003).
56. Marinelli, T. B. L.W. & Ponec, V. A study on the selectivity in acrolein hydrogenation on platinum catalysts: a model for hydrogenation of  $\alpha,\beta$ -unsaturated aldehydes. *J. Catal.* **156**, 51–59 (1995).
57. Mohr, C., Hofmeister, H., Radnik, J. & Claus, P. Identification of active sites in gold-catalyzed hydrogenation of acrolein. *J. Am. Chem. Soc.* **125**, 1905–1911 (2003).
